# Supplementary material for: Palladium-catalyzed annulative π-extension of o-halobiphenyls with o-chloropyridinecarboxylic acids to access azatriphenylenes
Source: Royal Society of Chemistry journal article supplement (doi:10.1039/d2ob01562e), 2022-01-01

# **Palladium-catalyzed annulative $\pi$ -extension of *o*-halobiphenyls with *o*-chloropyridinecarboxylic acids to access azatriphenylenes**

Shu-Lin, Cheng, Xin-Yue Fan, Ji-Fa Zhu, Bi-Qin Wang, Yingbo Shi,\* Chun Feng,\* and Shi-Kai Xiang\*

College of Chemistry and Materials Science, Sichuan Normal University, Chengdu 610068, P. R. China

\*E-mail: ybshi@sicnu.edu.cn (Y. S.); fengc@sicnu.edu.cn (C. F.); xiangsk@sicnu.edu.cn (S.-K. X.)

## **Table of Contents**

|                                                       |     |
|-------------------------------------------------------|-----|
| General remarks                                       | S2  |
| Synthesis of compounds <b>1</b>                       | S2  |
| General procedure for synthesis of compounds <b>3</b> | S3  |
| Synthesis of compounds <b>5</b>                       | S12 |
| References                                            | S13 |
| NMR spectra of compounds                              | S14 |

## General remarks

All of the manipulations were conducted with a Schlenk tube.  $^1\text{H}$  NMR spectra were recorded on Bruker 600 MHz spectrometer. Chemical shifts (in parts per million (ppm)) were referenced to tetramethylsilane ( $\delta = 0$  ppm) as an internal standard in  $\text{CDCl}_3$ .  $^{13}\text{C}\{^1\text{H}\}$  NMR spectra were obtained by the same NMR spectrometer and were calibrated with  $\text{CDCl}_3$  ( $\delta = 77.00$  ppm). High-resolution mass spectra (HRMS) were obtained using a quadrupole time-of-flight (Q-TOF) mass spectrometer with an electrospray ionization (ESI) resource, a quadrupole fourier-transform (Q-FT) mass spectrometer with an electrospray ionization (ESI) resource, or an orbitrap fourier-transform mass spectrometer with an electron ionization (EI) resource. Melting points were determined with a melting point apparatus. Unless otherwise noted, other materials obtained from commercial suppliers were used without further purification.

## Synthesis of compounds 1

The compounds **1b-I**,<sup>1</sup> **1c-I**<sup>2</sup> and **1d-I~1o-I**<sup>1</sup> were synthesized according to the methods described in the literature. Compounds **1b-I**,<sup>1</sup> **1c-I**,<sup>3</sup> **1d-I~1e-I**,<sup>1</sup> **1f-I**,<sup>4</sup> **1g-I**,<sup>1</sup> **1h-I**,<sup>5</sup> **1i-I**,<sup>1</sup> **1j-I**,<sup>6</sup> **1k-I**,<sup>7</sup> **1l-I**,<sup>1</sup> **1m-I**,<sup>4</sup> **1n-I**,<sup>6</sup> and **1o-I**<sup>1</sup> are known, and the data are consistent with the literatures. The compounds **1b-Br~1c-Br**,<sup>8</sup> **1e-Br~1f-Br**,<sup>8</sup> **1h-Br**,<sup>8</sup> **1o-Br**<sup>8</sup> and **1p-Br**<sup>9</sup> were synthesized according to the methods described in the literature. Compounds **1b-Br**,<sup>10</sup> **1c-Br**,<sup>11</sup> **1e-Br~1f-Br**,<sup>12</sup> **1h-Br**,<sup>13</sup> **1o-Br**<sup>14</sup> and **1p-Br**<sup>9</sup> are known, and the data are consistent with the literatures.

The compound **1p-I** were synthesized from 1,2-bis(hexyloxy)-4,5-diiodobenzene (1.0604 g, 2.0 mmol) and 2-(3,4-bis(hexyloxy)phenyl)-4,4,5,5-tetramethyl-1,3,2-dioxaborolane (1.0110 g, 2.5 mmol) according to the methods described in the literature.<sup>15</sup> 490.1 mg (36% yield) of **1p-I** was afforded. White solid; mp 44.2–44.6 °C; IR (KBr,  $\text{cm}^{-1}$ )  $\nu_{\text{max}}$  2962, 2924, 2859, 1593, 1501, 1462, 1251, 1196;  $^1\text{H}$  NMR (600 MHz,  $\text{CDCl}_3$ , ppm)  $\delta$  7.34 (s, 1H), 6.89 (d,  $J = 8.4$  Hz, 1H), 6.87 (d,  $J = 2.4$  Hz, 1H), 6.84 (s, 1H), 6.82 (dd,  $J_1 = 8.4$ ,  $J_2 = 2.4$  Hz, 1H), 4.03 (t,  $J = 6.6$  Hz, 4H), 3.99 (t,  $J = 6.6$  Hz, 2H), 3.96 (t,  $J = 6.6$  Hz, 2H), 1.87–1.78 (m, 8H), 1.52–1.42 (m, 8H), 1.38–1.31 (m, 16H), 0.93–0.86 (m, 12H);  $^{13}\text{C}\{^1\text{H}\}$  NMR (150 MHz,  $\text{CDCl}_3$ , ppm)  $\delta$  149.1, 148.6, 148.5, 148.1, 139.1, 137.0, 123.9, 121.7, 115.5, 115.3, 112.8, 86.8, 69.5, 69.3, 69.1, 31.6, 31.5, 29.3, 29.2, 29.1, 29.1, 25.7, 25.7, 25.6, 25.6, 22.6, 22.6, 22.6, 14.0, 14.0; HRMS (ESI)  $m/z$ :  $[\text{M}+\text{H}]^+$  calcd for  $\text{C}_{36}\text{H}_{58}\text{IO}_4$  681.3380, Found 681.3378.

The compound **1d-Br** were synthesized from 4,4'-dimethoxy-biphenyl-2-amine (458.5 mg, 2.0 mmol) according to the methods described in the literature.<sup>8</sup> 457.3 mg (78% yield) of **1d-Br** was afforded. White solid; mp 69.9–70.3 °C; IR (KBr,  $\text{cm}^{-1}$ )  $\nu_{\text{max}}$  2945, 2899, 2830, 1602, 1484, 1458, 1285, 1248, 1215, 1178, 1029, 808, 544;  $^1\text{H}$  NMR (600 MHz,  $\text{CDCl}_3$ , ppm)  $\delta$  7.31 (d,  $J = 9.0$  Hz, 2H), 7.22 (d,  $J = 8.4$  Hz, 1H), 7.20 (d,  $J = 2.4$  Hz, 1H), 6.94 (d,  $J = 8.4$  Hz, 2H), 6.89 (dd,  $J_1 = 8.4$ ,  $J_2 = 3.0$  Hz, 1H),

3.85 (s, 3H), 3.82 (s, 3H);  $^{13}\text{C}\{^1\text{H}\}$  NMR (150 MHz,  $\text{CDCl}_3$ , ppm)  $\delta$  159.0, 158.8, 134.6, 133.2, 131.7, 130.7, 123.0, 118.1, 113.5, 113.3, 55.6, 55.2; HRMS (ESI)  $m/z$ :  $[\text{M}]^+$  calcd for  $\text{C}_{14}\text{H}_{13}\text{BrO}_2$  292.0099, Found 292.0095.

The compound **1g-Br** were synthesized from 4,4'-bis(trifluoromethyl)-biphenyl-2-amine (610.4 mg, 2.0 mmol) according to the methods described in the literature.<sup>8</sup> 561.0 mg (76% yield) of **1g-Br** was afforded. Colourless liquid; IR (KBr,  $\text{cm}^{-1}$ )  $\nu_{\text{max}}$  3076, 1614, 1385, 1332, 1190, 1130, 828;  $^1\text{H}$  NMR (600 MHz,  $\text{CDCl}_3$ , ppm)  $\delta$  7.97 (d,  $J = 1.8$  Hz, 1H), 7.72 (d,  $J = 7.8$  Hz, 2H), 7.65 (dd,  $J_1 = 7.8$ ,  $J_2 = 1.8$  Hz, 1H), 7.52 (d,  $J = 7.8$  Hz, 2H), 7.43 (d,  $J = 7.8$  Hz, 1H);  $^{13}\text{C}\{^1\text{H}\}$  NMR (150 MHz,  $\text{CDCl}_3$ , ppm)  $\delta$  144.8, 143.3, 131.7 (q,  $J = 33.15$  Hz), 131.4, 130.5 (q,  $J = 32.4$  Hz), 130.3 (q,  $J = 3.45$  Hz), 129.6, 125.3 (q,  $J = 3.6$  Hz), 124.4 (q,  $J = 3.45$  Hz), 124.0 (q,  $J = 270.75$  Hz), 123.1 (q,  $J = 270.9$  Hz), 122.7; HRMS (EI)  $m/z$ :  $[\text{M}]^+$  calcd for  $\text{C}_{14}\text{H}_7\text{BrF}_6$  367.9635, Found 367.9623.

### General procedure for synthesis of compounds 3

$\text{Pd}(\text{PPh}_3)_2\text{Cl}_2$  (7.0 mg, 0.01 mmol),  $\text{K}_2\text{CO}_3$  (110.6 mg, 0.8 mmol), *o*-halobiphenyl derivatives **1** (0.2 mmol) and *o*-chloropyridinecarboxylic acids **2** (0.2 mmol) were placed into a 25 mL Schlenk tube equipped with a magnetic stir bar. To this mixture was added DMF (3.0 mL) with an injection syringe under nitrogen atmosphere. The reaction mixture was stirred for 12 h at the appointed temperature in an oil bath. Then the solution was cooled to room temperature, quenched by the addition of 30 mL water, and extracted with dichloromethane ( $3 \times 20$  mL). The combined organic layer was washed with brine ( $3 \times 30$  mL), dried over anhydrous  $\text{MgSO}_4$ , and concentrated in vacuum. The residue was purified by column chromatography on silica gel to afford the products **3**.

#### 2-Azatriphenylene (3aa)

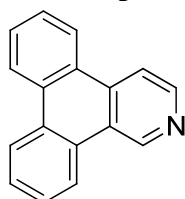

Method A: the reaction of 2-iodobiphenyl **1a-I** (56.0 mg, 0.2 mmol) with 3-chloropyridine-4-carboxylic acid **2a** (31.5 mg, 0.2 mmol) was carried out according to the general procedure to afford 41.7 mg (91% yield) of **3aa**. Method B: the reaction of 2-bromobiphenyl **1a-Br** (46.6, 0.2 mmol) with 3-chloropyridine-4-carboxylic acid **2a** (31.5 mg, 0.2 mmol) was carried out according to the general procedure to afford 44.0 mg (96% yield) of **3aa**. Method C: the reaction of 2-iodobiphenyl **1a-I** (56.0 mg, 0.2 mmol) with 4-chloropyridine-3-carboxylic acid (31.5 mg, 0.2 mmol) was carried out according to the general procedure to afford 35.8 mg (78% yield) of **3aa**. White solid; mp 171.2–172.0 °C; IR (KBr,  $\text{cm}^{-1}$ )  $\nu_{\text{max}}$  1595, 1408, 1274, 758;  $^1\text{H}$  NMR (600 MHz,  $\text{CDCl}_3$ , ppm)  $\delta$  9.93 (s, 1H), 8.77 (d,  $J = 5.4$  Hz, 1H), 8.73–8.69 (m, 1H), 8.64–8.58 (m,

3H), 8.33 (d,  $J = 6.0$  Hz, 1H), 7.77 -7.73 (m, 1H), 7.71-7.66 (m, 3H);  $^{13}\text{C}\{^1\text{H}\}$  NMR (150 MHz,  $\text{CDCl}_3$ , ppm)  $\delta$  146.8, 146.4, 135.1, 131.2, 129.9, 129.3, 128.0, 128.0, 127.8, 127.5, 127.4, 124.5, 123.7, 123.4, 122.6, 116.3; HRMS (ESI)  $m/z$ :  $[\text{M}+\text{H}]^+$  calcd for  $\text{C}_{17}\text{H}_{12}\text{N}$  230.0970, Found 230.0973.

### 6,11-Dimethyl-2-azatriphenylene (3ba)

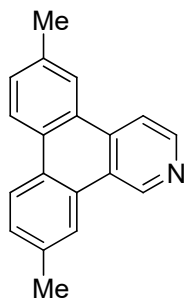

Method A: the reaction of 4,4'-dimethyl-2-iodobiphenyl **1b-I** (61.6 mg, 0.2 mmol) with 3-chloropyridine-4-carboxylic acid **2a** (31.5 mg, 0.2 mmol) was carried out according to the general procedure to afford 43.7 mg (85% yield) of **3ba**. Method B: the reaction of 4,4'-dimethyl-2-bromobiphenyl **1b-Br** (52.2, 0.2 mmol) with 3-chloropyridine-4-carboxylic acid **2a** (31.5 mg, 0.2 mmol) was carried out according to the general procedure to afford 48.9 mg (95% yield) of **3ba**. Yellow solid; mp 163.4–163.7 °C; IR (KBr,  $\text{cm}^{-1}$ )  $\nu_{\text{max}}$  1595, 1412, 796;  $^1\text{H}$  NMR (600 MHz,  $\text{CDCl}_3$ , ppm)  $\delta$  9.87 (s, 1H), 8.71 (d,  $J = 5.4$  Hz, 1H), 8.42 (s, 1H), 8.41 (d,  $J = 8.4$  Hz, 1H), 8.40 (d,  $J = 8.4$  Hz, 1H), 8.30 (s, 1H), 8.27 (d,  $J = 6.0$  Hz, 1H), 7.50 (dd,  $J_1 = 8.4$ ,  $J_2 = 1.2$  Hz, 1H), 7.46 (dd,  $J_1 = 8.4$ ,  $J_2 = 1.2$  Hz, 1H), 2.59 (s, 3H), 2.57 (s, 3H);  $^{13}\text{C}\{^1\text{H}\}$  NMR (150 MHz,  $\text{CDCl}_3$ , ppm)  $\delta$  146.7, 146.0, 137.1, 136.8, 135.1, 130.7, 129.4, 129.0, 127.7, 127.6, 127.0, 124.5, 123.6, 123.0, 122.4, 116.2, 21.8, 21.6; HRMS (ESI)  $m/z$ :  $[\text{M}+\text{H}]^+$  calcd for  $\text{C}_{19}\text{H}_{16}\text{N}$  258.1283, Found 258.1287.

### 6,11-Di-tert-butyl-2-azatriphenylene (3ca)

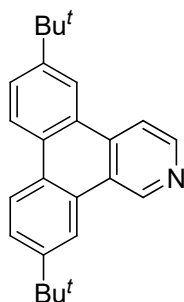

Method A: the reaction of 4,4'-di-tert-butyl-2-iodobiphenyl **1c-I** (78.5 mg, 0.2 mmol) with 3-chloropyridine-4-carboxylic acid **2a** (31.5 mg, 0.2 mmol) was carried out according to the general procedure to afford 53.3 mg (78% yield) of **3ca**. Method B: the reaction of 4,4'-di-tert-butyl-2-bromobiphenyl **1c-Br** (69.1, 0.2 mmol) with 3-chloropyridine-4-carboxylic acid **2a** (31.5 mg, 0.2 mmol) was carried out according to the general procedure to afford 50.5 mg (74% yield) of **3ca**. White solid; mp 151.5–152.2 °C; IR (KBr,  $\text{cm}^{-1}$ )  $\nu_{\text{max}}$  2961, 2901, 2865, 1616, 1266, 807,



631;  $^1\text{H}$  NMR (600 MHz,  $\text{CDCl}_3$ , ppm)  $\delta$  10.00 (s, 1H), 8.78 (d,  $J = 5.4$  Hz, 1H), 8.73 (d,  $J = 1.8$  Hz, 1H), 8.60 (d,  $J = 1.8$  Hz, 1H), 8.55 (d,  $J = 9.0$  Hz, 1H), 8.54 (d,  $J = 9.0$  Hz, 1H), 8.41 (d,  $J = 6.0$  Hz, 1H), 7.81 (dd,  $J_1 = 9.0$ ,  $J_2 = 2.4$  Hz, 1H), 7.76 (dd,  $J_1 = 8.4$ ,  $J_2 = 2.4$  Hz, 1H), 1.51 (s, 9H), 1.50 (s, 9H);  $^{13}\text{C}\{^1\text{H}\}$  NMR (150 MHz,  $\text{CDCl}_3$ , ppm)  $\delta$  150.3, 150.0, 146.8, 146.0, 135.6, 129.0, 127.6, 127.4, 127.4, 126.8, 126.0, 125.0, 123.1, 123.1, 119.6, 118.5, 116.3, 35.1, 35.0, 31.4, 31.4; HRMS (ESI)  $m/z$ :  $[\text{M}+\text{H}]^+$  calcd for  $\text{C}_{25}\text{H}_{28}\text{N}$  342.2222, Found 342.2226.

### 6,11-Dimethoxy-2-azatriphenylene (3da)

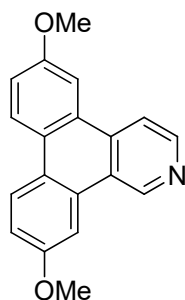

Method A: the reaction of 4,4'-dimethoxy-2-iodobiphenyl **1d-I** (68.0 mg, 0.2 mmol) with 3-chloropyridine-4-carboxylic acid **2a** (31.5 mg, 0.2 mmol) was carried out according to the general procedure to afford 52.0 mg (90% yield) of **3da**. Method B: the reaction of 4,4'-dimethoxy-2-bromobiphenyl **1d-Br** (58.6, 0.2 mmol) with 3-chloropyridine-4-carboxylic acid **2a** (31.5 mg, 0.2 mmol) was carried out according to the general procedure to afford 48.0 mg (83% yield) of **3da**. Yellow solid; mp 180.2–180.8 °C; IR (KBr,  $\text{cm}^{-1}$ )  $\nu_{\text{max}}$  1616, 1221, 814;  $^1\text{H}$  NMR (600 MHz,  $\text{CDCl}_3$ , ppm)  $\delta$  9.74 (s, 1H), 8.69 (d,  $J = 5.4$  Hz, 1H), 8.28 (d,  $J = 9.6$  Hz, 1H), 8.27 (d,  $J = 9.0$  Hz, 1H), 8.13 (d,  $J = 5.4$  Hz, 1H), 7.93 (d,  $J = 2.4$  Hz, 1H), 7.79 (d,  $J = 2.4$  Hz, 1H), 7.24 (dd,  $J_1 = 9.0$ ,  $J_2 = 3.0$  Hz, 1H), 7.20 (dd,  $J_1 = 9.0$ ,  $J_2 = 2.4$  Hz, 1H), 3.98 (s, 3H), 3.97 (s, 3H);  $^{13}\text{C}\{^1\text{H}\}$  NMR (150 MHz,  $\text{CDCl}_3$ , ppm)  $\delta$  158.4, 158.2, 146.7, 146.0, 135.0, 128.2, 127.6, 125.2, 124.4, 124.3, 124.3, 123.9, 118.0, 116.7, 116.2, 105.6, 104.6, 55.4; HRMS (ESI)  $m/z$ :  $[\text{M}+\text{H}]^+$  calcd for  $\text{C}_{19}\text{H}_{16}\text{NO}_2$  290.1181, Found 290.1187.

### 6,11-Difluoro-2-azatriphenylene (3ea)

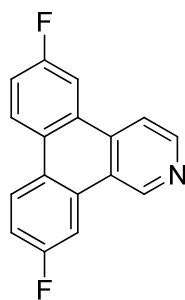

Method A: the reaction of 4,4'-difluoro-2-iodobiphenyl **1e-I** (63.2 mg, 0.2 mmol) with 3-chloropyridine-4-carboxylic acid **2a** (31.5 mg, 0.2 mmol) was carried out according to the general procedure to afford 38.2 mg (72% yield) of **3ea**. Method B:

the reaction of 4,4'-difluoro-2-bromobiphenyl **1e-Br** (53.8, 0.2 mmol) with 3-chloropyridine-4-carboxylic acid **2a** (31.5 mg, 0.2 mmol) was carried out according to the general procedure to afford 36.1 mg (68% yield) of **3ea**. White solid; mp 261.3–262.0 °C; IR (KBr,  $\text{cm}^{-1}$ )  $\nu_{\text{max}}$  1621, 1507, 1440, 1184, 793;  $^1\text{H}$  NMR (600 MHz,  $\text{CDCl}_3$ , ppm)  $\delta$  9.84 (s, 1H), 8.83 (d,  $J = 5.4$  Hz, 1H), 8.57–8.53 (m, 2H), 8.34 (dd,  $J_1 = 10.2$ ,  $J_2 = 2.4$  Hz, 1H), 8.24 (d,  $J = 6.0$  Hz, 1H), 8.22 (dd,  $J_1 = 10.2$ ,  $J_2 = 2.4$  Hz, 1H), 7.53–7.48 (m, 1H), 7.47–7.43 (m, 1H);  $^{13}\text{C}\{^1\text{H}\}$  NMR (150 MHz,  $\text{CDCl}_3$ , ppm)  $\delta$  162.2 (d,  $J = 246.6$  Hz), 162.0 (d,  $J = 246.0$  Hz), 147.0 (d,  $J = 4.2$  Hz), 134.9 (d,  $J = 3.45$  Hz), 129.5 (d,  $J = 8.55$  Hz), 128.9 (d,  $J = 7.65$  Hz), 127.4 (d,  $J = 1.8$  Hz), 126.1 (d,  $J = 1.65$  Hz), 125.7, 125.6, 125.6, 124.2 (d,  $J = 3.6$  Hz), 118.0 (d,  $J = 22.8$  Hz), 116.7 (d,  $J = 22.8$  Hz), 116.5, 109.4 (d,  $J = 22.65$  Hz), 108.3 (d,  $J = 22.65$  Hz); HRMS (ESI)  $m/z$ :  $[\text{M}+\text{H}]^+$  calcd for  $\text{C}_{17}\text{H}_{10}\text{F}_2\text{N}$  266.0781, Found 266.0785.

### 6,11-Dichloro-2-azatriphenylene (**3fa**)

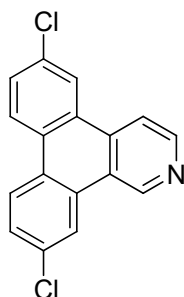

Method A: the reaction of 4,4'-dichloro-2-iodobiphenyl **1f-I** (69.8 mg, 0.2 mmol) with 3-chloropyridine-4-carboxylic acid **2a** (31.5 mg, 0.2 mmol) was carried out according to the general procedure to afford 35.8 mg (60% yield) of **3fa**. Method B: the reaction of 4,4'-dichloro-2-bromobiphenyl **1f-Br** (60.4, 0.2 mmol) with 3-chloropyridine-4-carboxylic acid **2a** (31.5 mg, 0.2 mmol) was carried out according to the general procedure to afford 45.3 mg (76% yield) of **3fa**. Yellow solid; mp 277.4–277.8 °C; IR (KBr,  $\text{cm}^{-1}$ )  $\nu_{\text{max}}$  1600, 1417, 1099, 757;  $^1\text{H}$  NMR (600 MHz,  $\text{CDCl}_3$ , ppm)  $\delta$  9.85 (s, 1H), 8.83 (d,  $J = 5.4$  Hz, 1H), 8.64 (d,  $J = 1.8$  Hz, 1H), 8.53 (d,  $J = 1.8$  Hz, 1H), 8.47 (t,  $J = 8.4$  Hz, 2H), 8.26 (d,  $J = 6.0$  Hz, 1H), 7.71 (dd,  $J_1 = 8.4$ ,  $J_2 = 1.8$  Hz, 1H), 7.65 (dd,  $J_1 = 9.0$ ,  $J_2 = 1.8$  Hz, 1H);  $^{13}\text{C}\{^1\text{H}\}$  NMR (150 MHz,  $\text{CDCl}_3$ , ppm)  $\delta$  147.2, 146.9, 134.5, 134.4, 134.2, 129.9, 129.3, 129.0, 128.8, 128.6, 127.7, 125.0, 124.9, 123.7, 123.7, 122.5, 116.3; HRMS (ESI)  $m/z$ :  $[\text{M}+\text{H}]^+$  calcd for  $\text{C}_{17}\text{H}_{10}\text{Cl}_2\text{N}$  298.0190, Found 298.0192.

### 6,11-Bis(trifluoromethyl)-2-azatriphenylene (**3ga**)

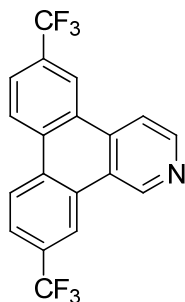

Method A: the reaction of 4,4'-bis(trifluoromethyl)-2-iodobiphenyl **1g-I** (83.2 mg, 0.2 mmol) with 3-chloropyridine-4-carboxylic acid **2a** (31.5 mg, 0.2 mmol) was carried out according to the general procedure to afford 56.3 mg (77% yield) of **3ga**. Method B: the reaction of 4,4'-bis(trifluoromethyl)-2-bromobiphenyl **1g-Br** (73.8, 0.2 mmol) with 3-chloropyridine-4-carboxylic acid **2a** (31.5 mg, 0.2 mmol) was carried out according to the general procedure to afford 56.3 mg (77% yield) of **3ga**. White solid; mp 227.3–227.8 °C; IR (KBr,  $\text{cm}^{-1}$ )  $\nu_{\text{max}}$  1323, 1114, 823;  $^1\text{H}$  NMR (600 MHz,  $\text{CDCl}_3$ , ppm)  $\delta$  9.97 (s, 1H), 8.96 (s, 1H), 8.91 (brs, 1H), 8.86 (s, 1H), 8.73 (t,  $J = 8.4$  Hz, 2H), 8.37 (d,  $J = 5.4$  Hz, 1H), 8.01 (d,  $J = 8.4$  Hz, 1H), 7.95 (d,  $J = 8.4$  Hz, 1H);  $^{13}\text{C}\{^1\text{H}\}$  NMR (150 MHz,  $\text{CDCl}_3$ , ppm)  $\delta$  147.6, 146.9, 134.7, 132.6, 131.2, 130.8 (q,  $J = 32.55$  Hz), 130.5 (q,  $J = 32.55$  Hz), 128.7, 128.2, 125.7 (q,  $J = 3.15$  Hz), 124.8, 124.8, 124.5 (q,  $J = 3.3$  Hz), 124.0 (q,  $J = 270.75$  Hz), 123.9 (q,  $J = 270.75$  Hz), 121.3 (q,  $J = 3.9$  Hz), 120.1 (q,  $J = 4.2$  Hz), 116.4; HRMS (ESI)  $m/z$ :  $[\text{M}+\text{H}]^+$  calcd for  $\text{C}_{19}\text{H}_{10}\text{F}_6\text{N}$  366.0717, Found 366.0722.

### Dimethyl 2-azatriphenylene-6,11-dicarboxylate (**3ha**)

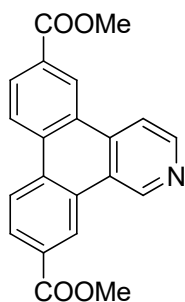

Method A: the reaction of dimethyl 2-iodobiphenyl-4,4'-dicarboxylate **1h-I** (79.2 mg, 0.2 mmol) with 3-chloropyridine-4-carboxylic acid **2a** (31.5 mg, 0.2 mmol) was carried out according to the general procedure to afford 46.3 mg (67% yield) of **3ha**. Method B: the reaction of dimethyl 2-bromobiphenyl-4,4'-dicarboxylate **1h-Br** (69.8, 0.2 mmol) with 3-chloropyridine-4-carboxylic acid **2a** (31.5 mg, 0.2 mmol) was carried out according to the general procedure to afford 50.4 mg (73% yield) of **3ha**. White solid; mp 263.6–264.3 °C; IR (KBr,  $\text{cm}^{-1}$ )  $\nu_{\text{max}}$  1732, 1266, 1115, 751;  $^1\text{H}$  NMR (600 MHz,  $\text{CDCl}_3$ , ppm)  $\delta$  9.93 (s, 1H), 9.29 (d,  $J = 1.8$  Hz, 1H), 9.20 (d,  $J = 1.8$  Hz, 1H), 8.82 (d,  $J = 6.0$  Hz, 1H), 8.57 (t,  $J = 8.4$  Hz, 2H), 8.38 (d,  $J = 5.4$  Hz, 1H), 8.32 (dd,  $J_1 = 8.4$ ,  $J_2 = 1.8$  Hz, 1H), 8.27 (dd,  $J_1 = 8.4$ ,  $J_2 = 1.8$  Hz, 1H), 4.07 (s, 3H), 4.06 (s, 3H);  $^{13}\text{C}\{^1\text{H}\}$  NMR (150 MHz,  $\text{CDCl}_3$ , ppm)  $\delta$  166.4, 166.3, 146.8, 146.6, 135.1, 133.6, 132.2, 130.0, 129.7, 129.6, 128.4, 128.3, 127.9, 125.8, 124.5,

124.2, 124.2, 116.5, 52.6; HRMS (ESI)  $m/z$ :  $[M+H]^+$  calcd for  $C_{21}H_{16}NO_4$  346.1079, Found 346.1086.

### 7,10-Dimethyl-2-azatriphenylene (3ia)

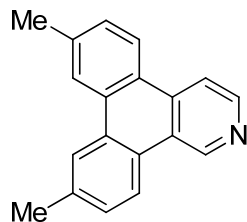

The reaction of 3',5-dimethyl-2-iodobiphenyl **1i-I** (61.6 mg, 0.2 mmol) with 3-chloropyridine-4-carboxylic acid **2a** (31.5 mg, 0.2 mmol) was carried out according to the general procedure to afford 44.3 mg (86% yield) of **3ia**. White solid; mp 143.8–144.5 °C; IR (KBr,  $cm^{-1}$ )  $\nu_{max}$  2918, 1617, 811;  $^1H$  NMR (600 MHz,  $CDCl_3$ , ppm)  $\delta$  9.80 (s, 1H), 8.67 (d,  $J = 5.4$  Hz, 1H), 8.49 (d,  $J = 7.8$  Hz, 1H), 8.36 (d,  $J = 7.8$  Hz, 1H), 8.29 (s, 1H), 8.28 (s, 1H), 8.19 (d,  $J = 5.4$  Hz, 1H), 7.43 (d,  $J = 9.6$  Hz, 1H), 7.41 (d,  $J = 9.0$  Hz, 1H), 2.58 (s, 3H), 2.57 (s, 3H);  $^{13}C\{^1H\}$  NMR (150 MHz,  $CDCl_3$ , ppm)  $\delta$  146.4, 145.7, 139.1, 137.6, 134.7, 131.0, 129.7, 129.0, 128.7, 125.7, 125.2, 124.2, 123.5, 123.2, 122.3, 116.0, 21.9, 21.8; HRMS (ESI)  $m/z$ :  $[M+H]^+$  calcd for  $C_{19}H_{16}N$  258.1283, Found 258.1288.

### 7,10-Di-*tert*-butyl-2-azatriphenylene (3ja)

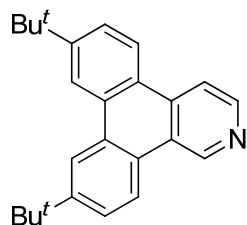

The reaction of 3',5-di-*tert*-butyl-2-iodobiphenyl **1j-I** (78.5 mg, 0.2 mmol) with 3-chloropyridine-4-carboxylic acid **2a** (31.5 mg, 0.2 mmol) was carried out according to the general procedure to afford 52.6 mg (77% yield) of **3ja**. Yellow solid; mp 209.8–210.6 °C; IR (KBr,  $cm^{-1}$ )  $\nu_{max}$  2964, 1615, 1266, 810;  $^1H$  NMR (600 MHz,  $CDCl_3$ , ppm)  $\delta$  9.92 (s, 1H), 8.73 (d,  $J = 6.0$  Hz, 1H), 8.68–8.65 (m, 3H), 8.55 (d,  $J = 8.4$  Hz, 1H), 8.33 (d,  $J = 5.4$  Hz, 1H), 7.77 (td,  $J_1 = 8.4$ ,  $J_2 = 1.8$  Hz, 2H), 1.52 (s, 18H);  $^{13}C\{^1H\}$  NMR (150 MHz,  $CDCl_3$ , ppm)  $\delta$  152.2, 150.8, 146.5, 145.8, 134.9, 131.2, 129.8, 125.8, 125.7, 125.4, 125.3, 124.4, 123.7, 122.5, 119.1, 119.1, 116.2, 35.3, 35.1, 31.4, 31.3; HRMS (ESI)  $m/z$ :  $[M+H]^+$  calcd for  $C_{25}H_{28}N$  342.2222, Found 342.2230.

### 7,10-Dimethoxy-2-azatriphenylene (3ka)

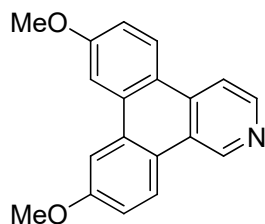

The reaction of 3',5-dimethoxy-2-iodobiphenyl **1k-I** (68.0 mg, 0.2 mmol) with 3-chloropyridine-4-carboxylic acid **2a** (31.5 mg, 0.2 mmol) was carried out according to the general procedure to afford 46.3 mg (80% yield) of **3ka**. White solid; mp 234.2–235.0 °C; IR (KBr,  $\text{cm}^{-1}$ )  $\nu_{\text{max}}$  1613, 1237, 1213, 1043, 814;  $^1\text{H}$  NMR (600 MHz,  $\text{CDCl}_3$ , ppm)  $\delta$  9.77 (s, 1H), 8.66 (d,  $J = 5.4$  Hz, 1H), 8.60 (d,  $J = 9.0$  Hz, 1H), 8.48 (d,  $J = 9.0$  Hz, 1H), 8.18 (d,  $J = 5.4$  Hz, 1H), 7.88 (s, 2H), 7.29 (dd,  $J_1 = 8.4$ ,  $J_2 = 2.4$  Hz, 1H), 7.26 (dd,  $J_1 = 8.4$ ,  $J_2 = 2.4$  Hz, 1H);  $^{13}\text{C}\{^1\text{H}\}$  NMR (150 MHz,  $\text{CDCl}_3$ , ppm)  $\delta$  160.3, 159.2, 146.1, 145.4, 134.1, 132.6, 131.1, 125.6, 124.2, 123.7, 122.3, 121.7, 116.0, 115.8, 115.8, 106.4, 106.2, 55.5; HRMS (ESI)  $m/z$ :  $[\text{M}+\text{H}]^+$  calcd for  $\text{C}_{19}\text{H}_{16}\text{NO}_2$  290.1181, Found 290.1189.

### 7,10-Dichloro-2-azatriphenylene (**3la**)

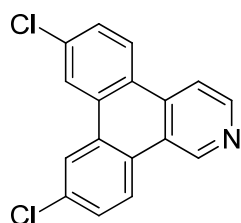

The reaction of 3',5-dichloro-2-iodobiphenyl **1l-I** (69.8 mg, 0.2 mmol) with 3-chloropyridine-4-carboxylic acid **2a** (31.5 mg, 0.2 mmol) was carried out according to the general procedure to afford 37.6 mg (63% yield) of **3la**. Yellow solid; mp 273.6–274.2 °C; IR (KBr,  $\text{cm}^{-1}$ )  $\nu_{\text{max}}$  1602, 797;  $^1\text{H}$  NMR (600 MHz,  $\text{CDCl}_3$ , ppm)  $\delta$  9.89 (s, 1H), 8.81 (d,  $J = 6.0$  Hz, 1H), 8.65 (d,  $J = 9.0$  Hz, 1H), 8.54 (d,  $J = 8.4$  Hz, 1H), 8.50 (d,  $J = 2.4$  Hz, 1H), 8.49 (d,  $J = 2.4$  Hz, 1H), 8.29 (d,  $J = 5.4$  Hz, 1H), 7.69 (dd,  $J_1 = 9.0$ ,  $J_2 = 2.4$  Hz, 1H), 7.68 (dd,  $J_1 = 9.0$ ,  $J_2 = 2.4$  Hz, 1H);  $^{13}\text{C}\{^1\text{H}\}$  NMR (150 MHz,  $\text{CDCl}_3$ , ppm)  $\delta$  146.9, 146.8, 136.1, 134.6, 134.4, 131.6, 130.3, 128.9, 128.6, 126.9, 126.4, 125.5, 124.3, 123.8, 123.4, 123.4, 116.3; HRMS (ESI)  $m/z$ :  $[\text{M}+\text{H}]^+$  calcd for  $\text{C}_{17}\text{H}_{10}\text{Cl}_2\text{N}$  298.0190, Found 298.0196.

### 7,10-Bis(trifluoromethyl)-2-azatriphenylene (**3ma**)

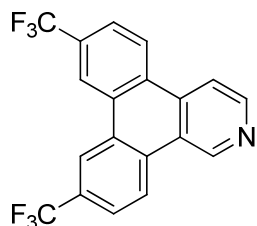

The reaction of 3',5-bis(trifluoromethyl)-2-iodobiphenyl **1m-I** (83.2 mg, 0.2 mmol) with 3-chloropyridine-4-carboxylic acid **2a** (31.5 mg, 0.2 mmol) was carried out

according to the general procedure to afforded 55.5 mg (76% yield) of **3ma**. White solid; mp 241.6–242.2 °C; IR (KBr,  $\text{cm}^{-1}$ )  $\nu_{\text{max}}$  1357, 1330, 1115, 819;  $^1\text{H}$  NMR (600 MHz,  $\text{CDCl}_3$ , ppm)  $\delta$  9.90 (s, 1H), 8.88 (d,  $J = 5.4$  Hz, 1H), 8.74 (d,  $J = 7.8$  Hz, 3H), 8.65 (d,  $J = 8.4$  Hz, 1H), 8.30 (d,  $J = 6.0$  Hz, 1H), 7.93 (d,  $J = 8.4$  Hz, 2H);  $^{13}\text{C}\{^1\text{H}\}$  NMR (150 MHz,  $\text{CDCl}_3$ , ppm)  $\delta$  147.8, 147.3, 134.5, 131.5 (q,  $J = 32.55$  Hz), 130.7, 130.3, 130.27 (q,  $J = 32.55$  Hz), 130.1, 128.9, 124.8, 124.8, 124.5 (q,  $J = 3.3$  Hz), 124.0 (q,  $J = 270.75$  Hz), 123.9 (q,  $J = 273.75$  Hz), 123.8, 123.6, 120.6 (q,  $J = 3.45$  Hz), 116.5; HRMS (ESI)  $m/z$ :  $[\text{M}+\text{H}]^+$  calcd for  $\text{C}_{19}\text{H}_{10}\text{F}_6\text{N}$  366.0717, Found 366.0718.

### Dimethyl 2-azatriphenylene-7,10-dicarboxylate (**3na**)

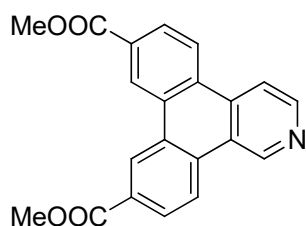

The reaction of dimethyl 6-iodobiphenyl-3,3'-dicarboxylate **1n-I** (79.2 mg, 0.2 mmol) with 3-chloropyridine-4-carboxylic acid **2a** (31.5 mg, 0.2 mmol) was carried out according to the general procedure to afforded 43.5 mg (63% yield) of **3aa**. White solid; mp 282.6–283.0 °C; IR (KBr,  $\text{cm}^{-1}$ )  $\nu_{\text{max}}$  1727, 1251, 761;  $^1\text{H}$  NMR (600 MHz,  $\text{CDCl}_3$ , ppm)  $\delta$  9.88 (s, 1H), 9.23 (s, 2H), 8.82 (d,  $J = 6.0$  Hz, 1H), 8.66 (d,  $J = 9.0$  Hz, 1H), 8.55 (d,  $J = 8.4$  Hz, 1H), 8.29–8.24 (m, 3H), 4.078 (s, 3H), 4.076 (s, 3H);  $^{13}\text{C}\{^1\text{H}\}$  NMR (150 MHz,  $\text{CDCl}_3$ , ppm)  $\delta$  166.6, 166.5, 147.5, 147.4, 134.9, 131.4, 130.7, 130.7, 130.6, 129.5, 129.3, 128.4, 128.0, 125.4, 125.4, 124.2, 123.9, 122.7, 116.7, 52.6, 52.5; HRMS (ESI)  $m/z$ :  $[\text{M}+\text{H}]^+$  calcd for  $\text{C}_{21}\text{H}_{16}\text{NO}_4$  346.1079, Found 346.1087.

### 6,7,10,11-tetramethyl-2-azatriphenylene (**3oa**)

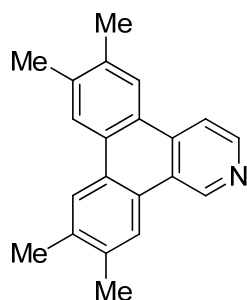

Method A: the reaction of 3',4,4',5-tetramethyl-2-iodobiphenyl **1o-I** (67.2 mg, 0.2 mmol) with 3-chloropyridine-4-carboxylic acid **2a** (31.5 mg, 0.2 mmol) was carried out according to the general procedure to afforded 52.5 mg (92% yield) of **3oa**. Method B: the reaction of 3',4,4',5-tetramethyl-2-bromobiphenyl **1o-Br** (57.8, 0.2 mmol) with 3-chloropyridine-4-carboxylic acid **2a** (31.5 mg, 0.2 mmol) was carried out according to the general procedure to afforded 33.1 mg (58% yield) of **3oa**. White solid; mp 227.6–228.3 °C; IR (KBr,  $\text{cm}^{-1}$ )  $\nu_{\text{max}}$  2963, 1596, 1446, 1414, 863, 816;  $^1\text{H}$

NMR (600 MHz, CDCl<sub>3</sub>, ppm)  $\delta$  9.81 (s, 1H), 8.67 (d,  $J$  = 6.0 Hz, 1H), 8.34 (s, 1H), 8.22-8.19 (m, 4H), 2.47 (s, 9H), 2.45 (s, 3H); <sup>13</sup>C{<sup>1</sup>H} NMR (150 MHz, CDCl<sub>3</sub>, ppm)  $\delta$  146.4, 145.5, 138.3, 136.8, 136.2, 135.9, 134.6, 129.2, 127.9, 125.8, 125.2, 124.2, 124.0, 123.6, 123.6, 122.9, 116.0, 20.4, 20.3, 20.2, 20.1; HRMS (ESI)  $m/z$ : [M+H]<sup>+</sup> calcd for C<sub>21</sub>H<sub>20</sub>N 286.1596, Found 286.1603.

### 6,7,10,11-Tetrakis(hexyloxy)-2-azatriphenylene (3pa)

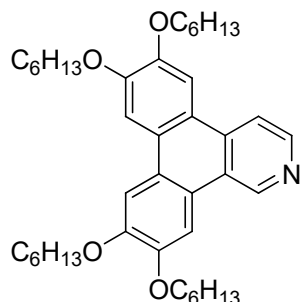

Method A: the reaction of 3',4,4',5-tetrakis(hexyloxy)-2-iodobiphenyl **1p-I** (136.1 mg, 0.2 mmol) with 3-chloropyridine-4-carboxylic acid **2a** (31.5 mg, 0.2 mmol) was carried out according to the general procedure to afford 104.6 mg (83% yield) of **3pa**. Method B: the reaction of 3',4,4',5-tetrakis(hexyloxy)-2-bromobiphenyl **1p-Br** (126.7, 0.2 mmol) with 3-chloropyridine-4-carboxylic acid **2a** (31.5 mg, 0.2 mmol) was carried out according to the general procedure to afford 60.5 mg (48% yield) of **3pa**. Yellow solid; mp 170.8–171.5 °C; IR (KBr, cm<sup>-1</sup>)  $\nu_{max}$  2954, 2927, 2853, 1615, 1514, 1435, 1266, 1179; <sup>1</sup>H NMR (600 MHz, CDCl<sub>3</sub>, ppm)  $\delta$  9.78 (s, 1H), 8.67 (d,  $J$  = 5.4 Hz, 1H), 8.20 (d,  $J$  = 6.0 Hz, 1H), 8.07 (s, 1H), 7.94 (s, 1H), 7.81 (s, 1H), 7.80 (s, 1H), 4.28-4.21 (m, 8H), 1.99-1.93 (m, 8H), 1.62-1.5 (m, 8H), 1.45-1.36 (m, 16H), 0.94 (t,  $J$  = 7.2 Hz, 12H); <sup>13</sup>C{<sup>1</sup>H} NMR (150 MHz, CDCl<sub>3</sub>, ppm)  $\delta$  151.1, 149.9, 149.5, 149.1, 146.2, 144.6, 134.0, 126.0, 124.2, 123.7, 121.9, 121.0, 115.9, 106.8, 106.7, 106.2, 105.5, 69.6, 69.4, 69.3, 69.2, 31.6, 31.6, 29.3, 29.2, 25.8, 25.8, 22.6, 14.0; HRMS (ESI)  $m/z$ : [M+H]<sup>+</sup> calcd for C<sub>41</sub>H<sub>60</sub>NO<sub>4</sub> 630.4522, Found 630.4518.

### 3-Chloro-2-azatriphenylene (3ab)

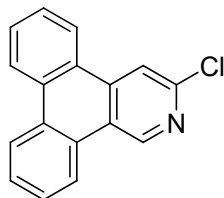

Method A: the reaction of 2-iodobiphenyl **1a-I** (56.0 mg, 0.2 mmol) with 2,5-dichloropyridine-4-carboxylic acid (38.4 mg, 0.2 mmol) was carried out according to the general procedure to afford 31.1 mg (59% yield) of **3ab**. Method B: the reaction of 2-iodobiphenyl **1a-I** (56.0 mg, 0.2 mmol) with 2,4-dichloropyridine-5-carboxylic acid (38.4 mg, 0.2 mmol) was carried out according to the general procedure to afford 29.0 mg (55% yield) of **3ab**. White solid; mp 160.6–161.2 °C; IR (KBr, cm<sup>-1</sup>)  $\nu_{max}$  1611, 1107, 747; <sup>1</sup>H NMR (600 MHz, CDCl<sub>3</sub>, ppm)  $\delta$  9.64 (s, 1H), 8.62-8.58 (m, 3H), 8.49 (d,  $J$  = 7.8 Hz, 1H), 8.33 (s, 1H), 7.78 (t,

$J = 7.2$  Hz, 1H), 7.73-7.67 (m, 3H);  $^{13}\text{C}\{^1\text{H}\}$  NMR (150 MHz,  $\text{CDCl}_3$ , ppm)  $\delta$  149.1, 146.9, 137.9, 131.6, 130.0, 129.7, 128.4, 128.1, 127.7, 127.4, 126.6, 123.9, 123.6, 123.5, 122.5, 116.4; HRMS (ESI)  $m/z$ :  $[\text{M}+\text{H}]^+$  calcd for  $\text{C}_{17}\text{H}_{11}\text{ClN}$  264.0580, Found 264.0582.

### 3-Methyl-2-azatriphenylene (3ac)

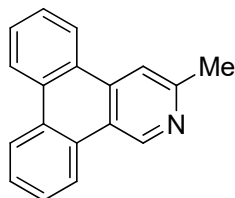

The reaction of 2-iodobiphenyl **1a-I** (56.0 mg, 0.2 mmol) with 5-chloro-2-methylpyridine-4-carboxylic acid **2a** (34.3 mg, 0.2 mmol) was carried out according to the general procedure to afford 35.5 mg (73% yield) of **3ac**. Yellow solid; mp 122.5–123.3 °C; IR (KBr,  $\text{cm}^{-1}$ )  $\nu_{\text{max}}$  1602, 1435, 755, 717;  $^1\text{H}$  NMR (600 MHz,  $\text{CDCl}_3$ , ppm)  $\delta$  9.85 (s, 1H), 8.72-8.70 (m, 1H), 8.67-8.61 (m, 3H), 8.23 (s, 1H), 7.76 (t,  $J = 7.8$  Hz, 1H), 7.71-7.68 (m, 3H), 2.81 (s, 3H);  $^{13}\text{C}\{^1\text{H}\}$  NMR (150 MHz,  $\text{CDCl}_3$ , ppm)  $\delta$  155.1, 146.2, 135.7, 131.4, 129.5, 129.2, 128.3, 127.8, 127.6, 127.5, 127.4, 123.7, 123.4, 123.4, 122.4, 122.3, 115.2, 24.6; HRMS (ESI)  $m/z$ :  $[\text{M}+\text{H}]^+$  calcd for  $\text{C}_{18}\text{H}_{14}\text{N}$  244.1126, Found 244.1131.

### 1-Azatriphenylene (3ad)

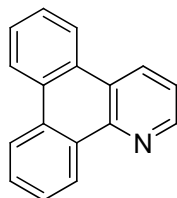

Method A: the reaction of 2-iodobiphenyl **1a-I** (56.0 mg, 0.2 mmol) with 2-chloropyridine-3-carboxylic acid (31.5 mg, 0.2 mmol) was carried out according to the general procedure to afford 13.8 mg (30% yield) of **3ad**. Method B: the reaction of 2-iodobiphenyl **1a-I** (56.0 mg, 0.2 mmol) with 3-chloropyridine-2-carboxylic acid (31.5 mg, 0.2 mmol) was carried out according to the general procedure to afford 10.5 mg (23% yield) of **3ad**. White solid; mp 171.5–172.0 °C; IR (KBr,  $\text{cm}^{-1}$ )  $\nu_{\text{max}}$  1406, 754;  $^1\text{H}$  NMR (600 MHz,  $\text{CDCl}_3$ , ppm)  $\delta$  9.33-9.31 (m, 1H), 8.96 (dd,  $J_1 = 4.2$ ,  $J_2 = 1.2$  Hz, 1H), 8.83 (dd,  $J_1 = 8.4$ ,  $J_2 = 1.8$  Hz, 1H), 8.64 (d,  $J = 8.4$  Hz, 1H), 8.60 (dd,  $J_1 = 7.2$ ,  $J_2 = 2.4$  Hz, 1H), 8.53 (dd,  $J_1 = 7.8$ ,  $J_2 = 0.6$  Hz, 1H), 7.76-7.71 (m, 2H), 7.70-7.63 (m, 2H), 7.55 (dd,  $J_1 = 7.8$ ,  $J_2 = 4.2$  Hz, 1H);  $^{13}\text{C}\{^1\text{H}\}$  NMR (150 MHz,  $\text{CDCl}_3$ , ppm)  $\delta$  148.8, 146.4, 131.3, 130.8, 130.8, 129.7, 128.8, 128.7, 127.8, 127.5, 127.3, 125.3, 124.4, 123.4, 123.2, 122.5, 122.1; HRMS (ESI)  $m/z$ :  $[\text{M}+\text{H}]^+$  calcd for  $\text{C}_{17}\text{H}_{12}\text{N}$  230.0970, Found 230.0970.

## Synthesis of compounds 5



The compound **5** was synthesized according to the methods described in the literature.<sup>16</sup> Compound **5** is known, and the data are consistent with the literature.<sup>16</sup>

## References

1. C. Zhu, D. Wang, D. Wang, Y. Zhao, W.-Y. Sun, Z. Shi, *Angew. Chem., Int. Ed.*, 2018, **57**, 8848–8853.
2. J. B. Lee, M. H. Jeon, J. K. Seo, G. V. Helden, J.-U. Rohde, B. S. Zhao, J. Seo, S. Y. Hong, *Org. Lett.*, 2019, **21**, 7004–7008.
3. M. Tashiro, T. Yamato, *J. Org. Chem.*, 1979, **44**, 3037–3041.
4. S. Pan, H. Jiang, Y. Zhang, D. Chen, Y. Zhang, *Org. Lett.*, 2016, **18**, 5192–5195.
5. M. R. Bryant, C. Richardson, *Dalton Trans.*, 2020, **49**, 5167–5174.
6. M.-Y. Fang, L.-P. Chen, L. Huang, D.-M. Fang, X.-Z. Chen, B.-Q. Wang, C. Feng, S.-K. Xiang, *J. Org. Chem.*, 2021, **86**, 9096–9106.
7. L. Huang, L.-P. Chen, Y. Du, M.-Y. Fang, B.-Q. Wang, C. Feng and S.-K. Xiang, *Org. Lett.*, 2021, **23**, 7535–7539.
8. P. Li, Q. Li, H. Weng, J. Diao, H. Yao and A. Lin, *Org. Lett.*, 2019, **21**, 6765–6769.
9. K.-Q. Zhao, J.-Q. Du, X.-H. Long, M. Jing, B.-Q. Wang, P. Hu, H. Monobe, B. Henrich and B. Donnio, *Dyes Pigm.*, 2017, **143**, 252–260.
10. D. M. E. Freeman, A. J. Musser, J. M. Frost, H. L. Stern, A. K. Forster, K. J. Fallon, A. G. Rapidis, F. Cacialli, I. McCulloch, T. M. Clarke, R. H. Friend and H. Bronstein, *J. Am. Chem. Soc.*, 2017, **139**, 11073–11080.
11. A. Pradhan, P. Dechambenoit, H. Bock, F. Durola, *Angew. Chem. Int. Ed.*, 2011, **50**, 12582–12585.
12. N. Suzuki, T. Fujita and J. Ichikawa, *Org. Lett.*, 2015, **17**, 4984–4987.
13. U. Fluch, B. D. McCarthy and S. Ott, *Dalton Trans.*, 2019, **48**, 45–49.
14. S. Y. Lee, J. C. Kim, 2022, US2022009943A1.
15. G. Shi, D. Chen, H. Jiang, Y. Zhang and Y. Zhang, *Org. Lett.*, 2016, **18**, 2958–2961.
16. C. Shao, B. Zhou, Z. Wu, X. Ji and Y. Zhang, *Adv. Synth. Catal.*, 2018, **360**, 887–892.

Figure S1. <sup>1</sup>H NMR spectrum (600 MHz, CDCl<sub>3</sub>) of 1p-I

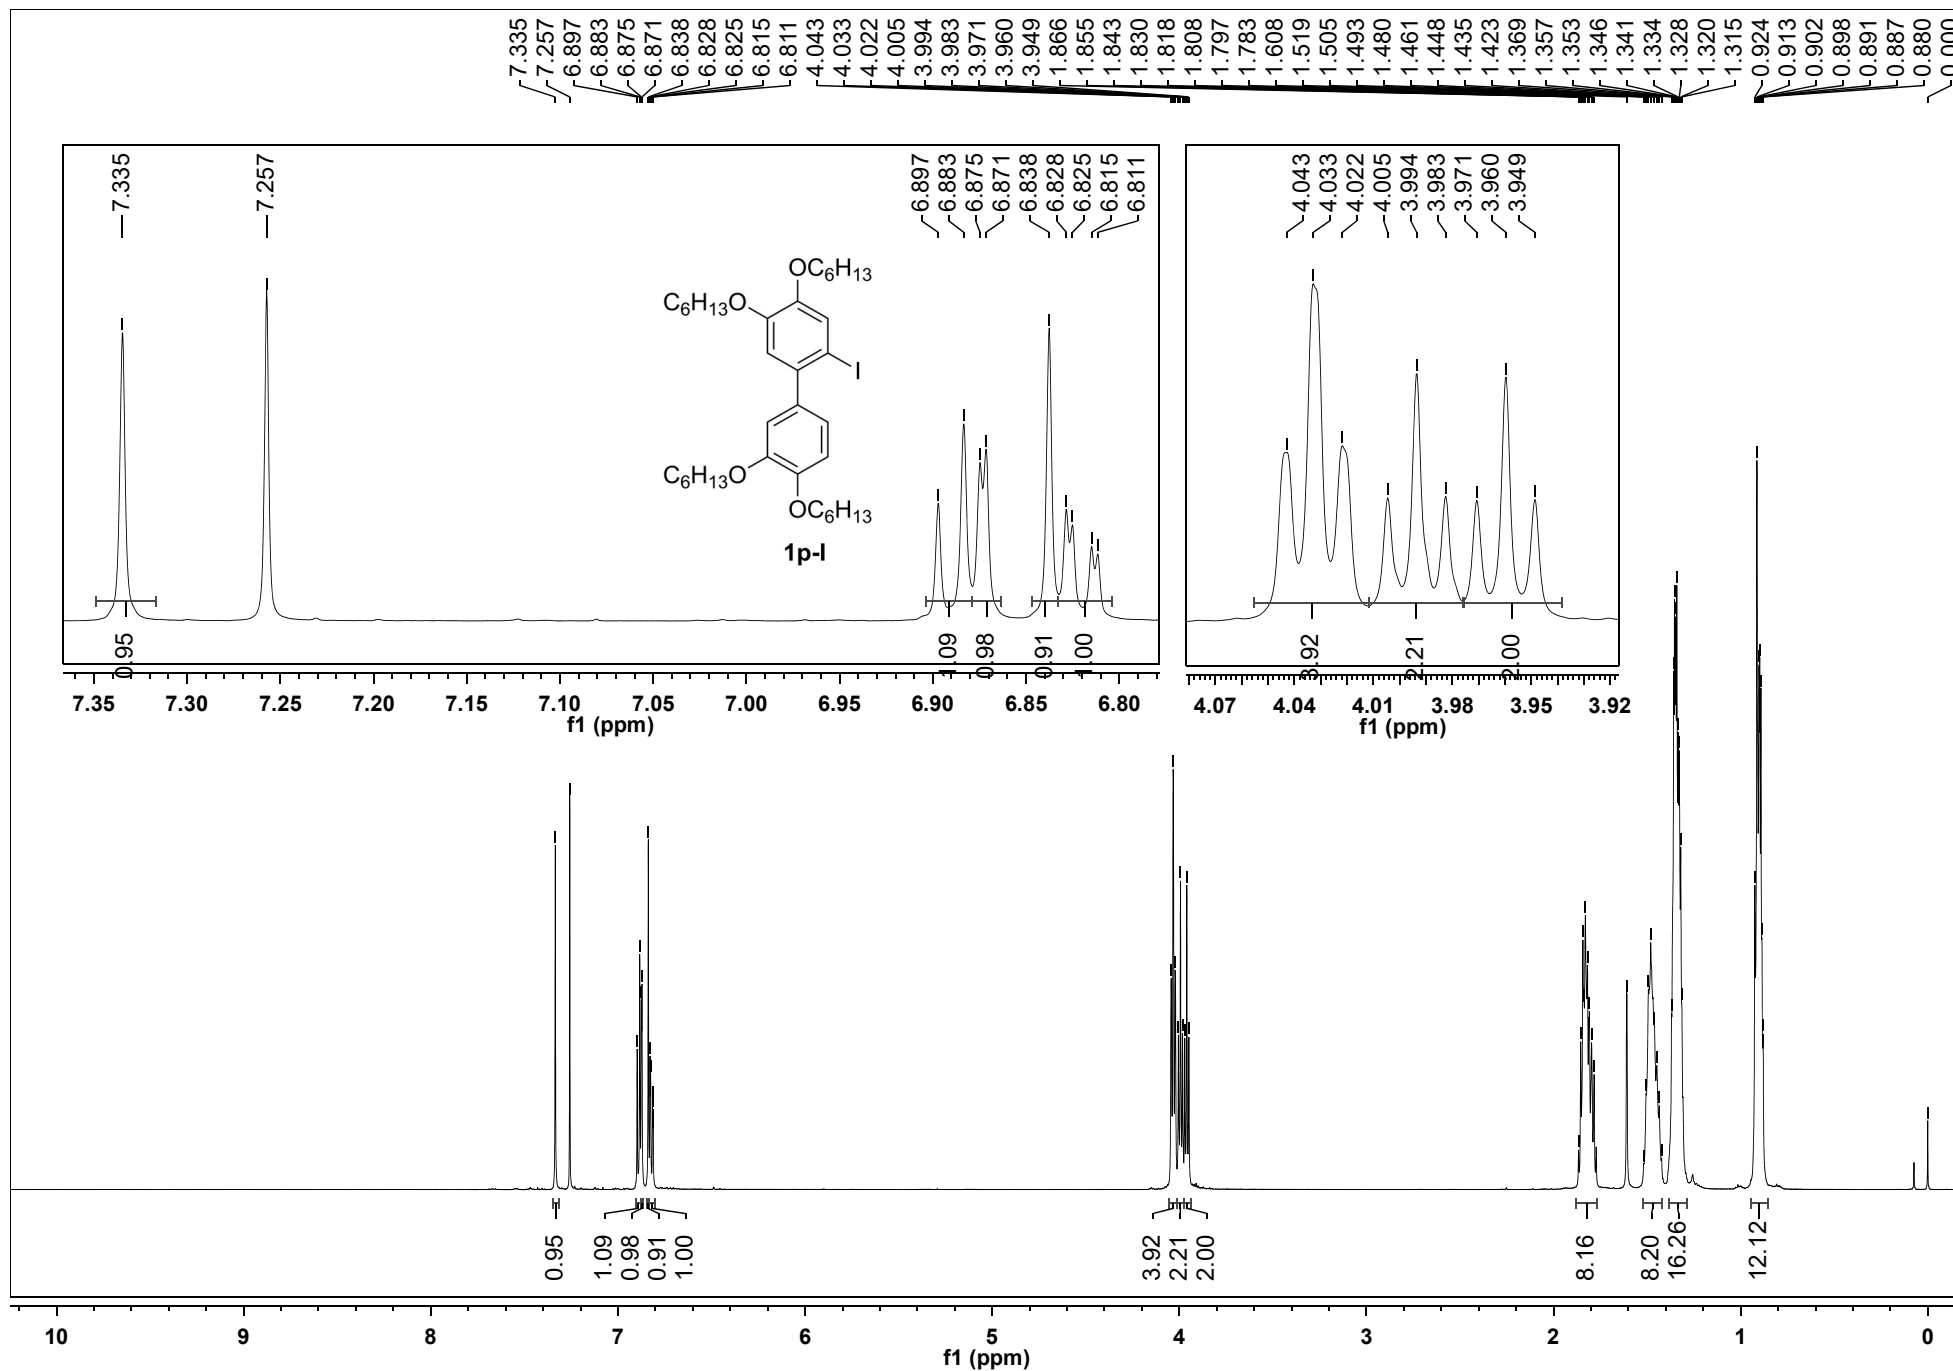

Figure S2.  $^{13}\text{C}\{^1\text{H}\}$  NMR spectrum (150 MHz,  $\text{CDCl}_3$ ) of 1p-I

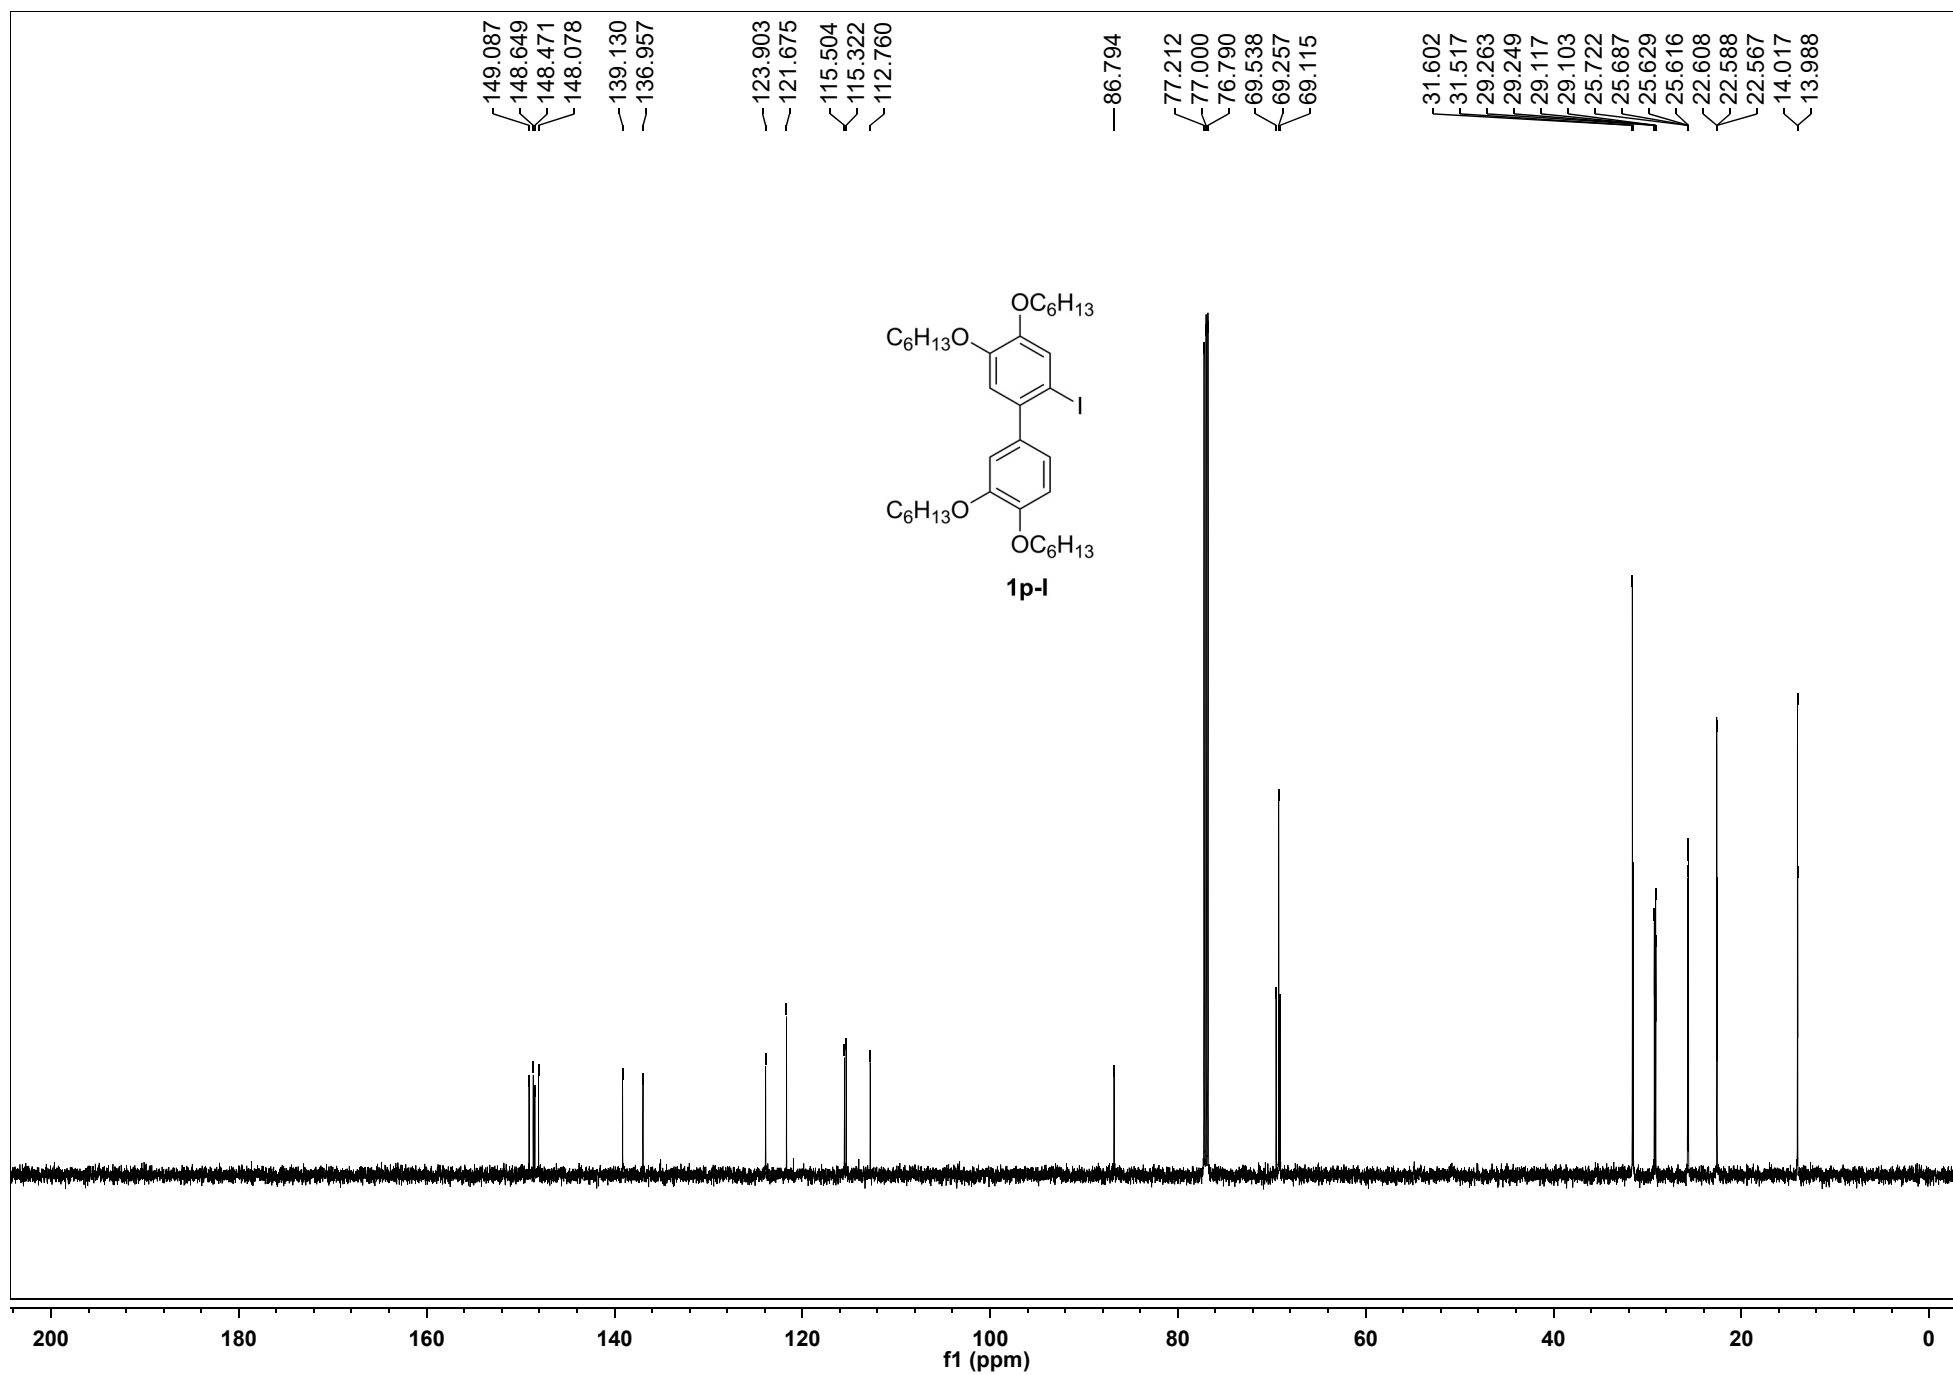

Figure S3. <sup>1</sup>H NMR spectrum (600 MHz, CDCl<sub>3</sub>) of 1d-Br

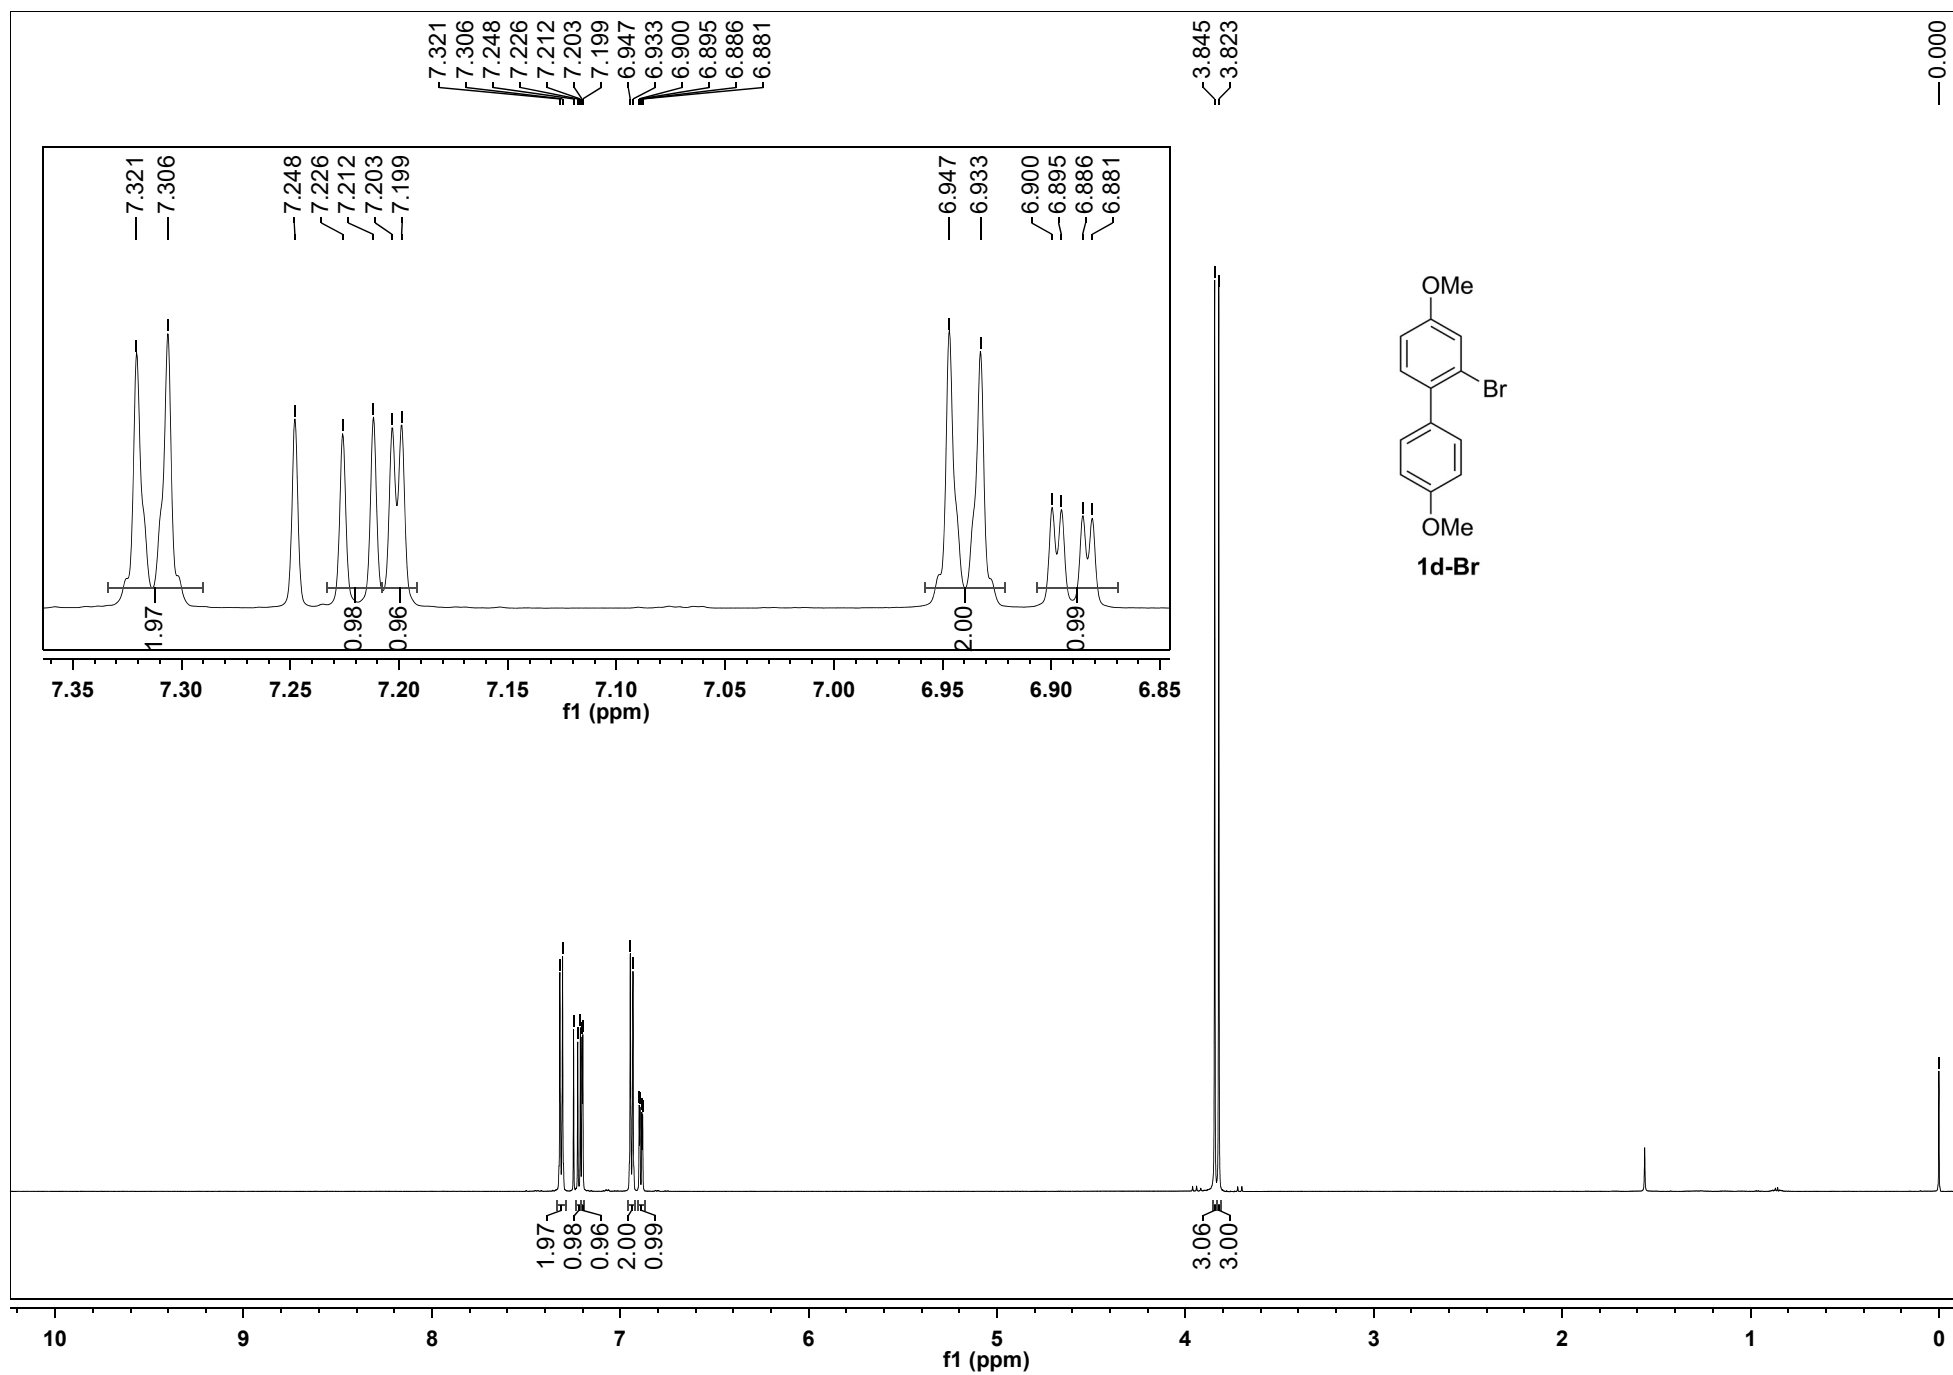

Figure S4.  $^{13}\text{C}\{^1\text{H}\}$  NMR spectrum (150 MHz,  $\text{CDCl}_3$ ) of 1d-Br

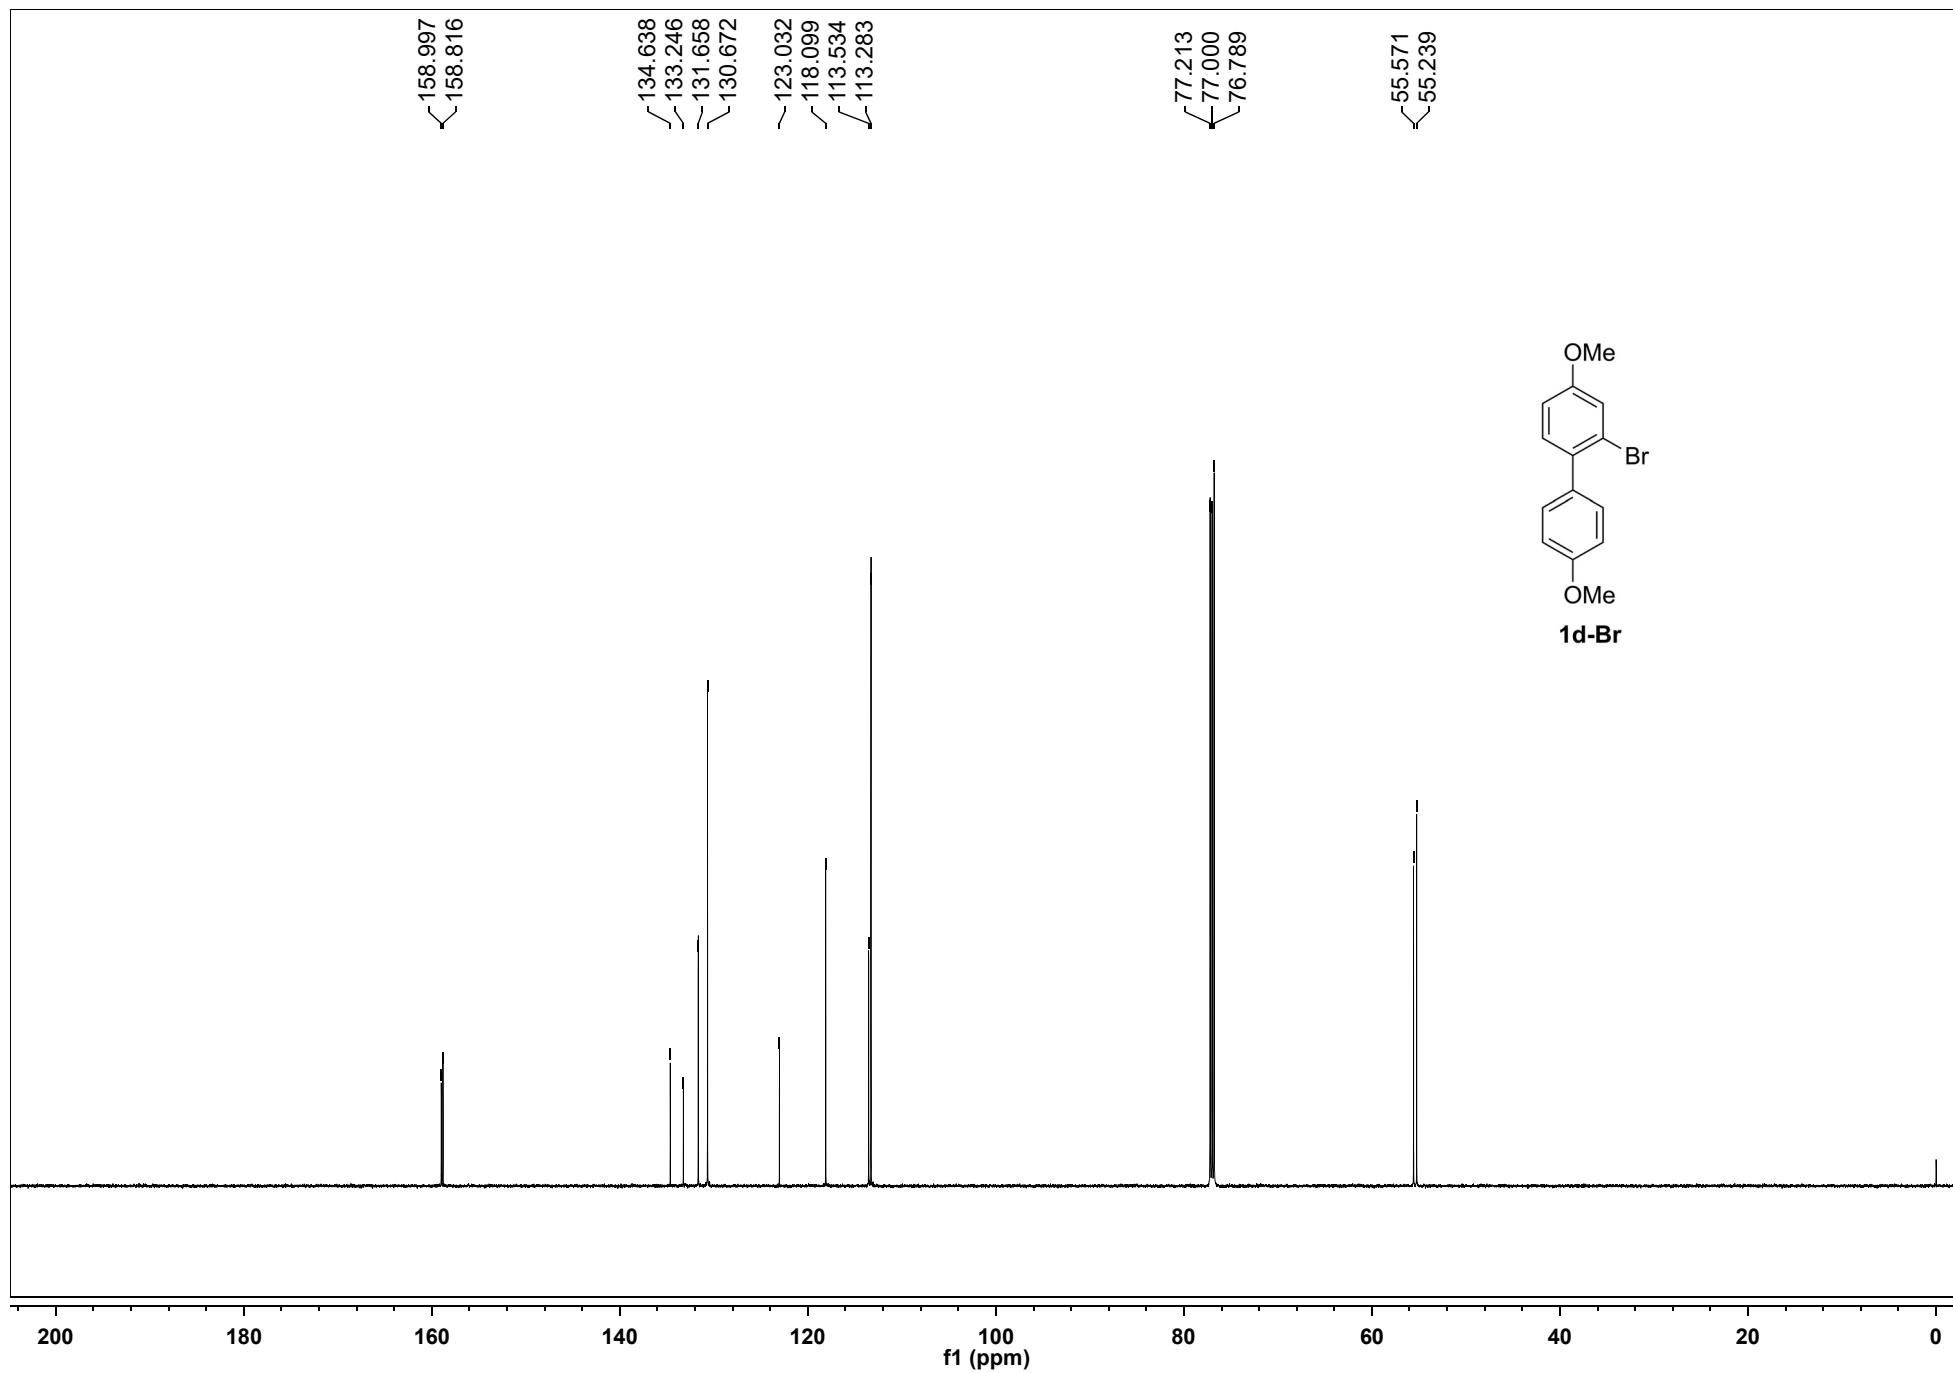

Figure S5. <sup>1</sup>H NMR spectrum (600 MHz, CDCl<sub>3</sub>) of 1g-Br

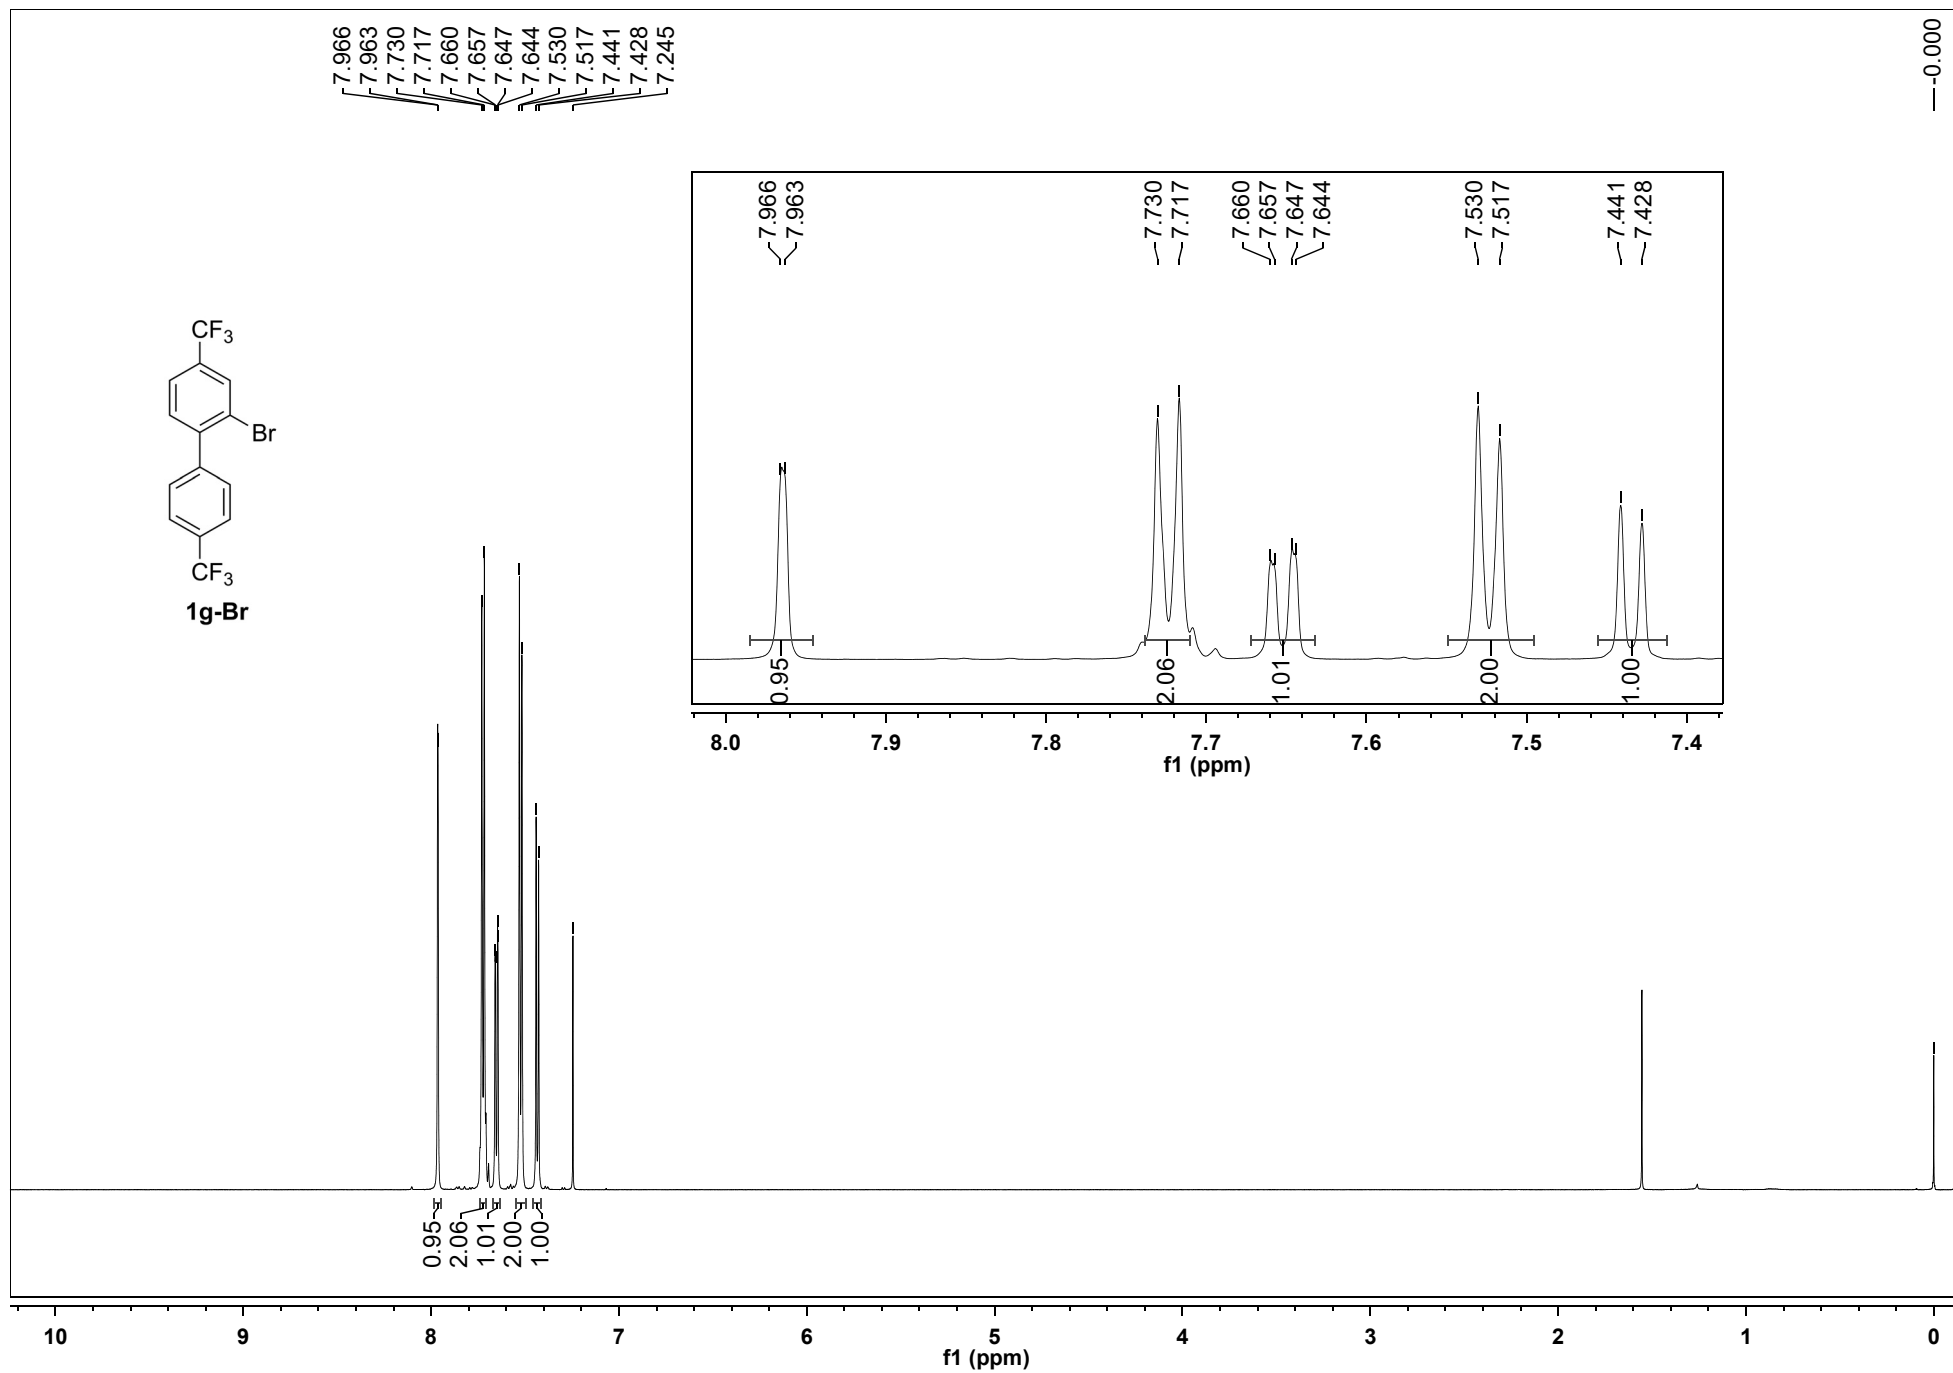

Figure S6.  $^{13}\text{C}\{^1\text{H}\}$  NMR spectrum (150 MHz,  $\text{CDCl}_3$ ) of 1g-Br

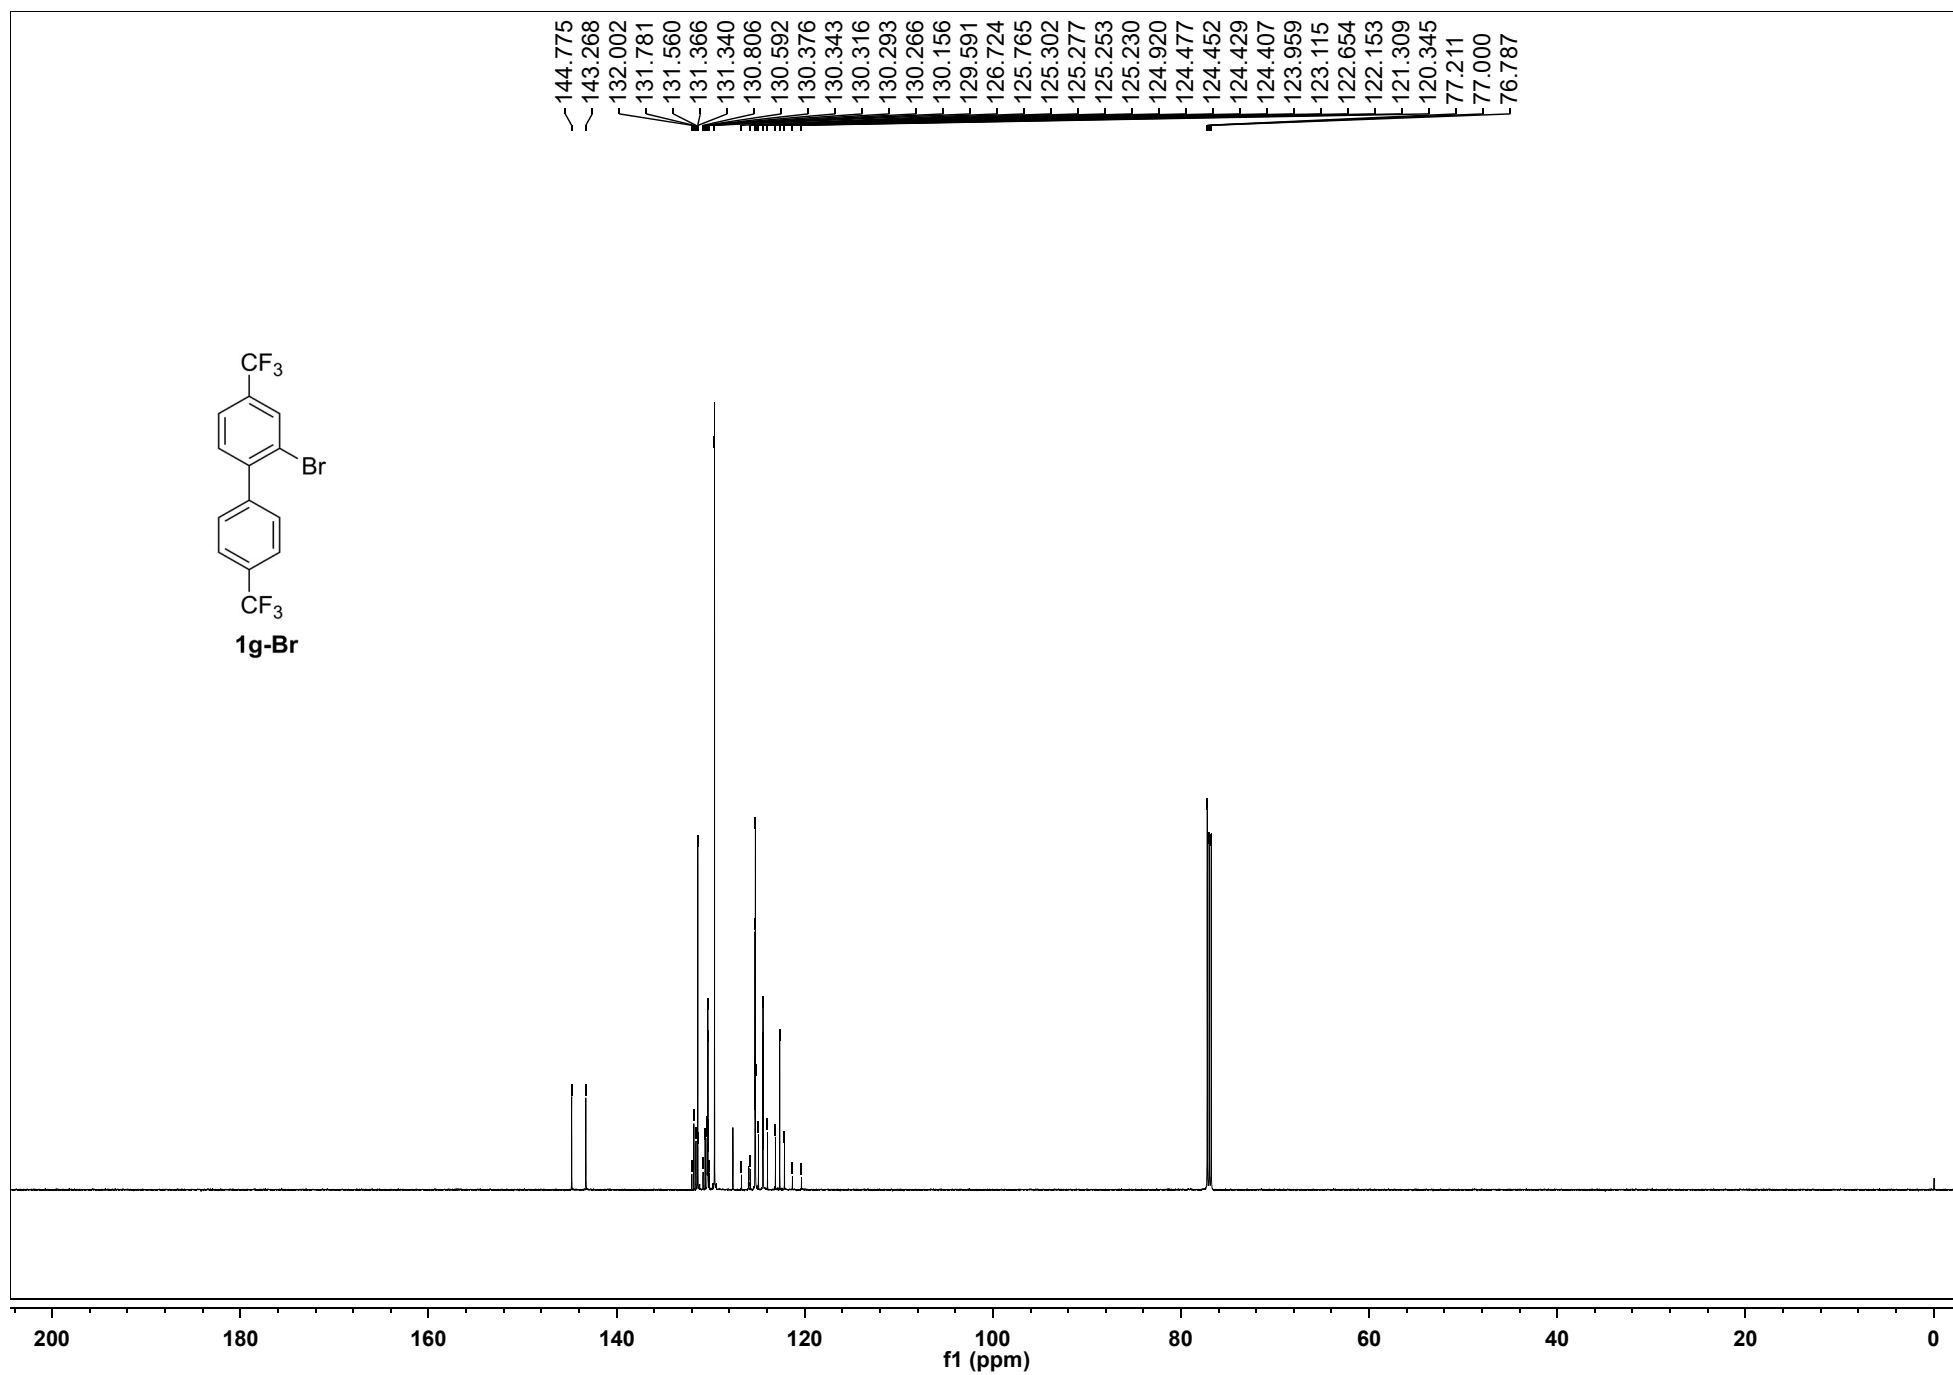

Figure S7. <sup>1</sup>H NMR spectrum (600 MHz, CDCl<sub>3</sub>) of 3aa

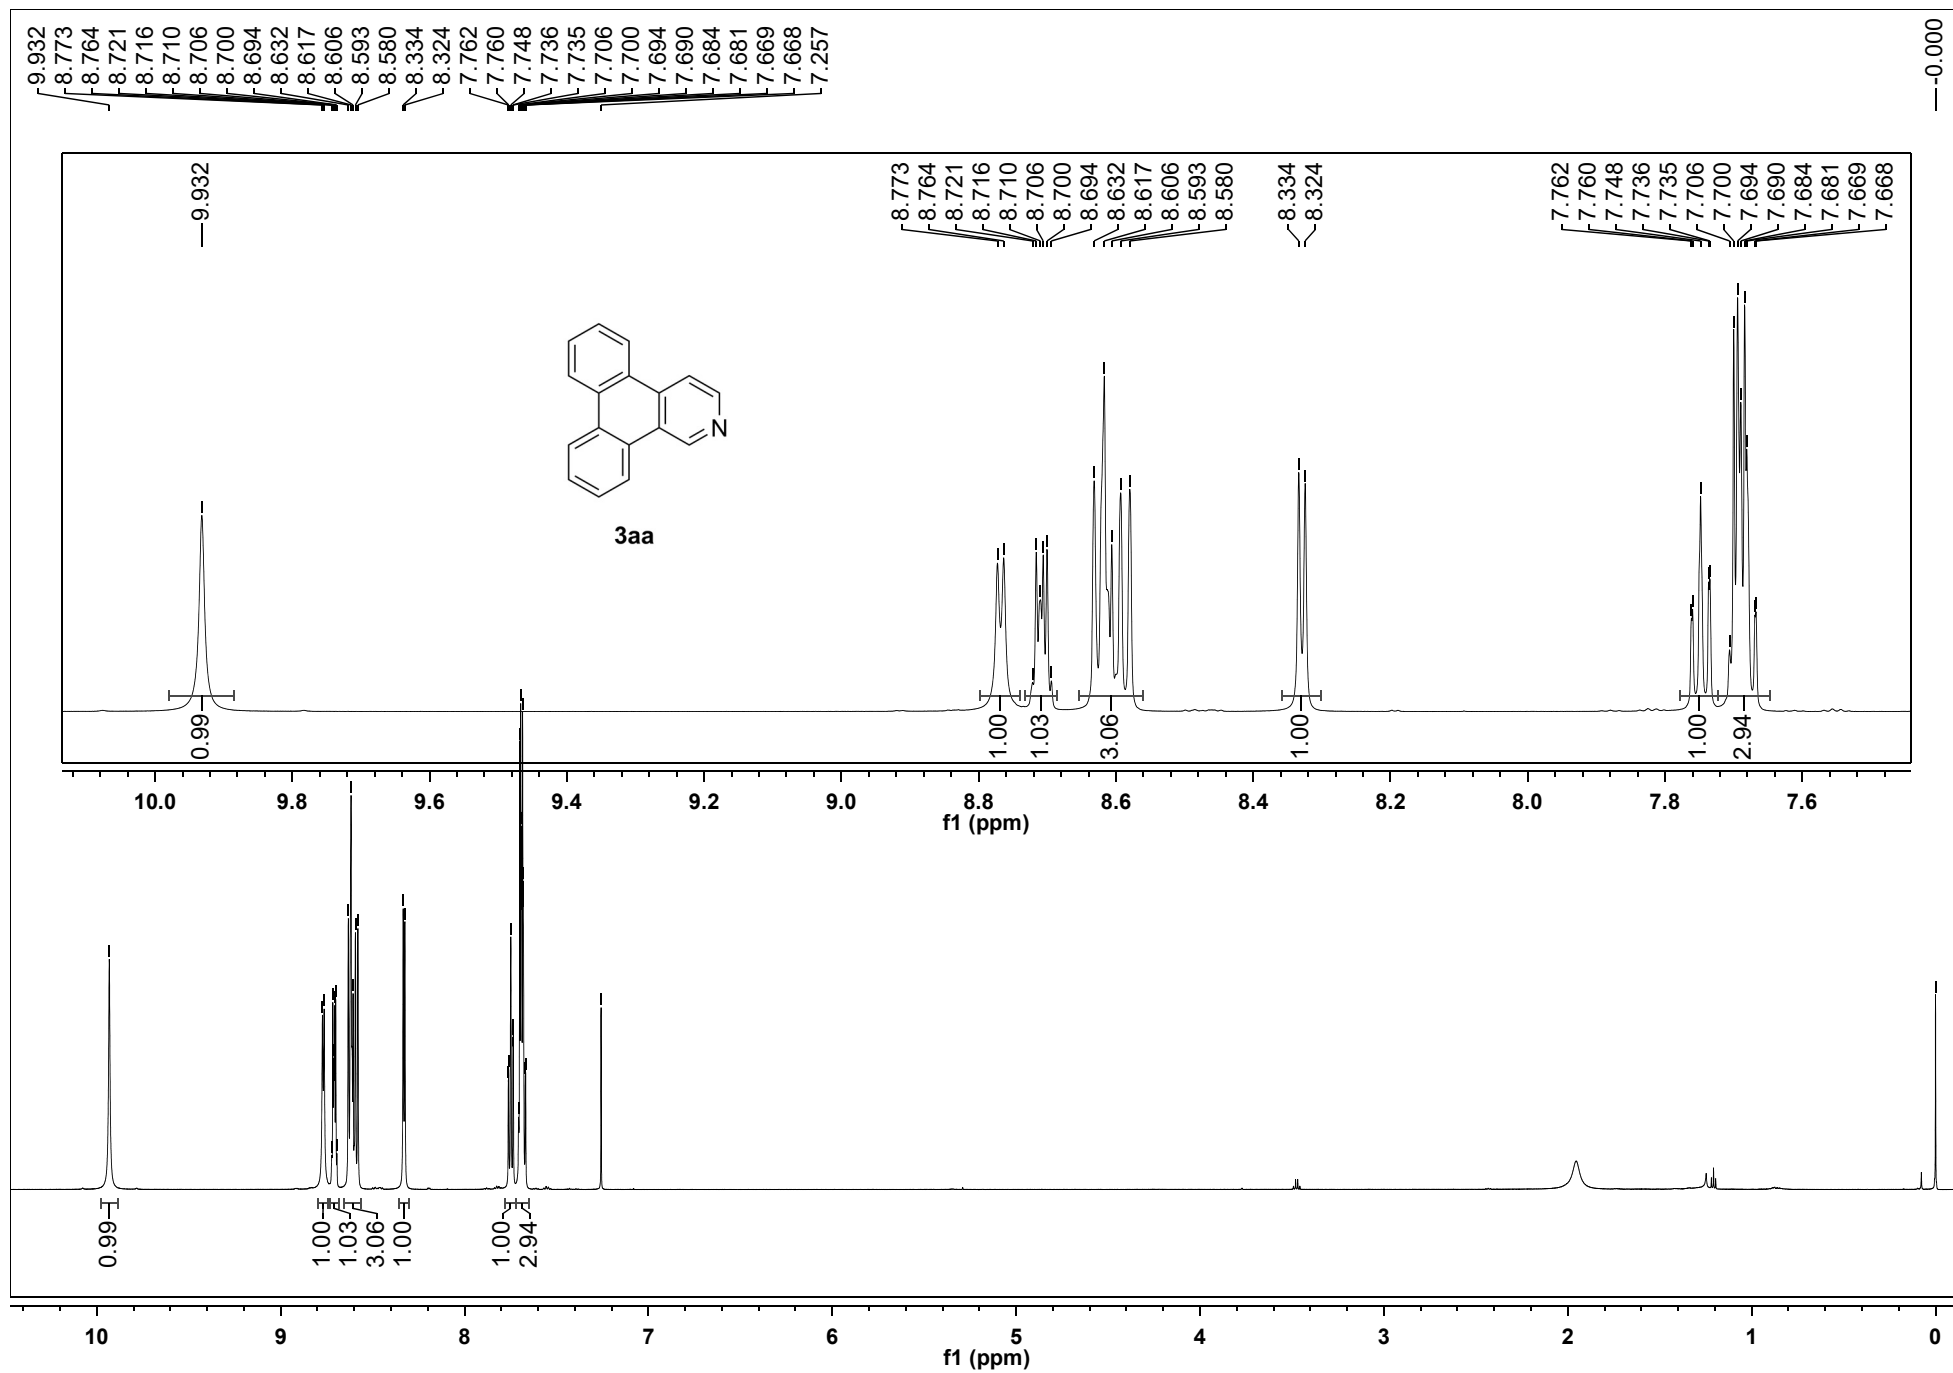



Figure S8.  $^{13}\text{C}\{^1\text{H}\}$  NMR spectrum (150 MHz,  $\text{CDCl}_3$ ) of 3aa

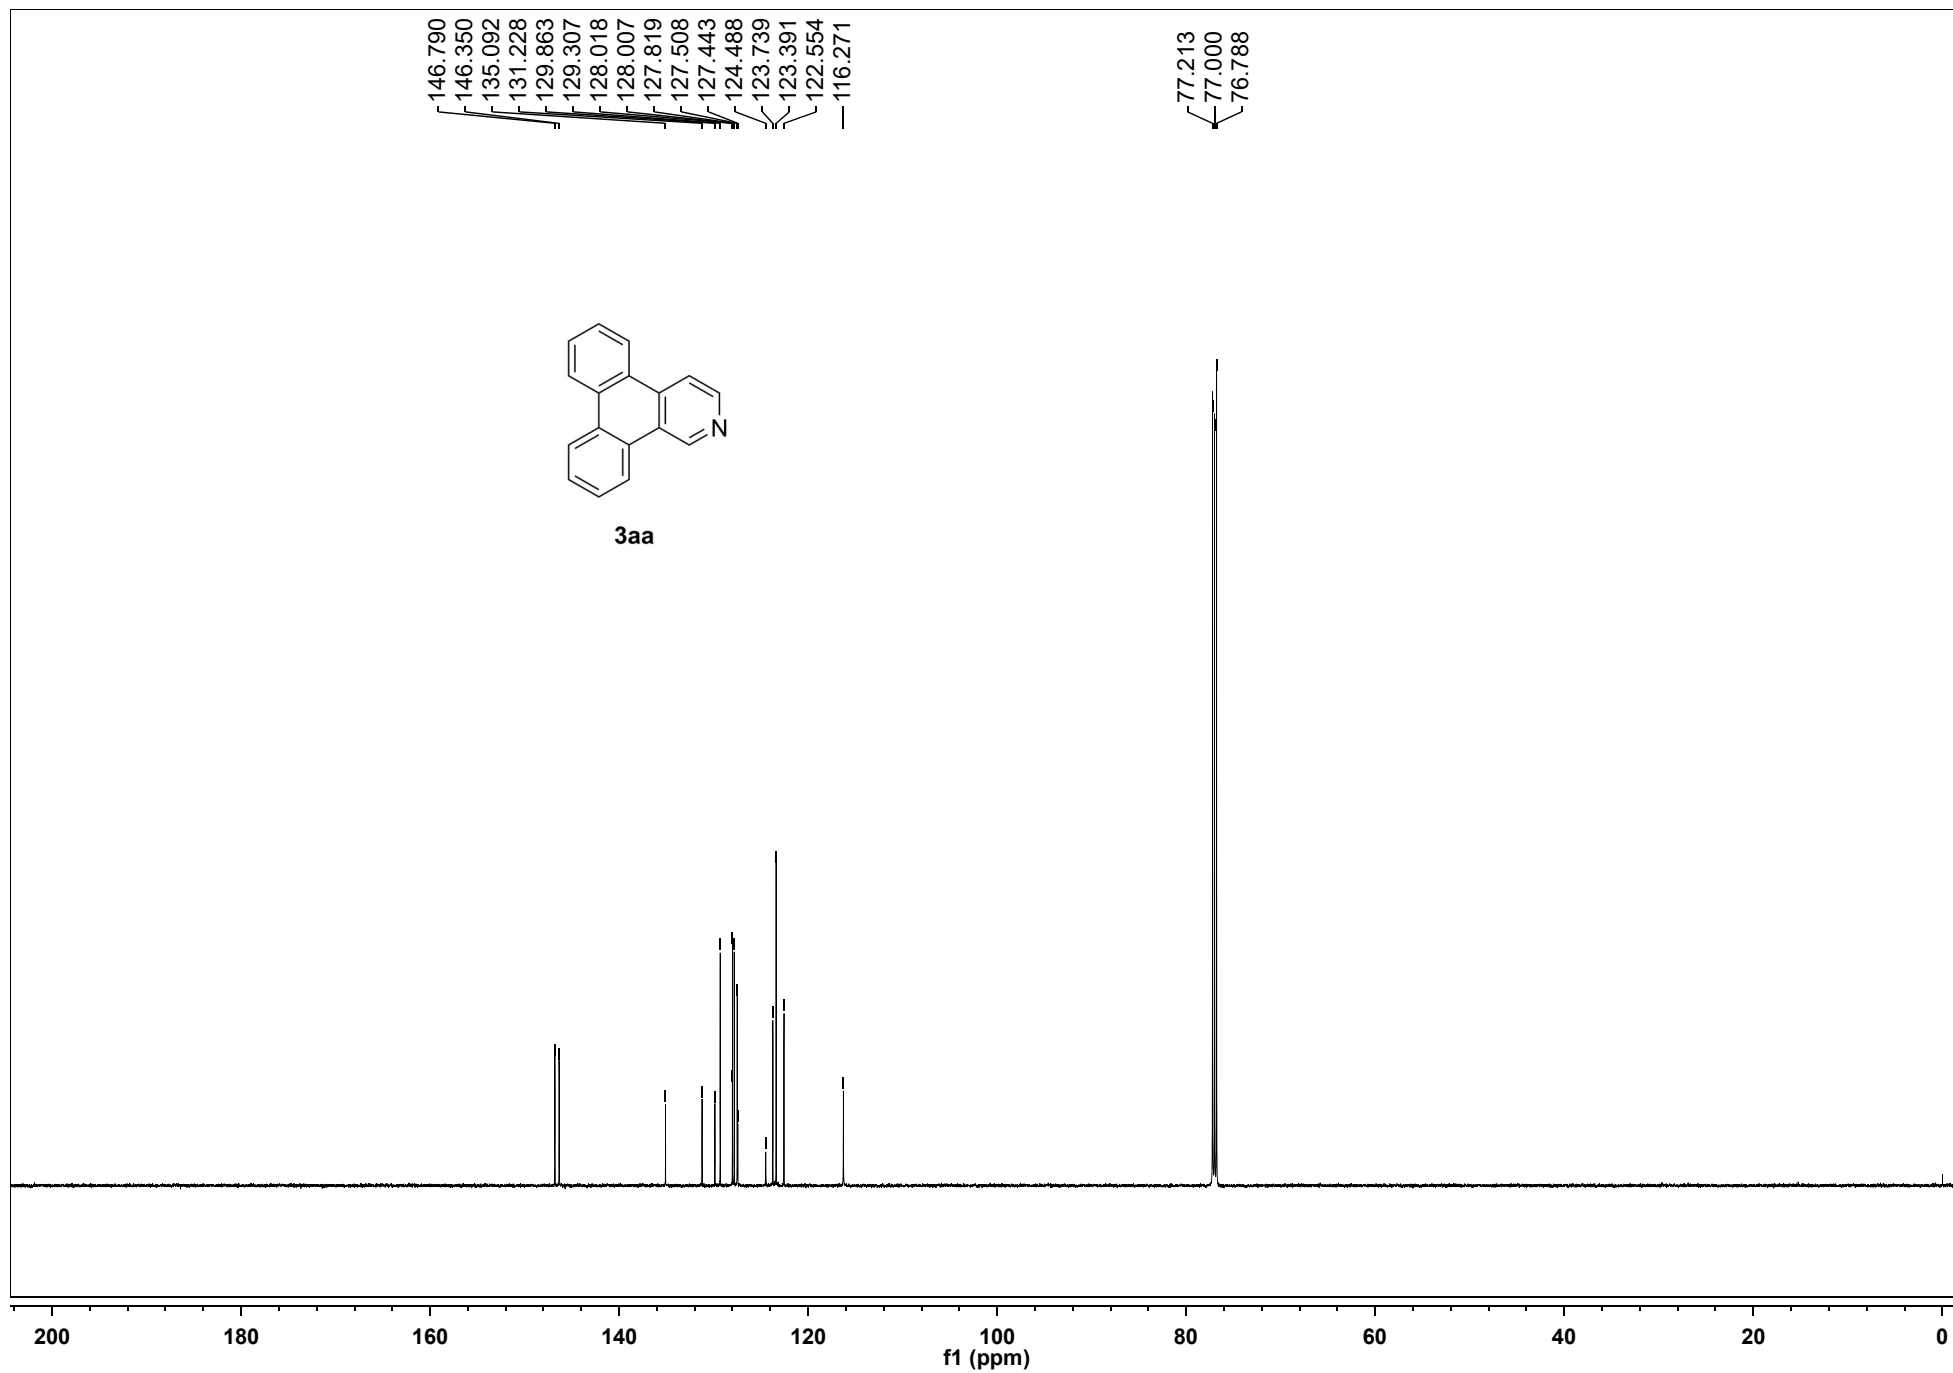

Figure S9. <sup>1</sup>H NMR spectrum (600 MHz, CDCl<sub>3</sub>) of 3ba

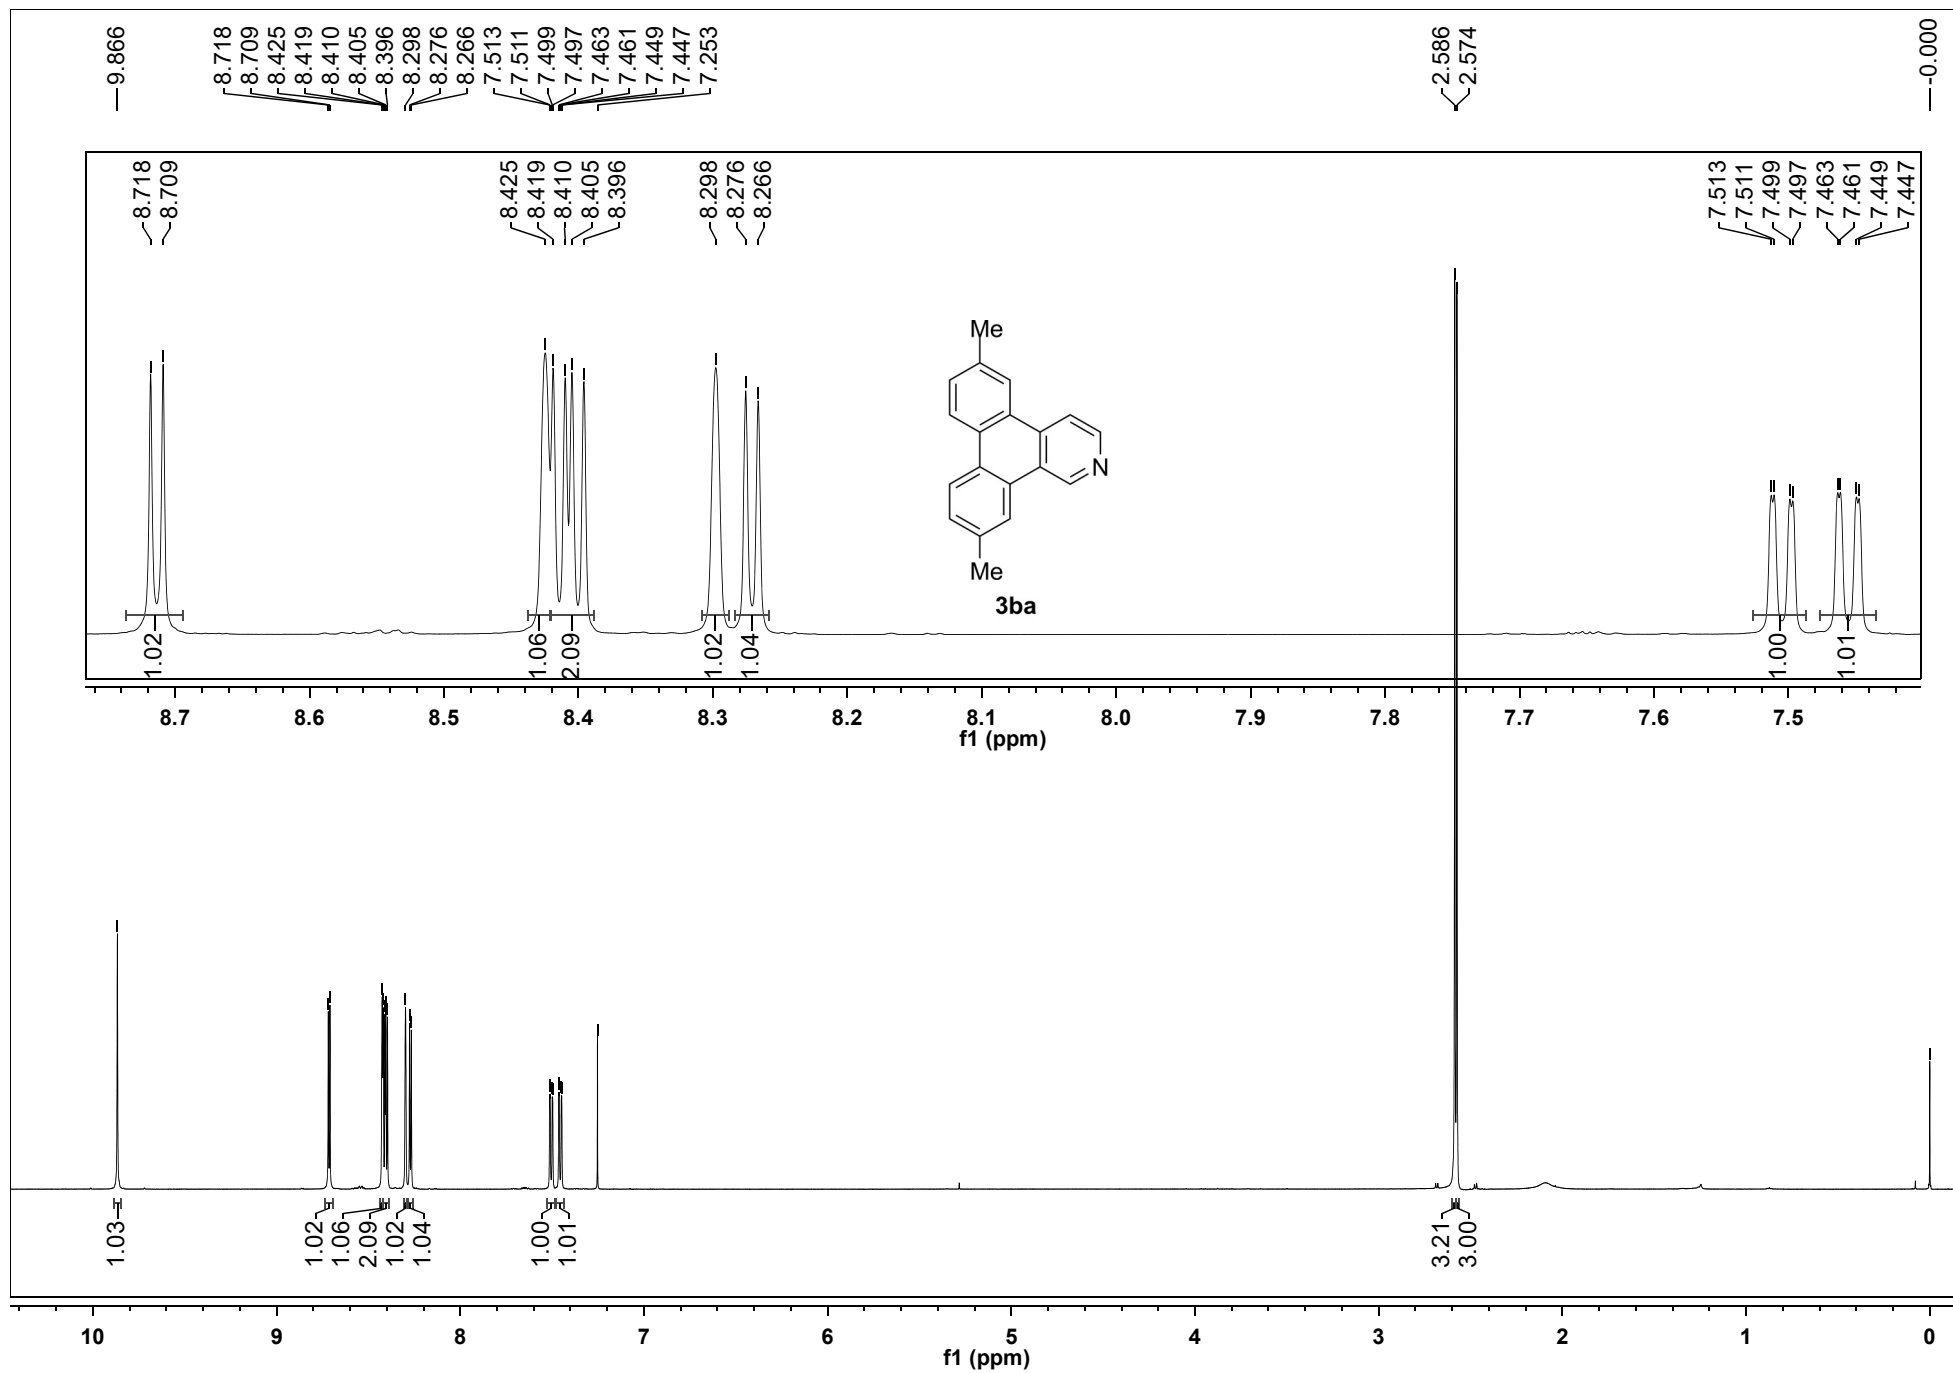

Figure S10.  $^{13}\text{C}\{^1\text{H}\}$  NMR spectrum (150 MHz,  $\text{CDCl}_3$ ) of 3ba

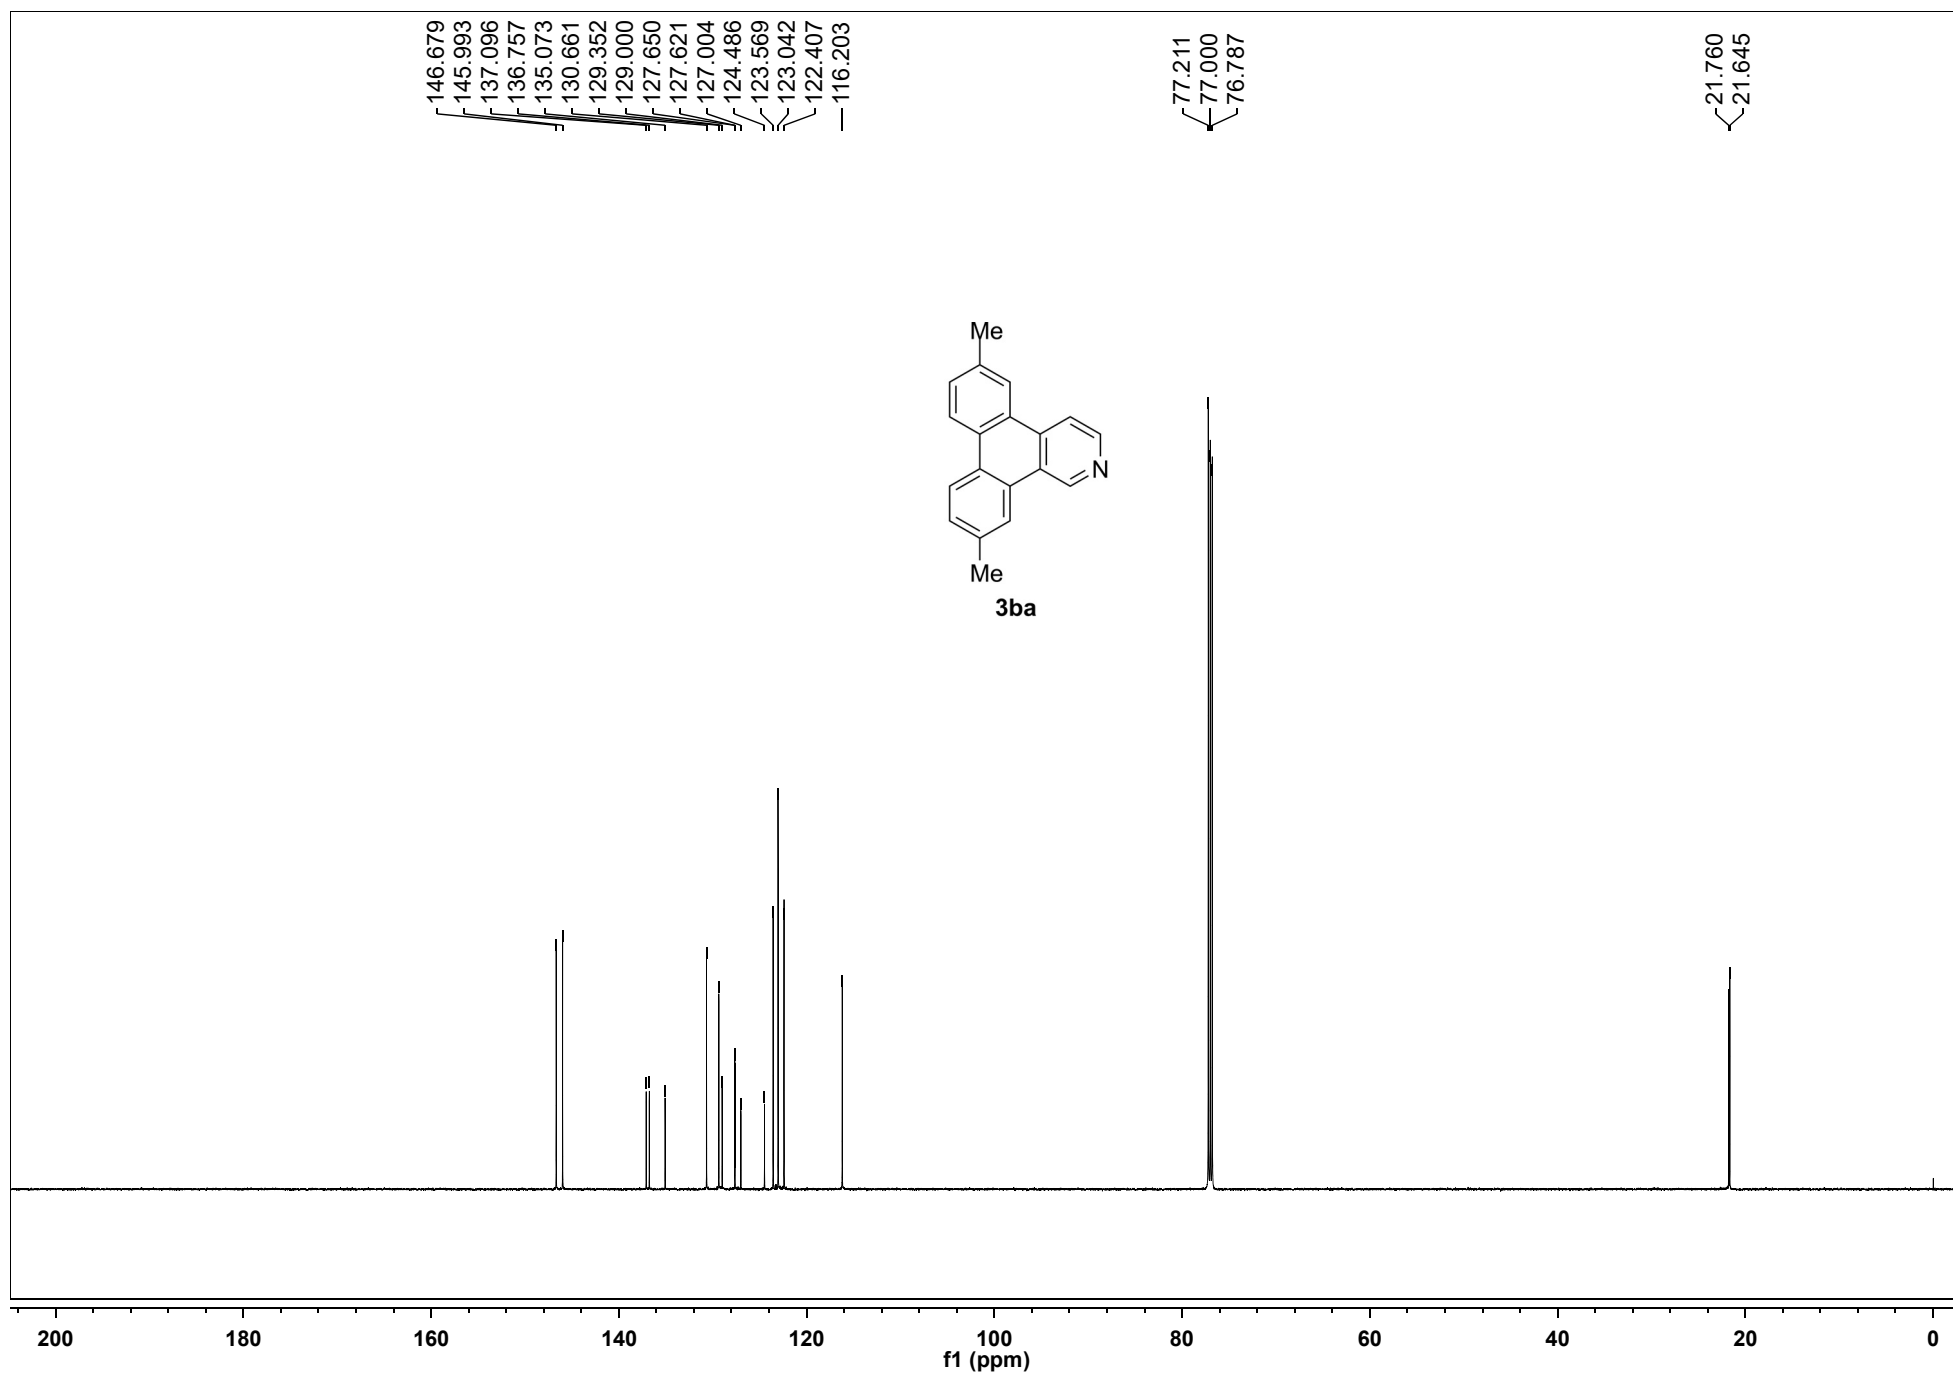

Figure S11. <sup>1</sup>H NMR spectrum (600 MHz, CDCl<sub>3</sub>) of 3ca

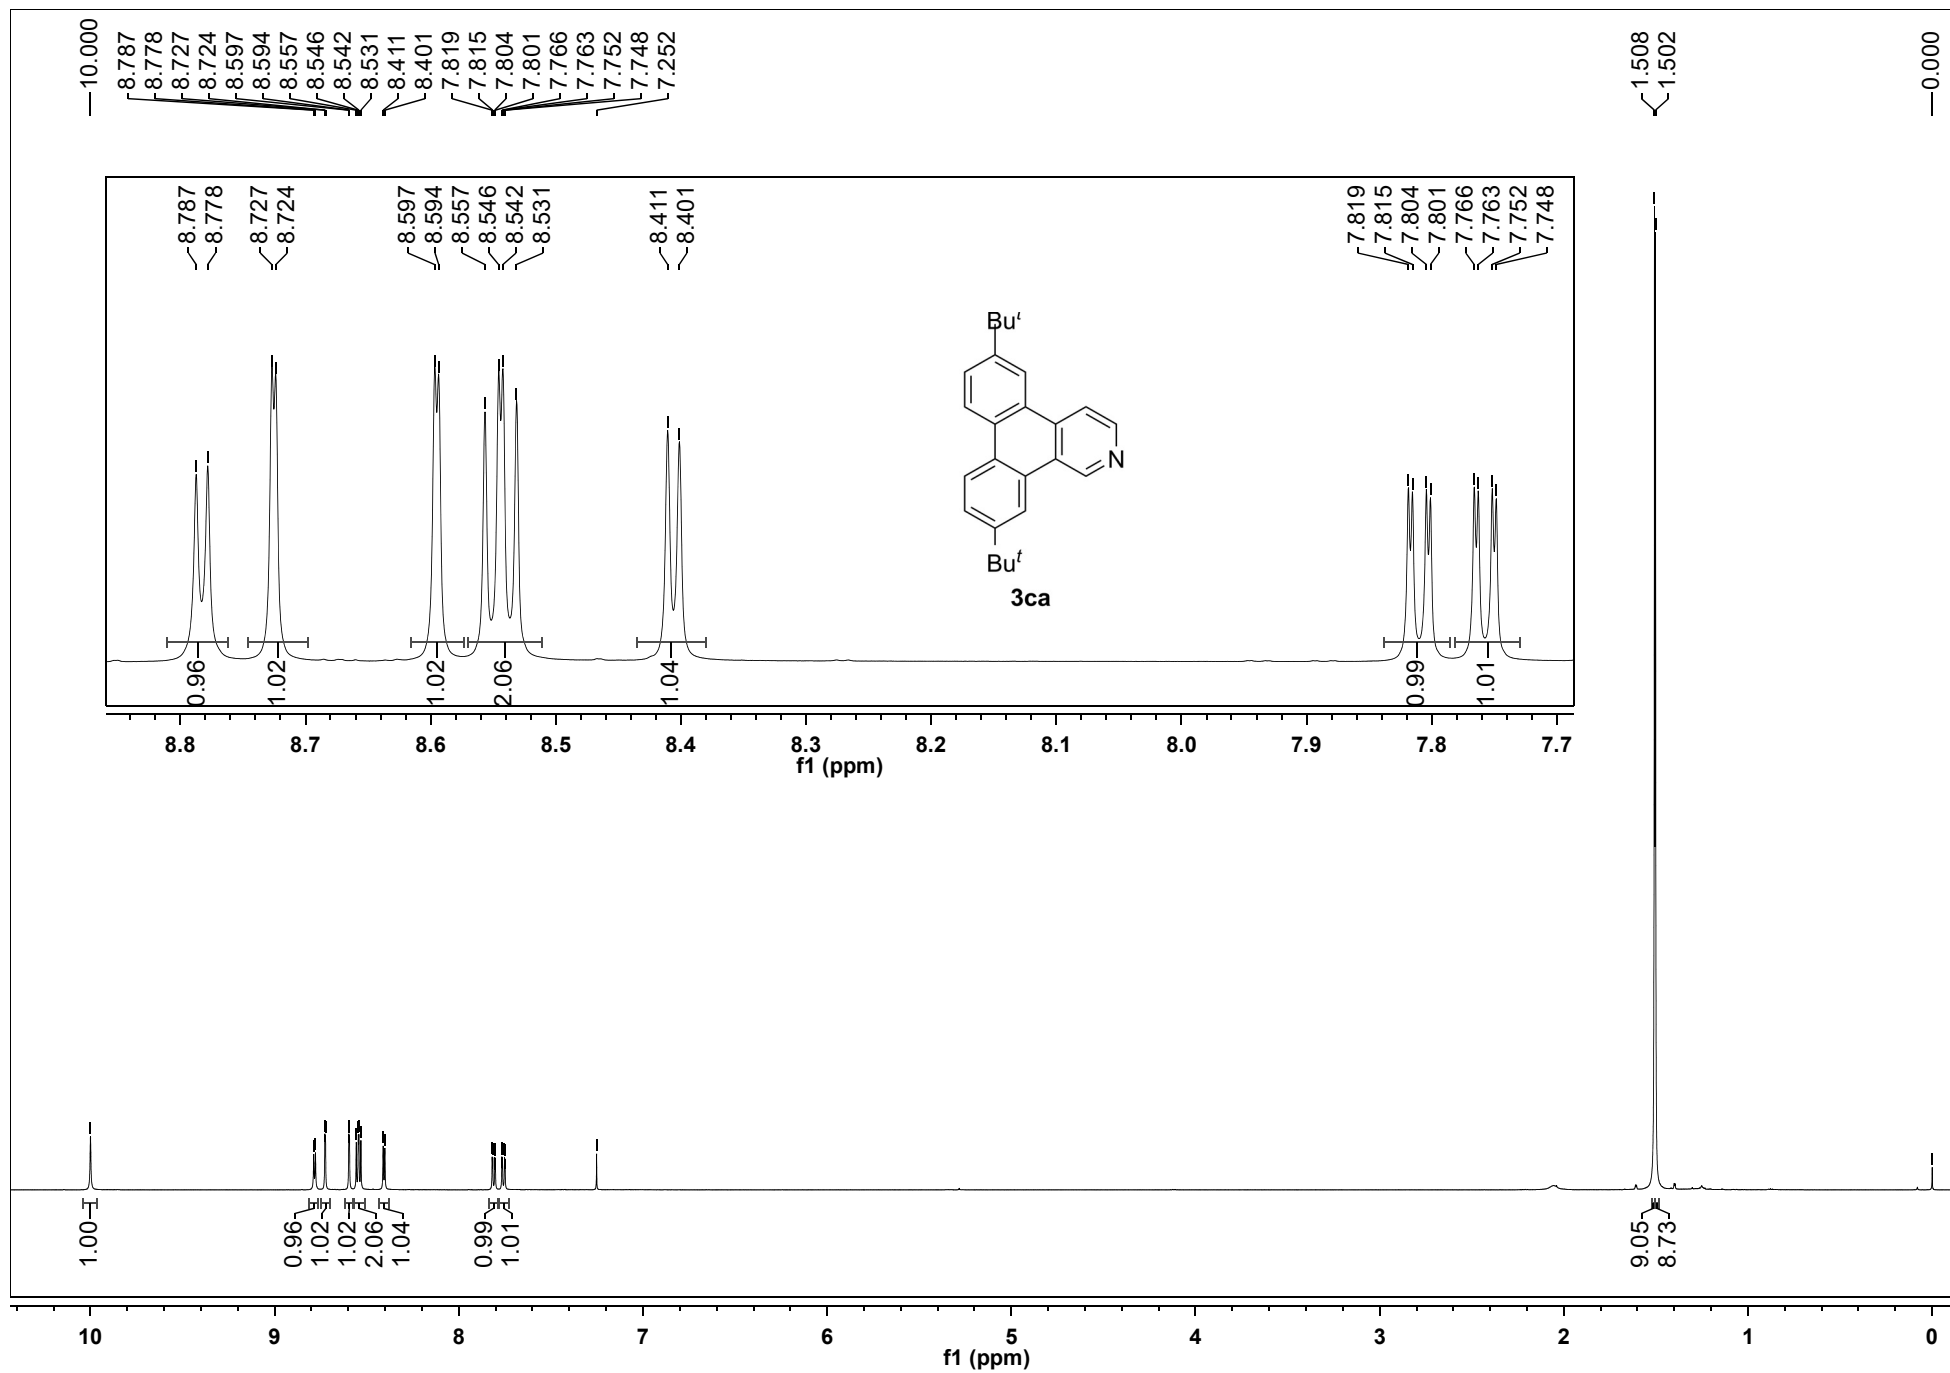

Figure S12.  $^{13}\text{C}\{^1\text{H}\}$  NMR spectrum (150 MHz,  $\text{CDCl}_3$ ) of 3ca

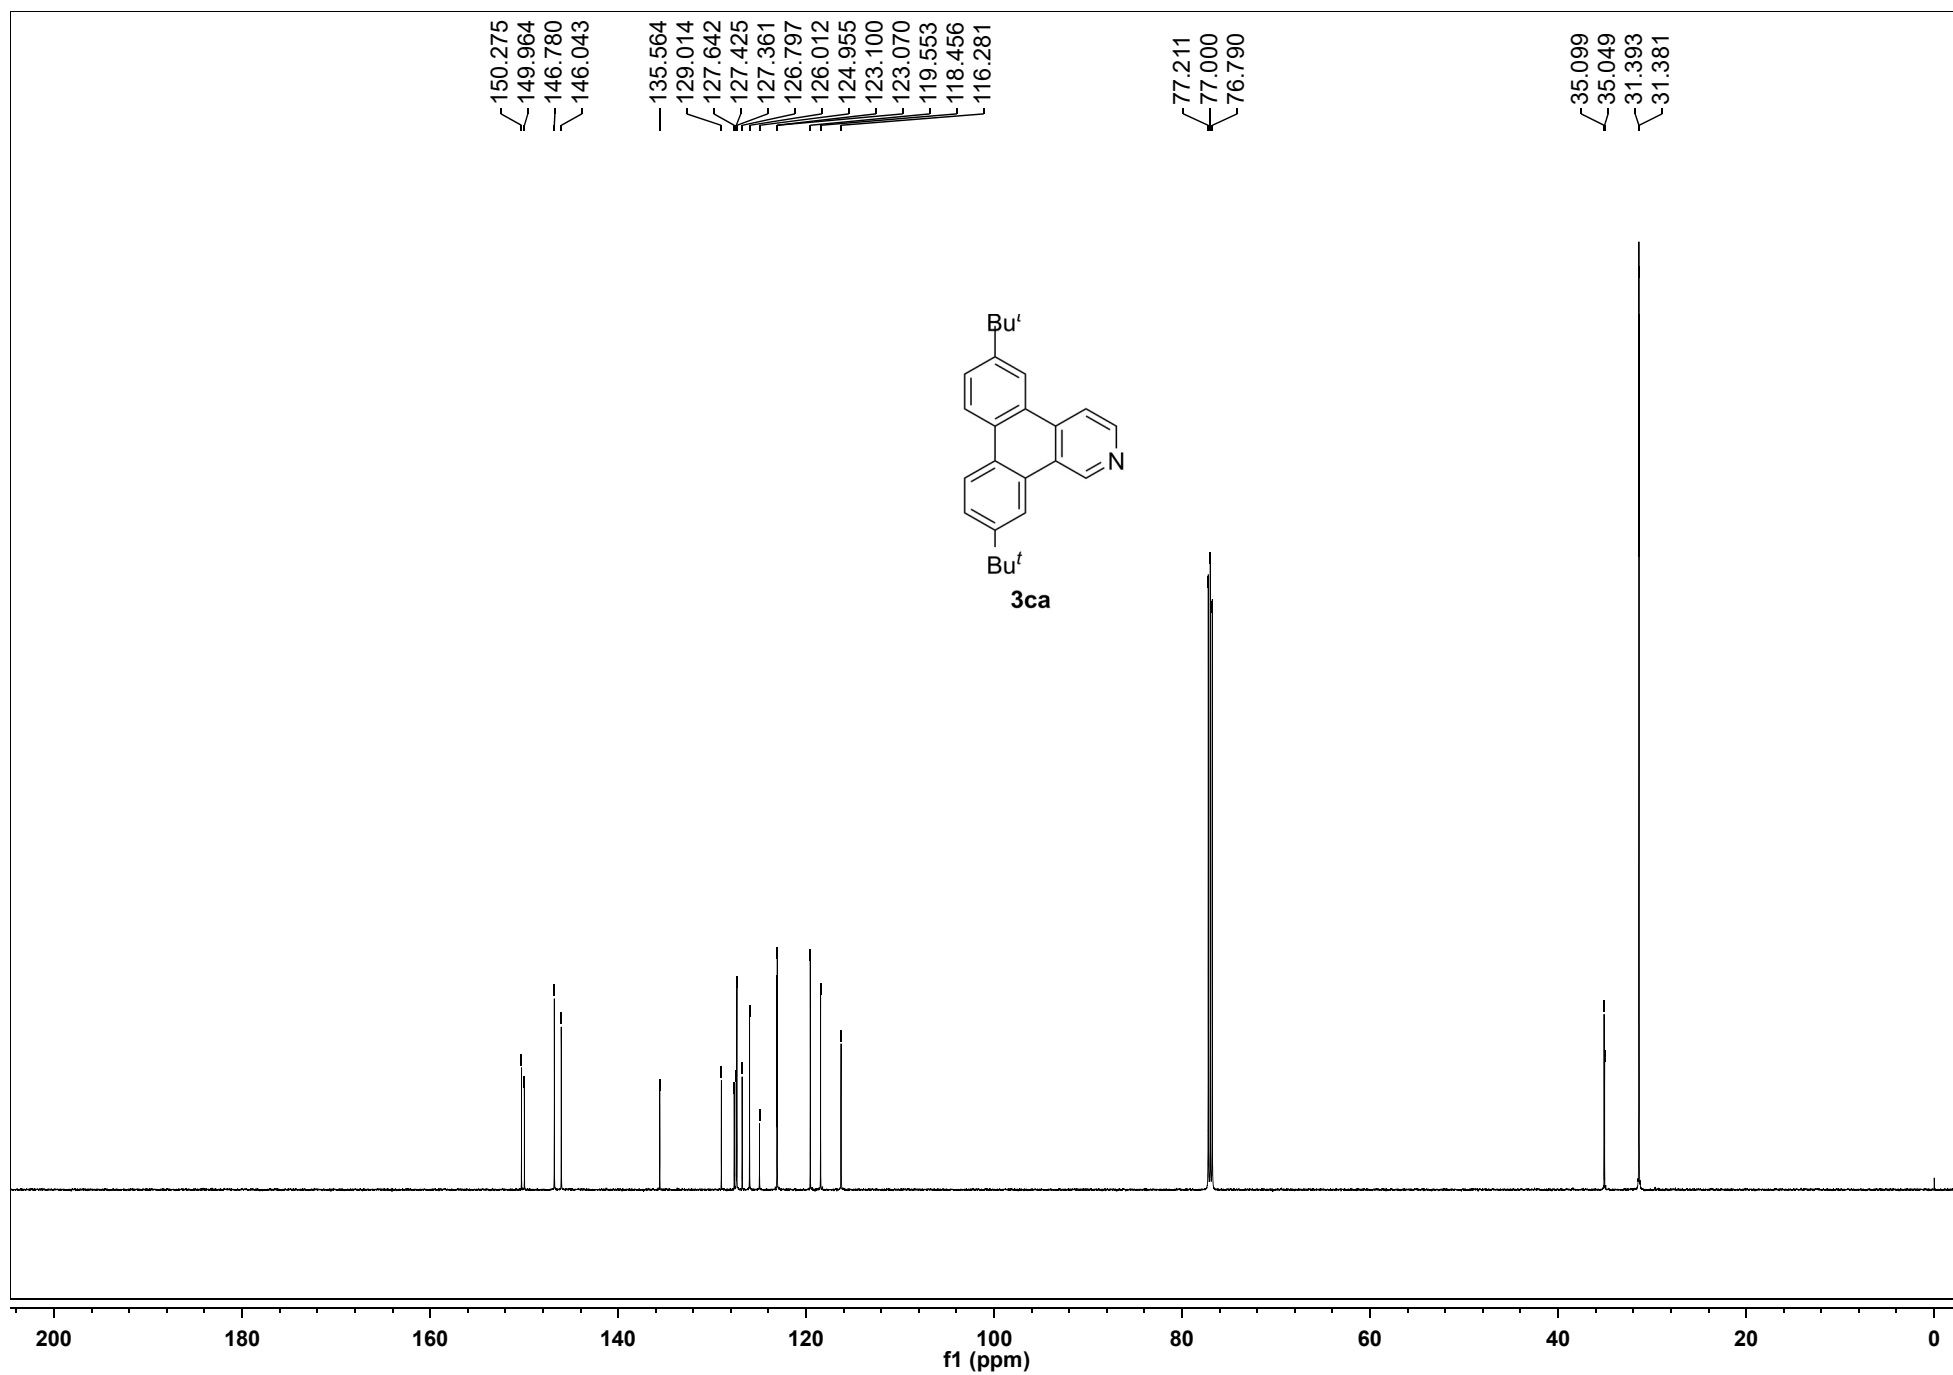

Figure S13. <sup>1</sup>H NMR spectrum (600 MHz, CDCl<sub>3</sub>) of 3da

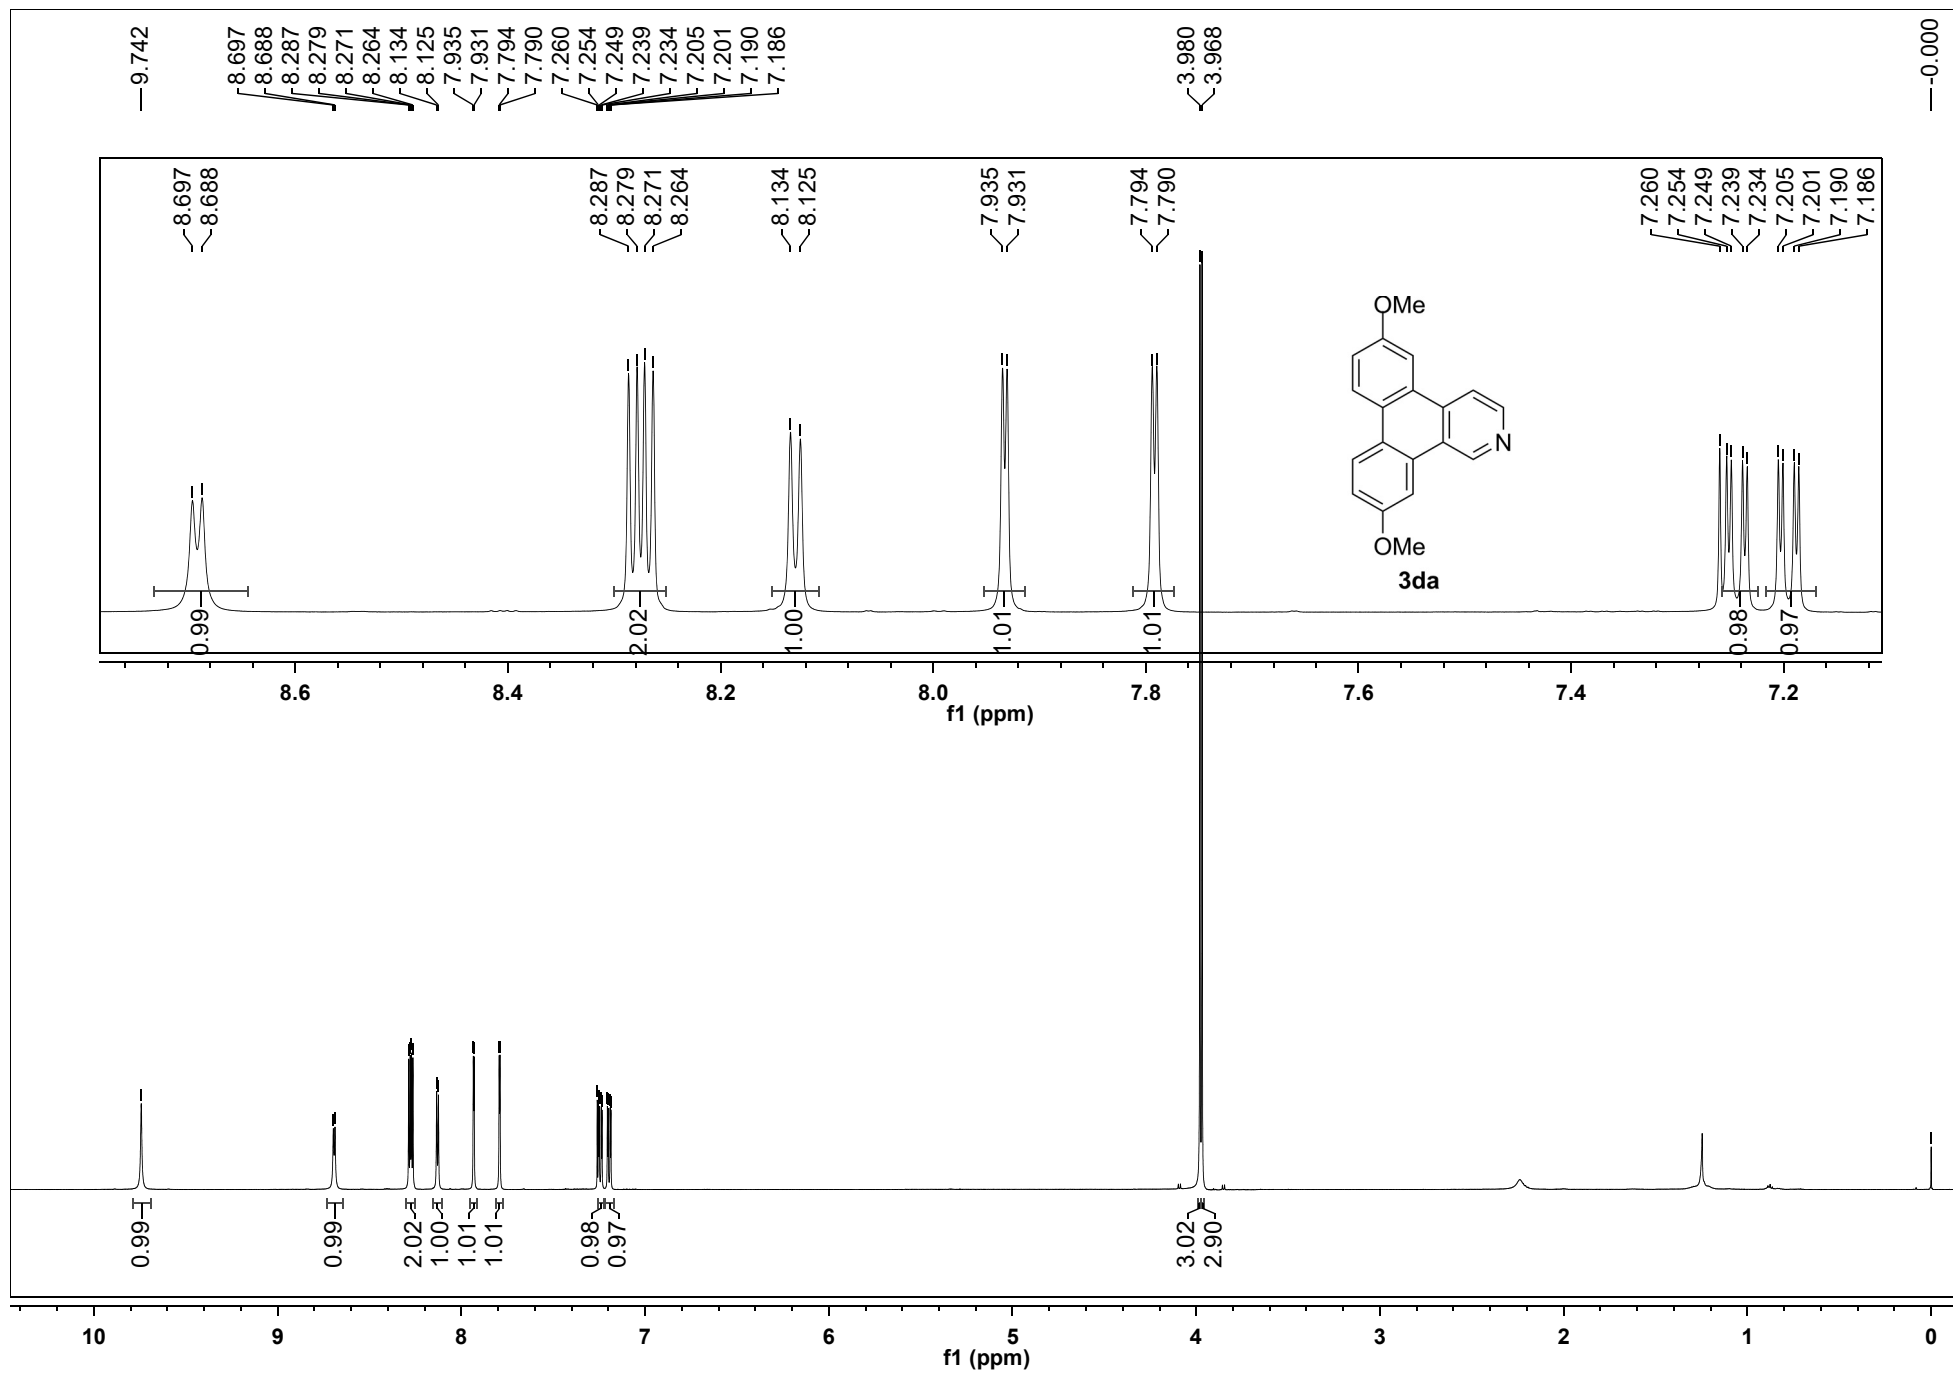

Figure S14.  $^{13}\text{C}\{^1\text{H}\}$  NMR spectrum (150 MHz,  $\text{CDCl}_3$ ) of 3da

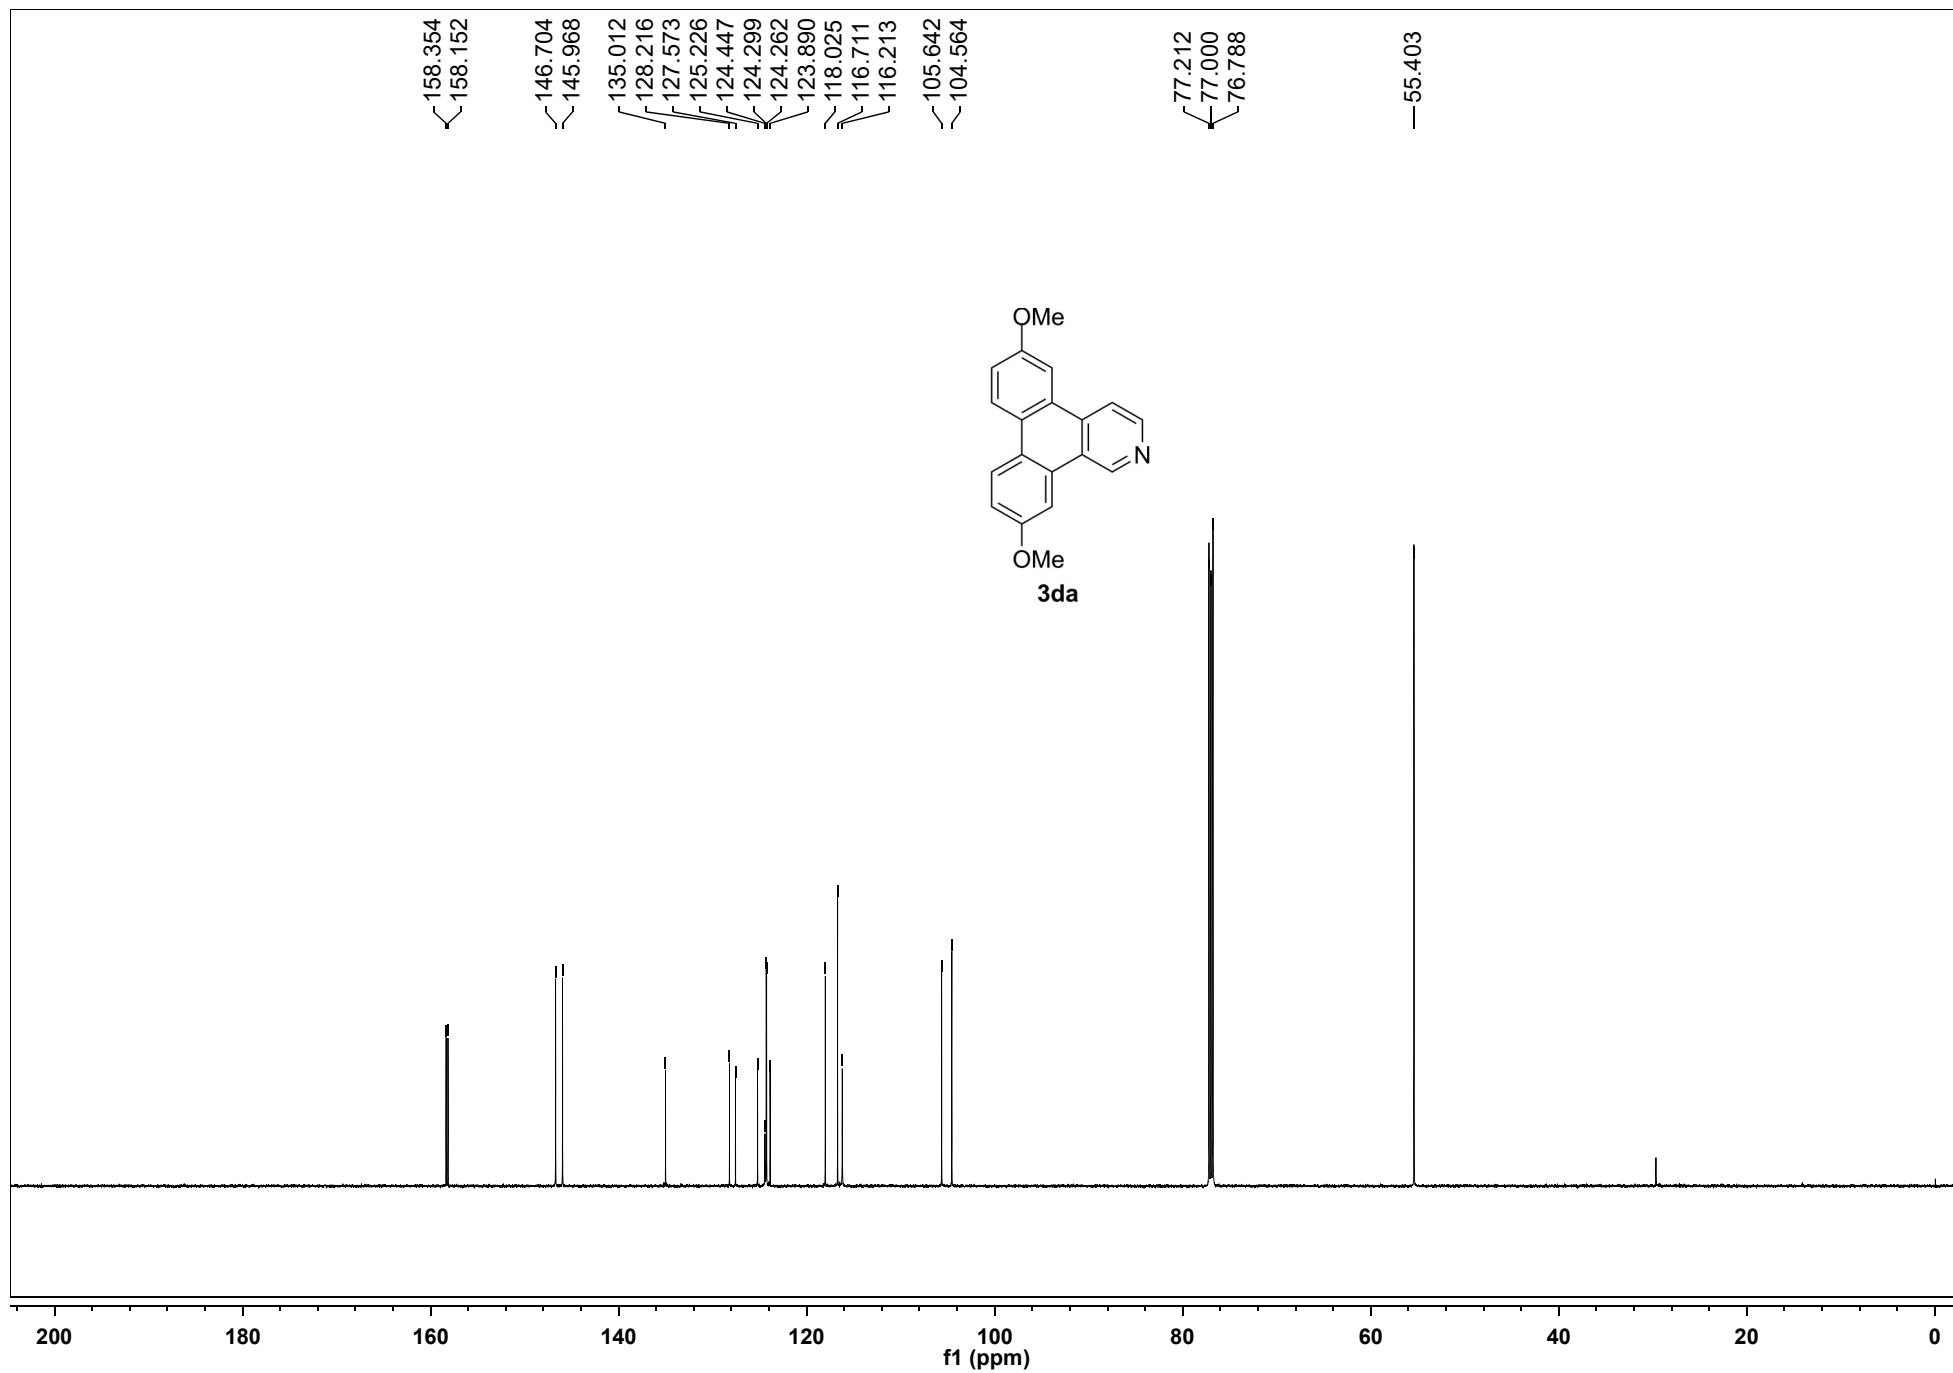

Figure S15. <sup>1</sup>H NMR spectrum (600 MHz, CDCl<sub>3</sub>) of 3ea

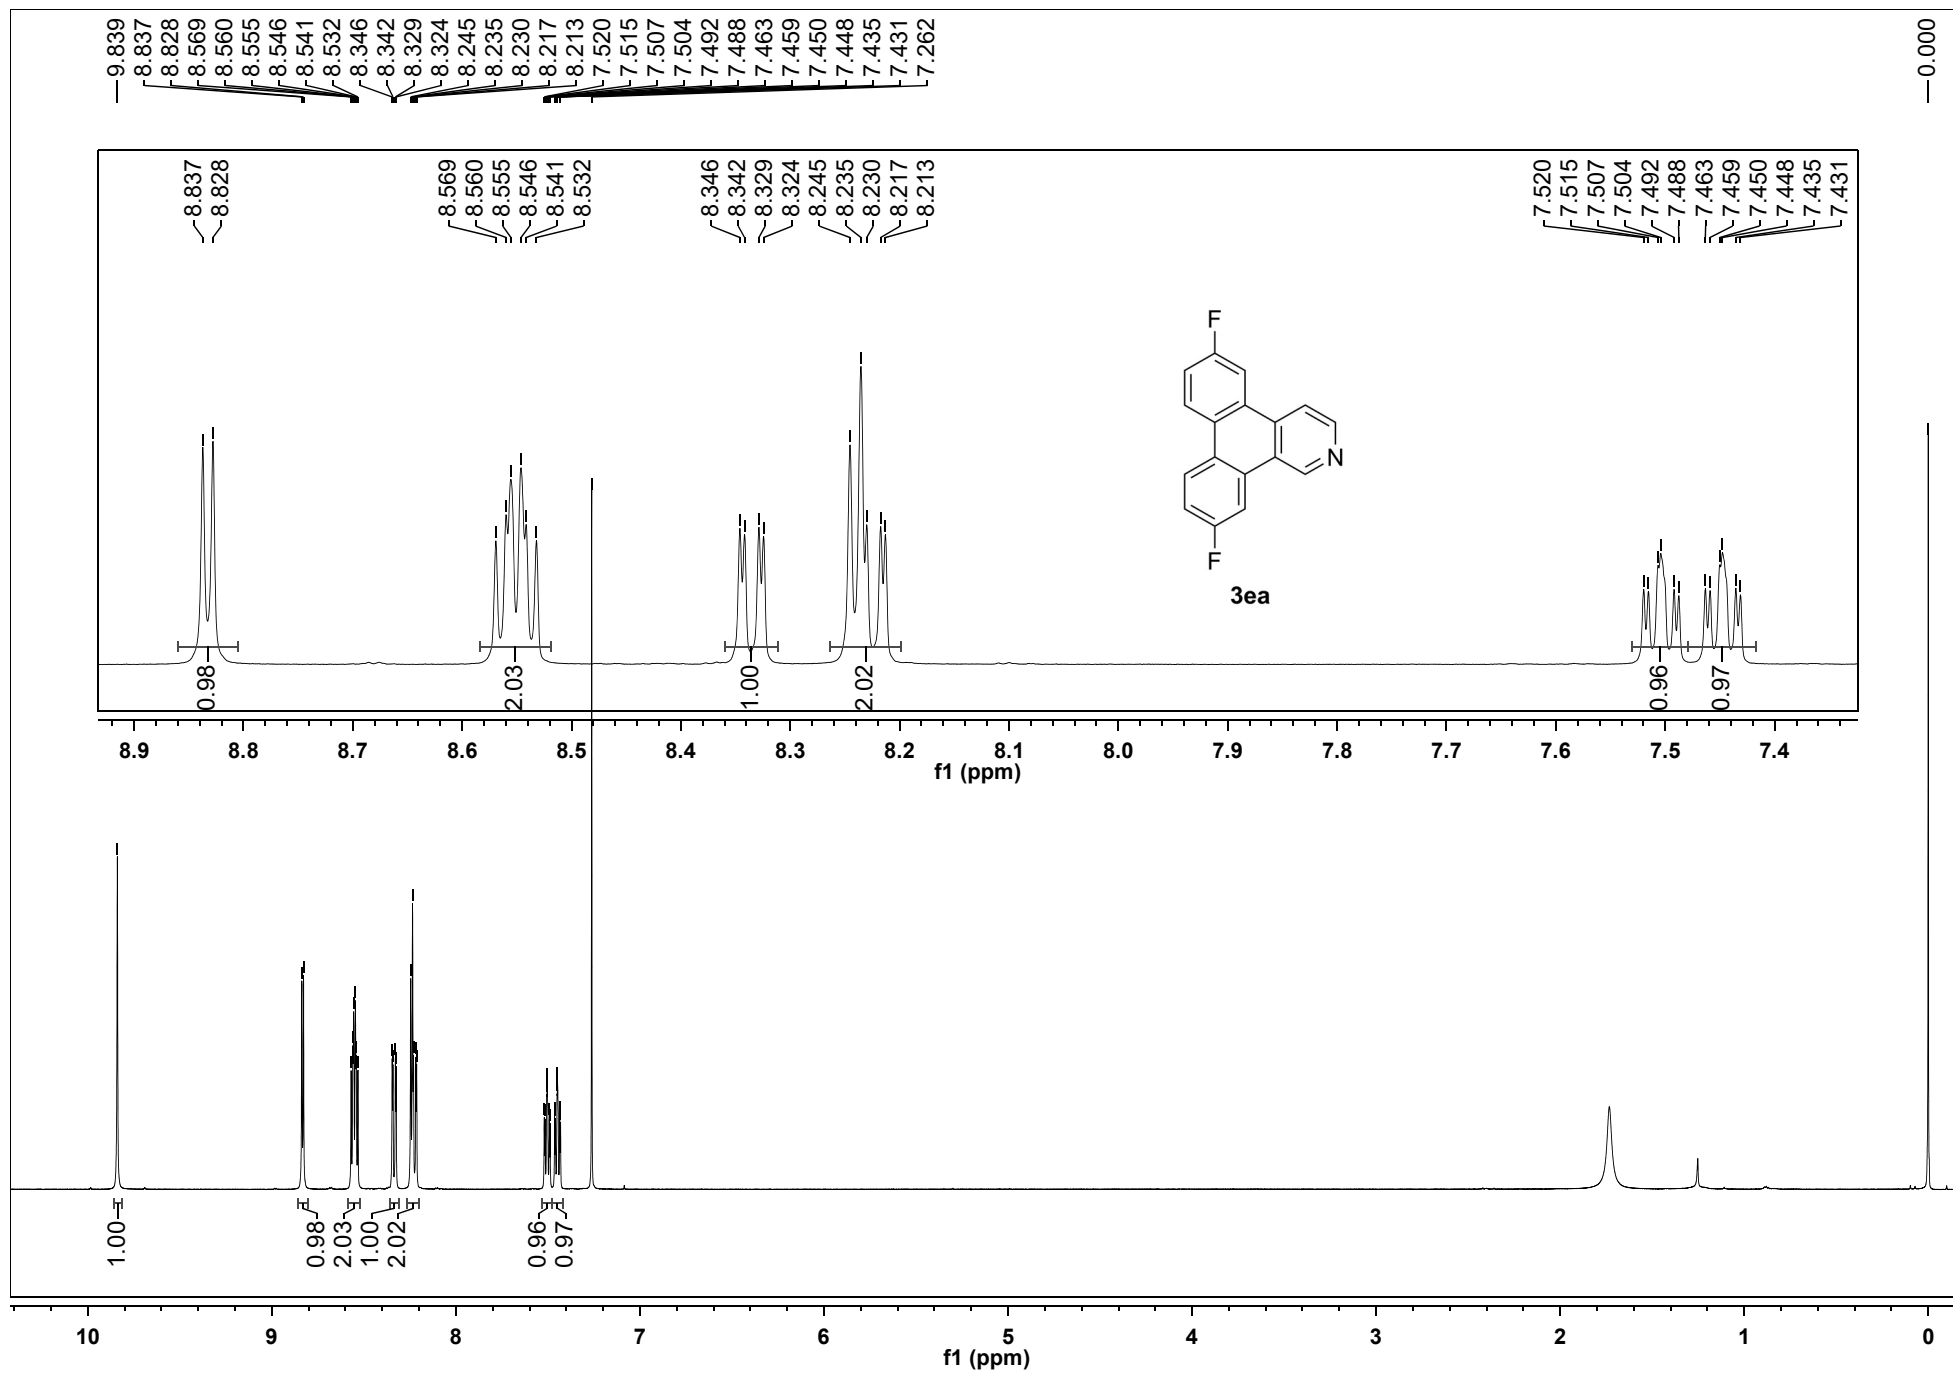



Figure S16.  $^{13}\text{C}\{^1\text{H}\}$  NMR spectrum (150 MHz,  $\text{CDCl}_3$ ) of 3ea

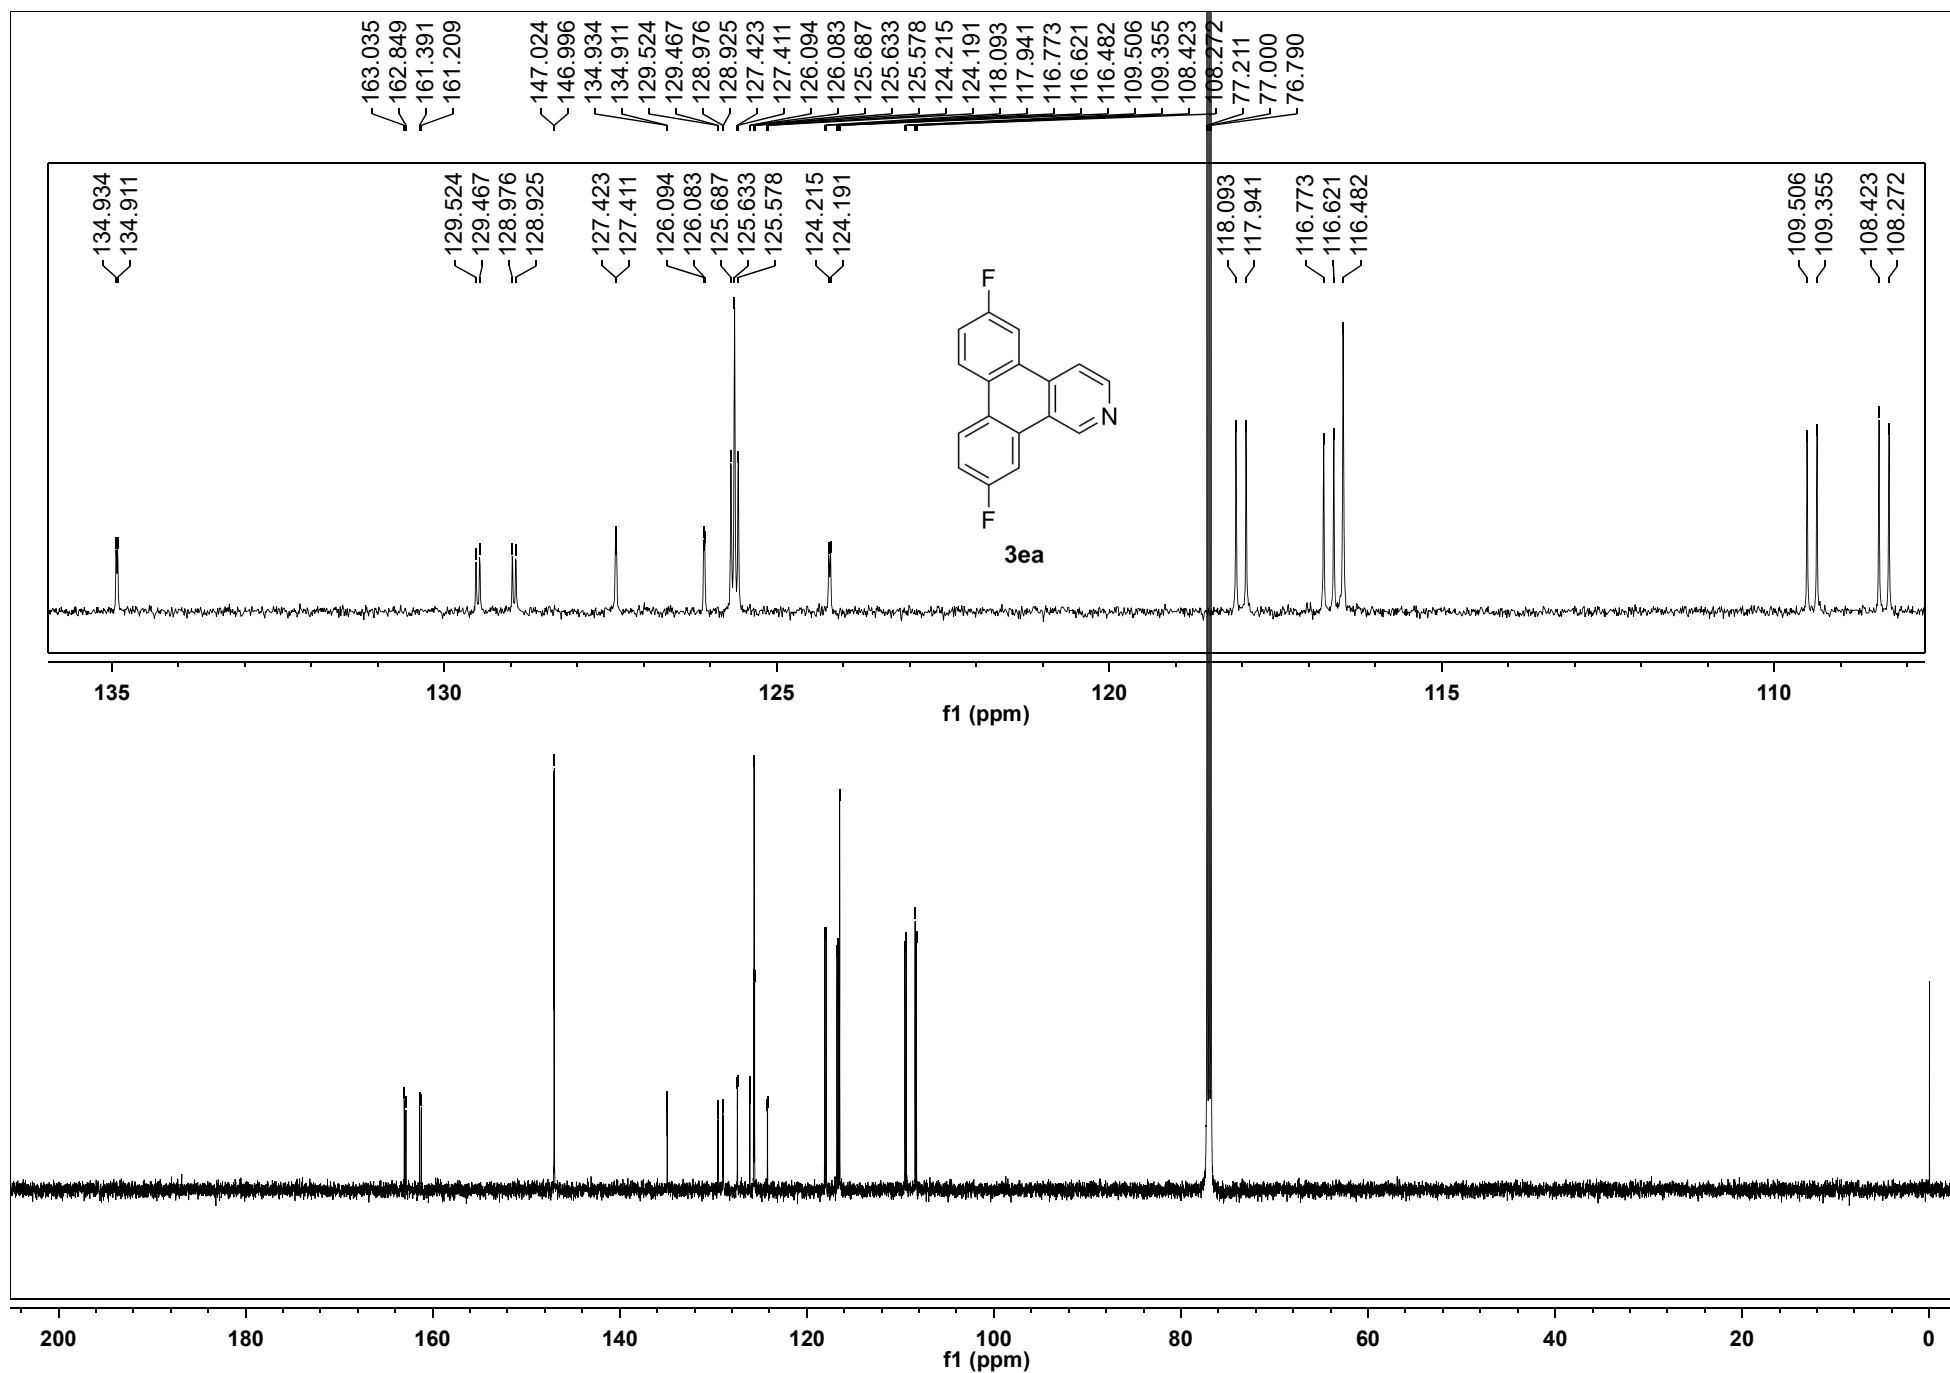

Figure S17. <sup>1</sup>H NMR spectrum (600 MHz, CDCl<sub>3</sub>) of 3fa

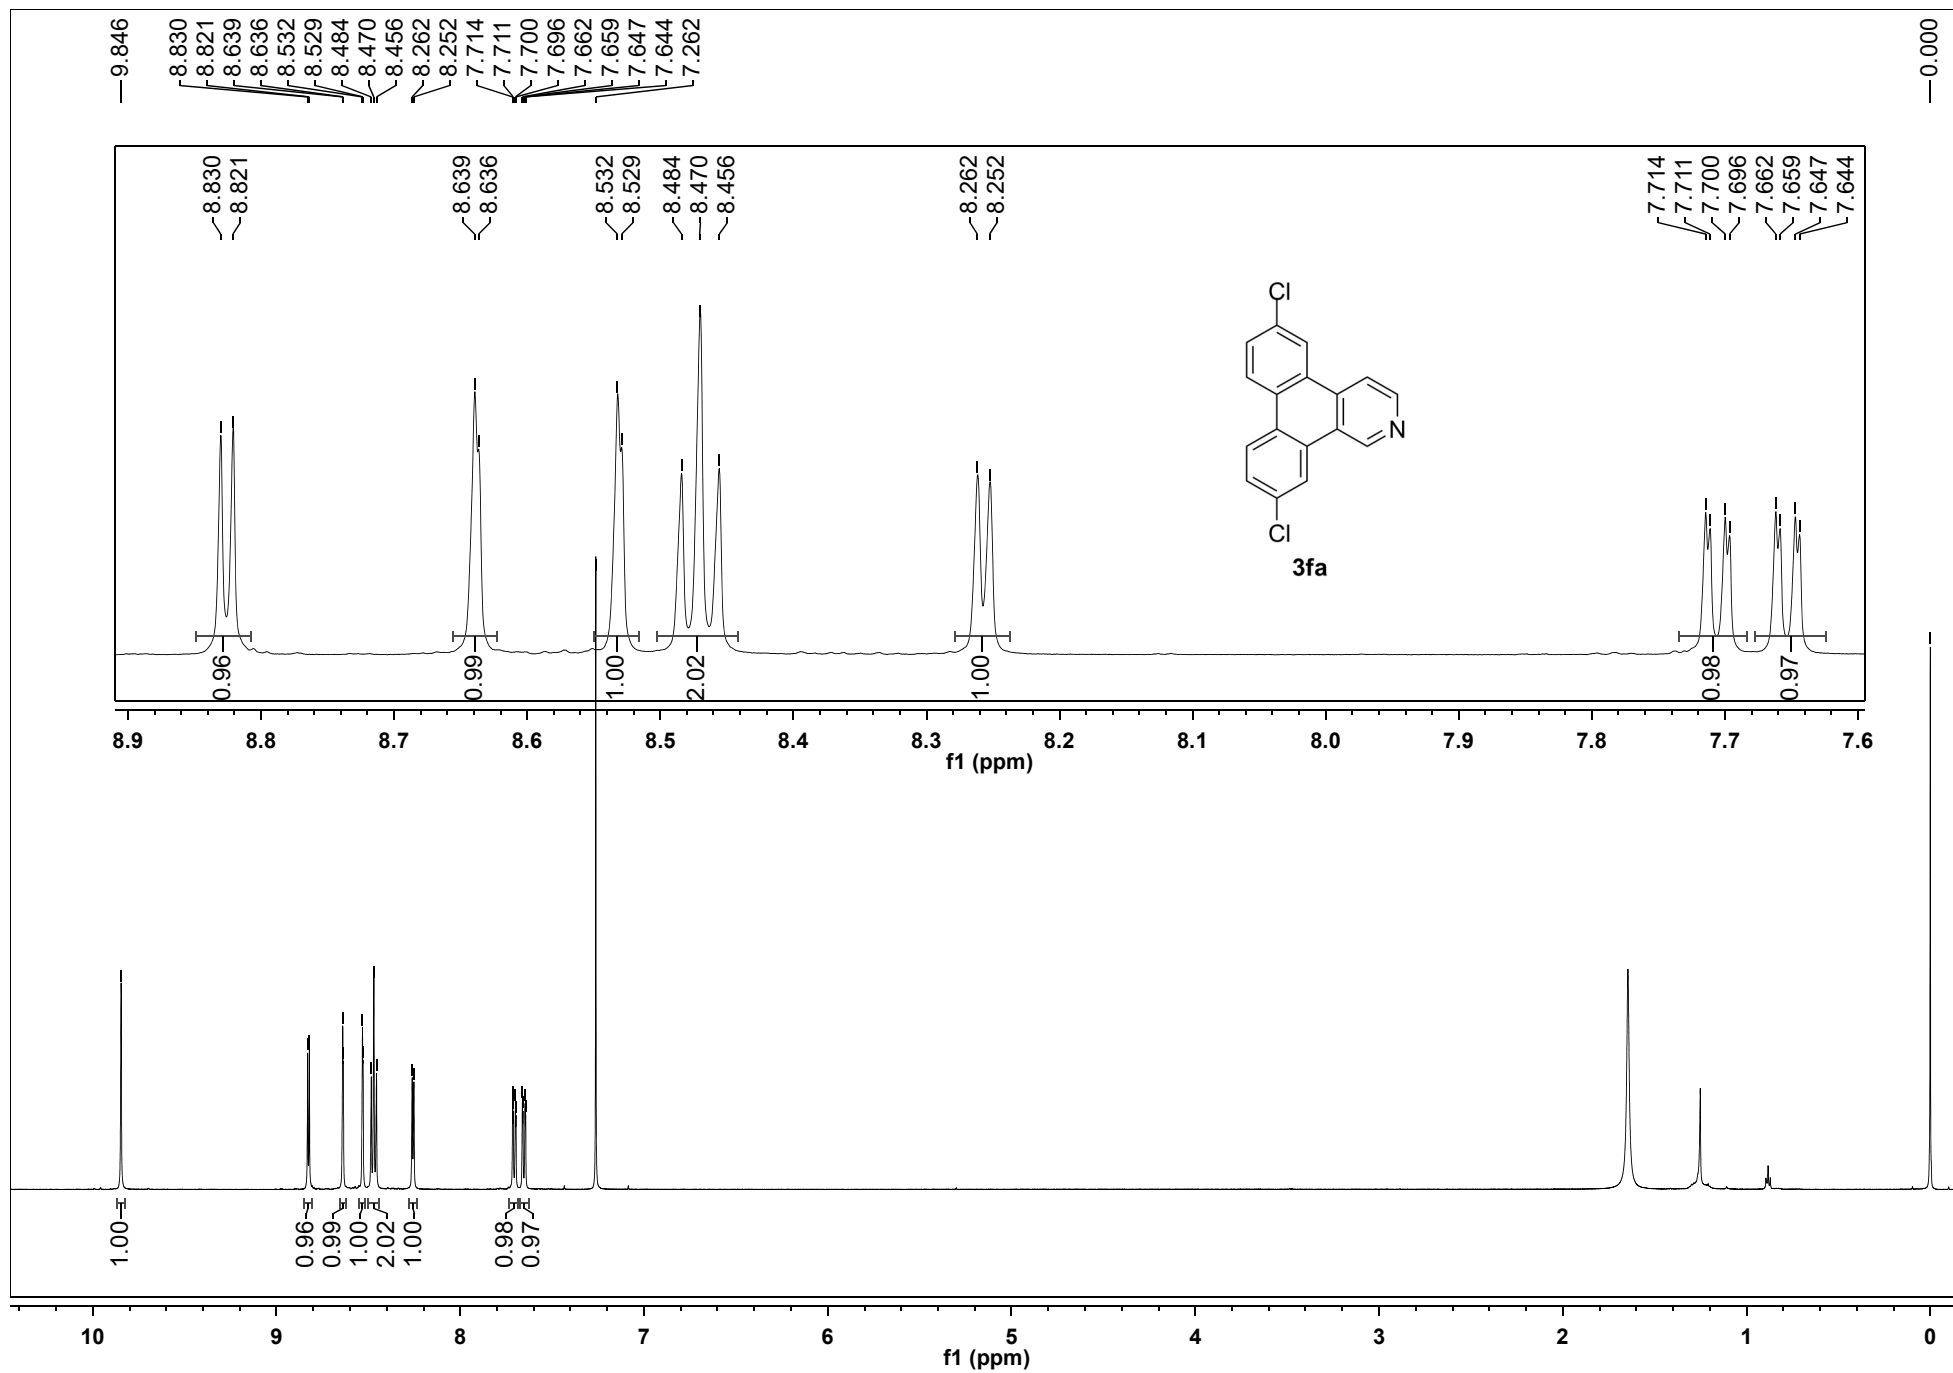

Figure S18.  $^{13}\text{C}\{^1\text{H}\}$  NMR spectrum (150 MHz,  $\text{CDCl}_3$ ) of 3fa

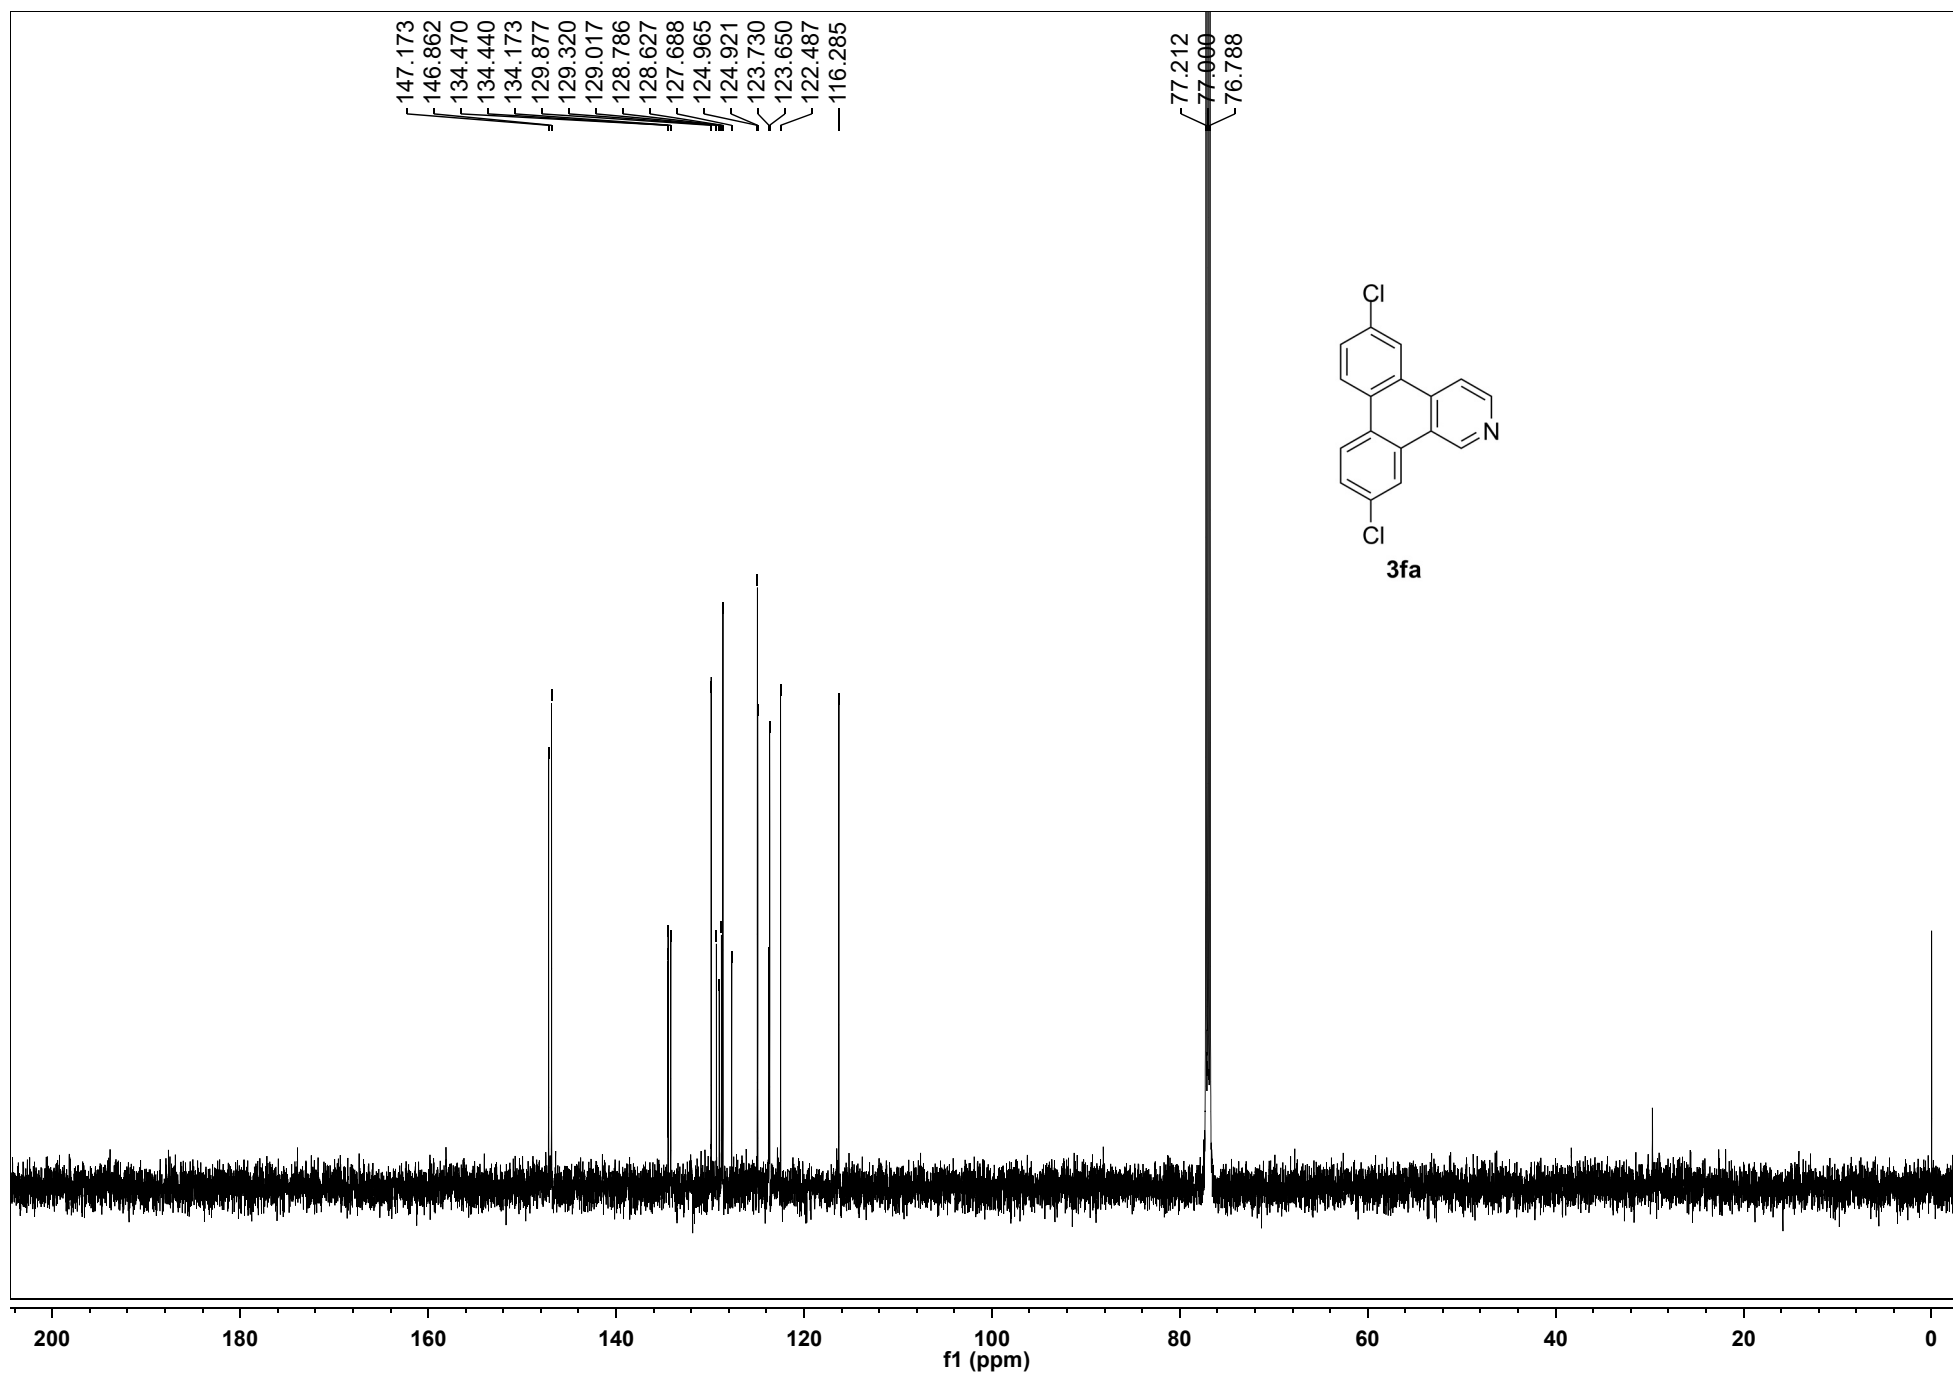

Figure S19. <sup>1</sup>H NMR spectrum (600 MHz, CDCl<sub>3</sub>) of 3ga

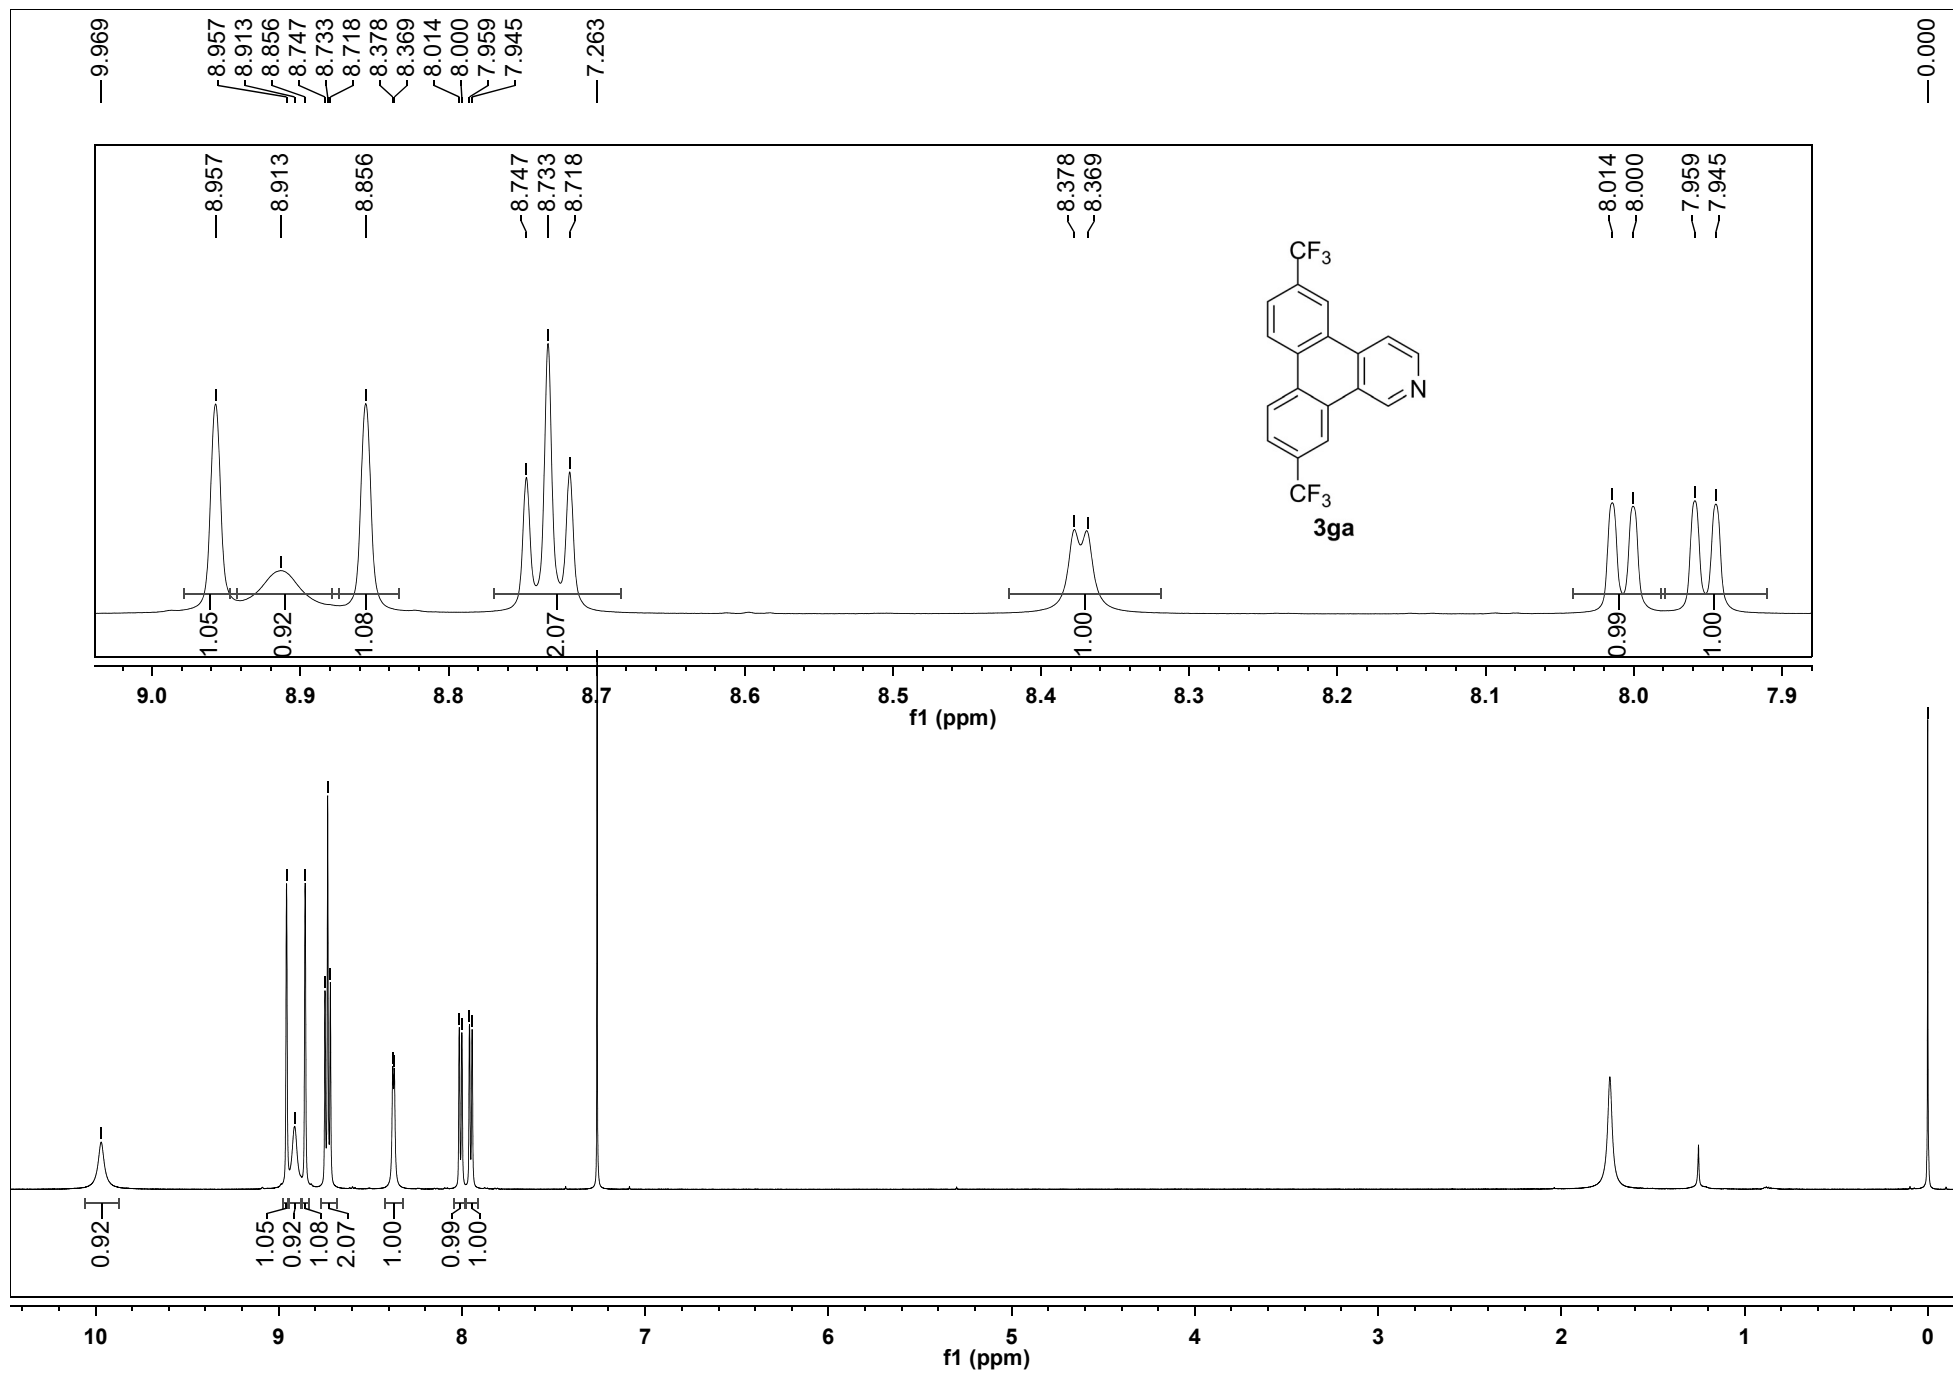

Figure S20.  $^{13}\text{C}\{^1\text{H}\}$  NMR spectrum (150 MHz,  $\text{CDCl}_3$ ) of 3ga

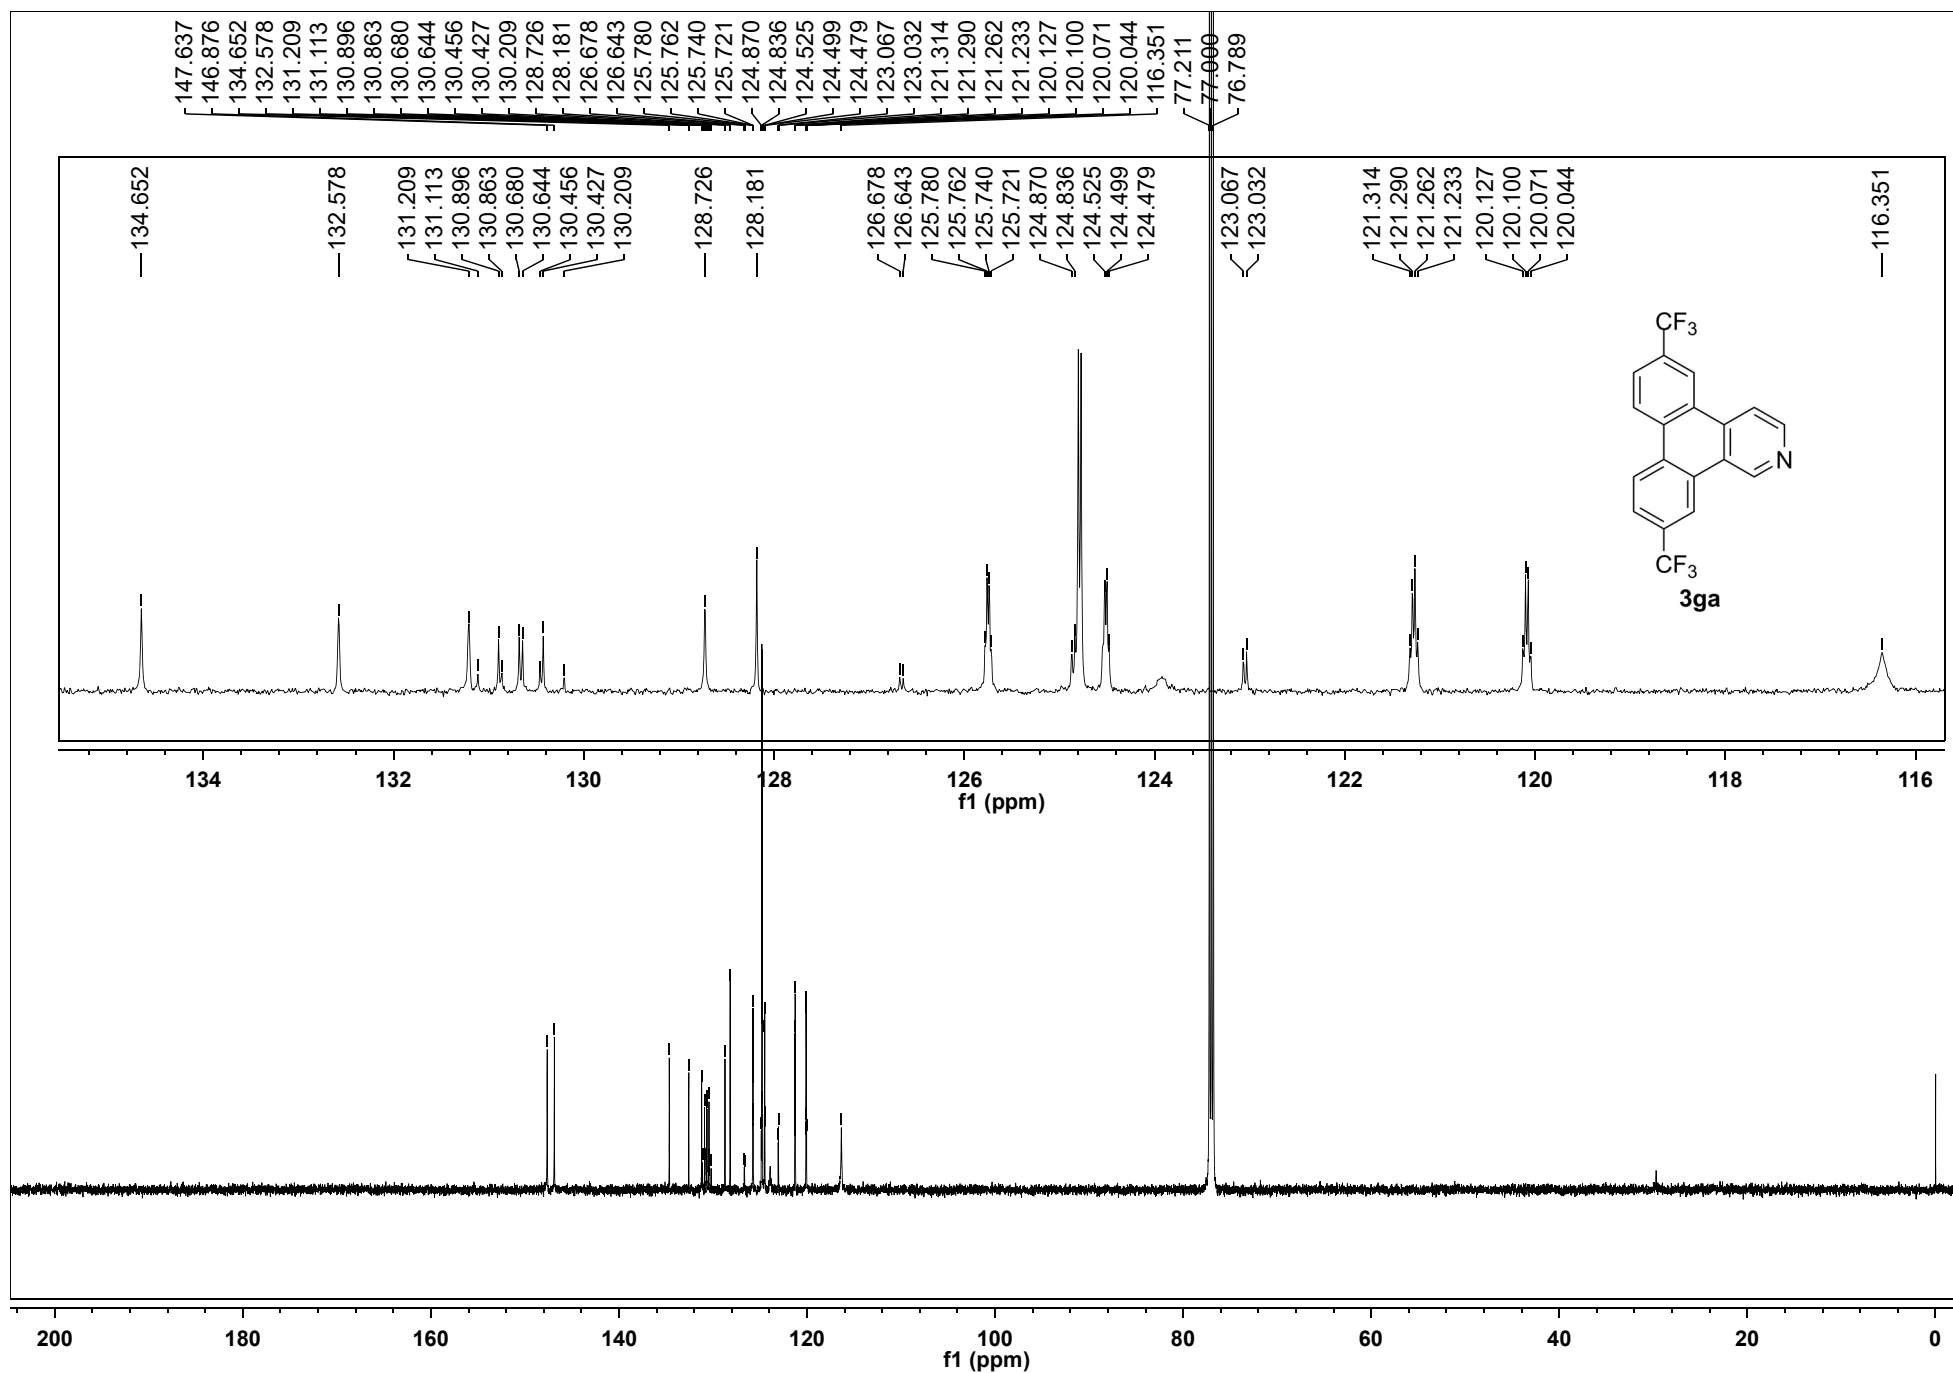

Figure S21. <sup>1</sup>H NMR spectrum (600 MHz, CDCl<sub>3</sub>) of 3ha

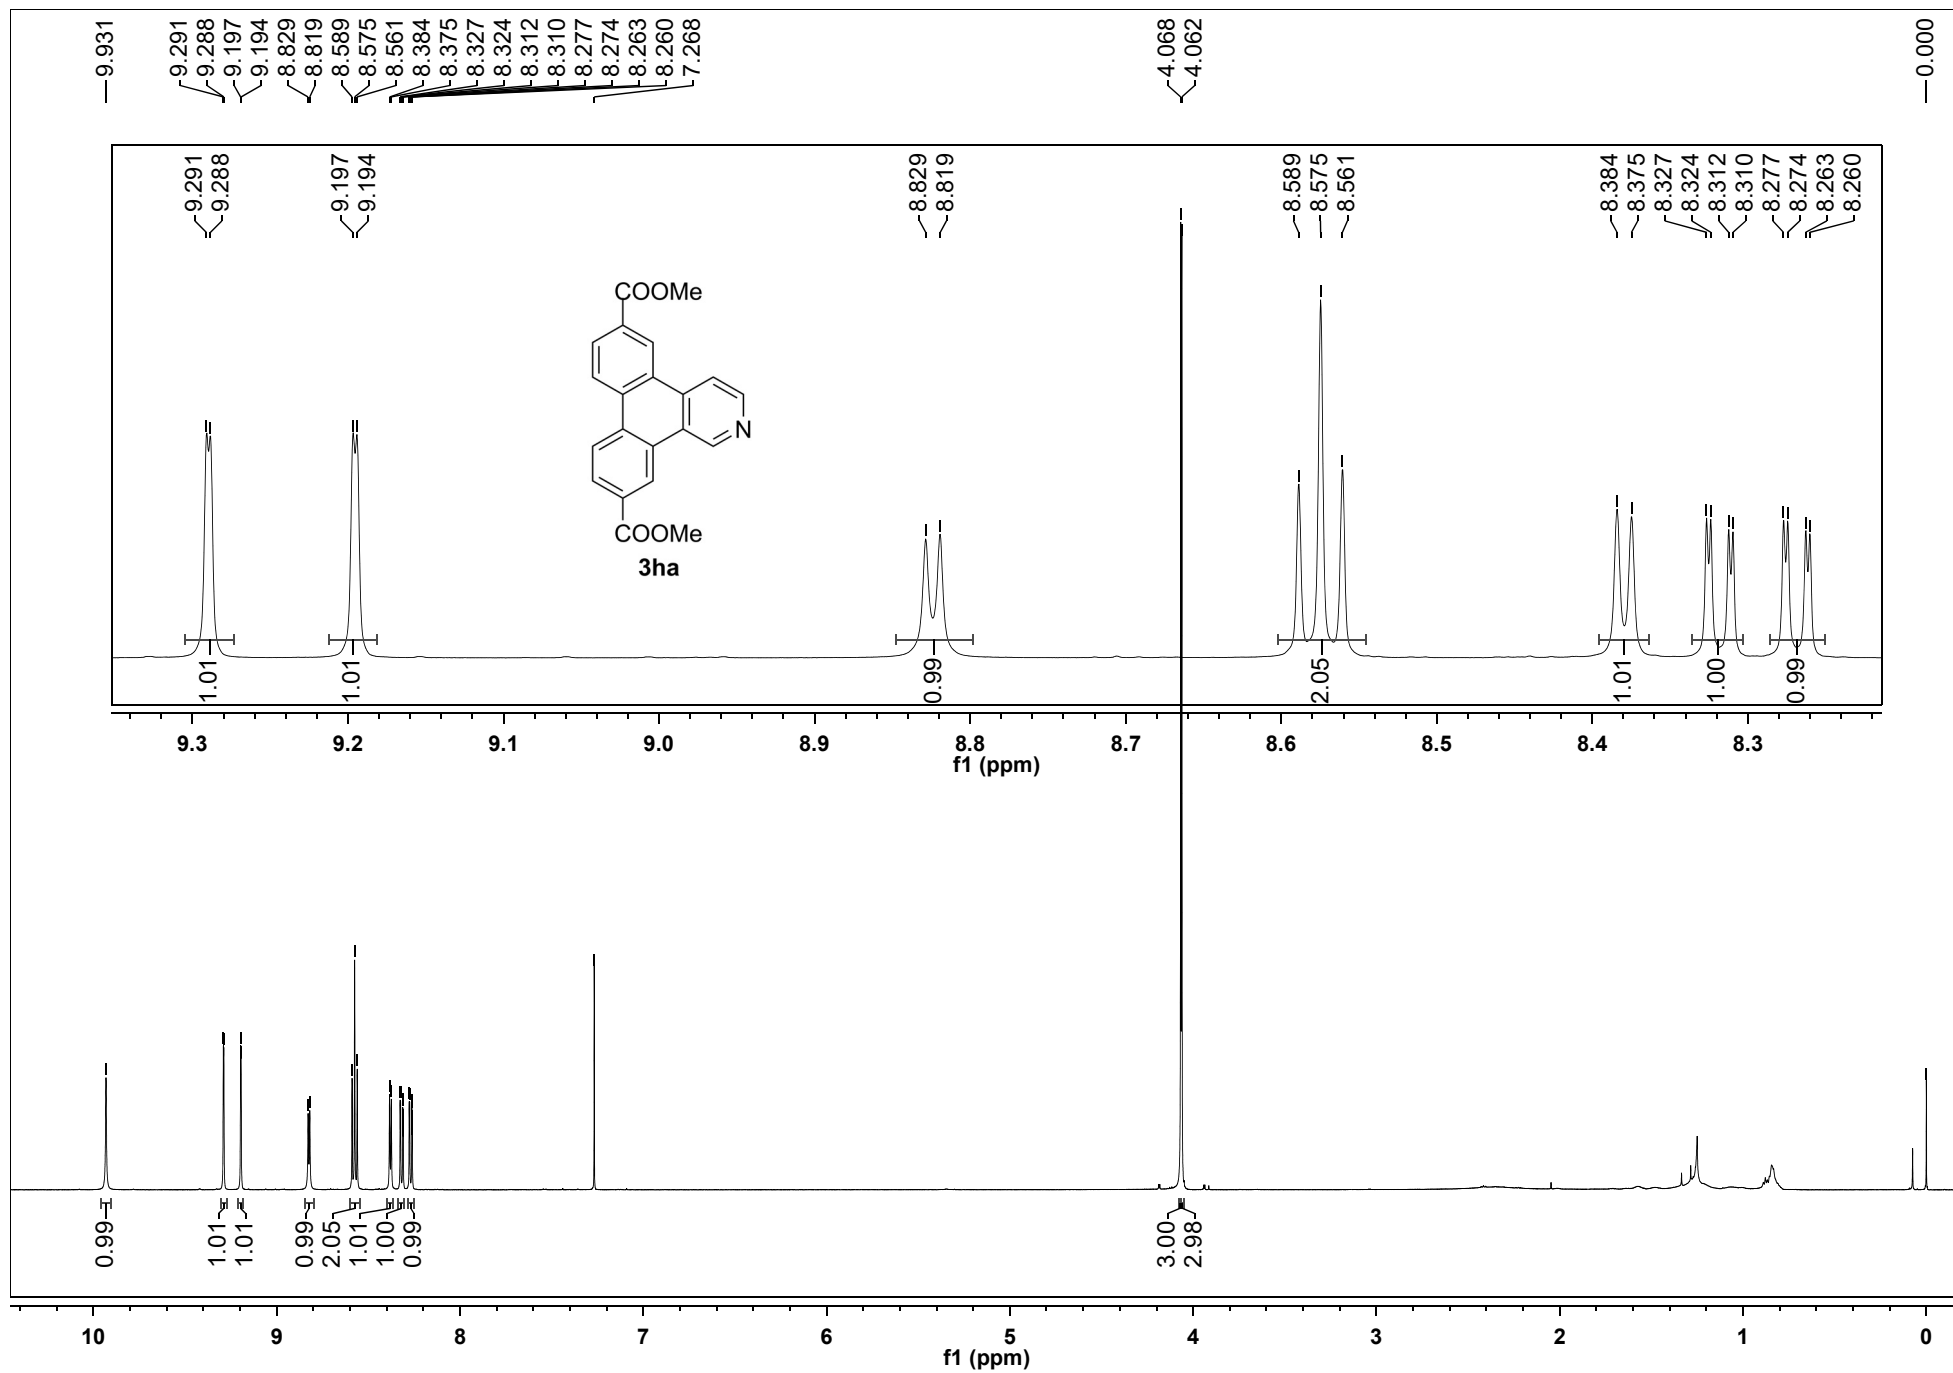

Figure S22.  $^{13}\text{C}\{^1\text{H}\}$  NMR spectrum (150 MHz,  $\text{CDCl}_3$ ) of 3ha

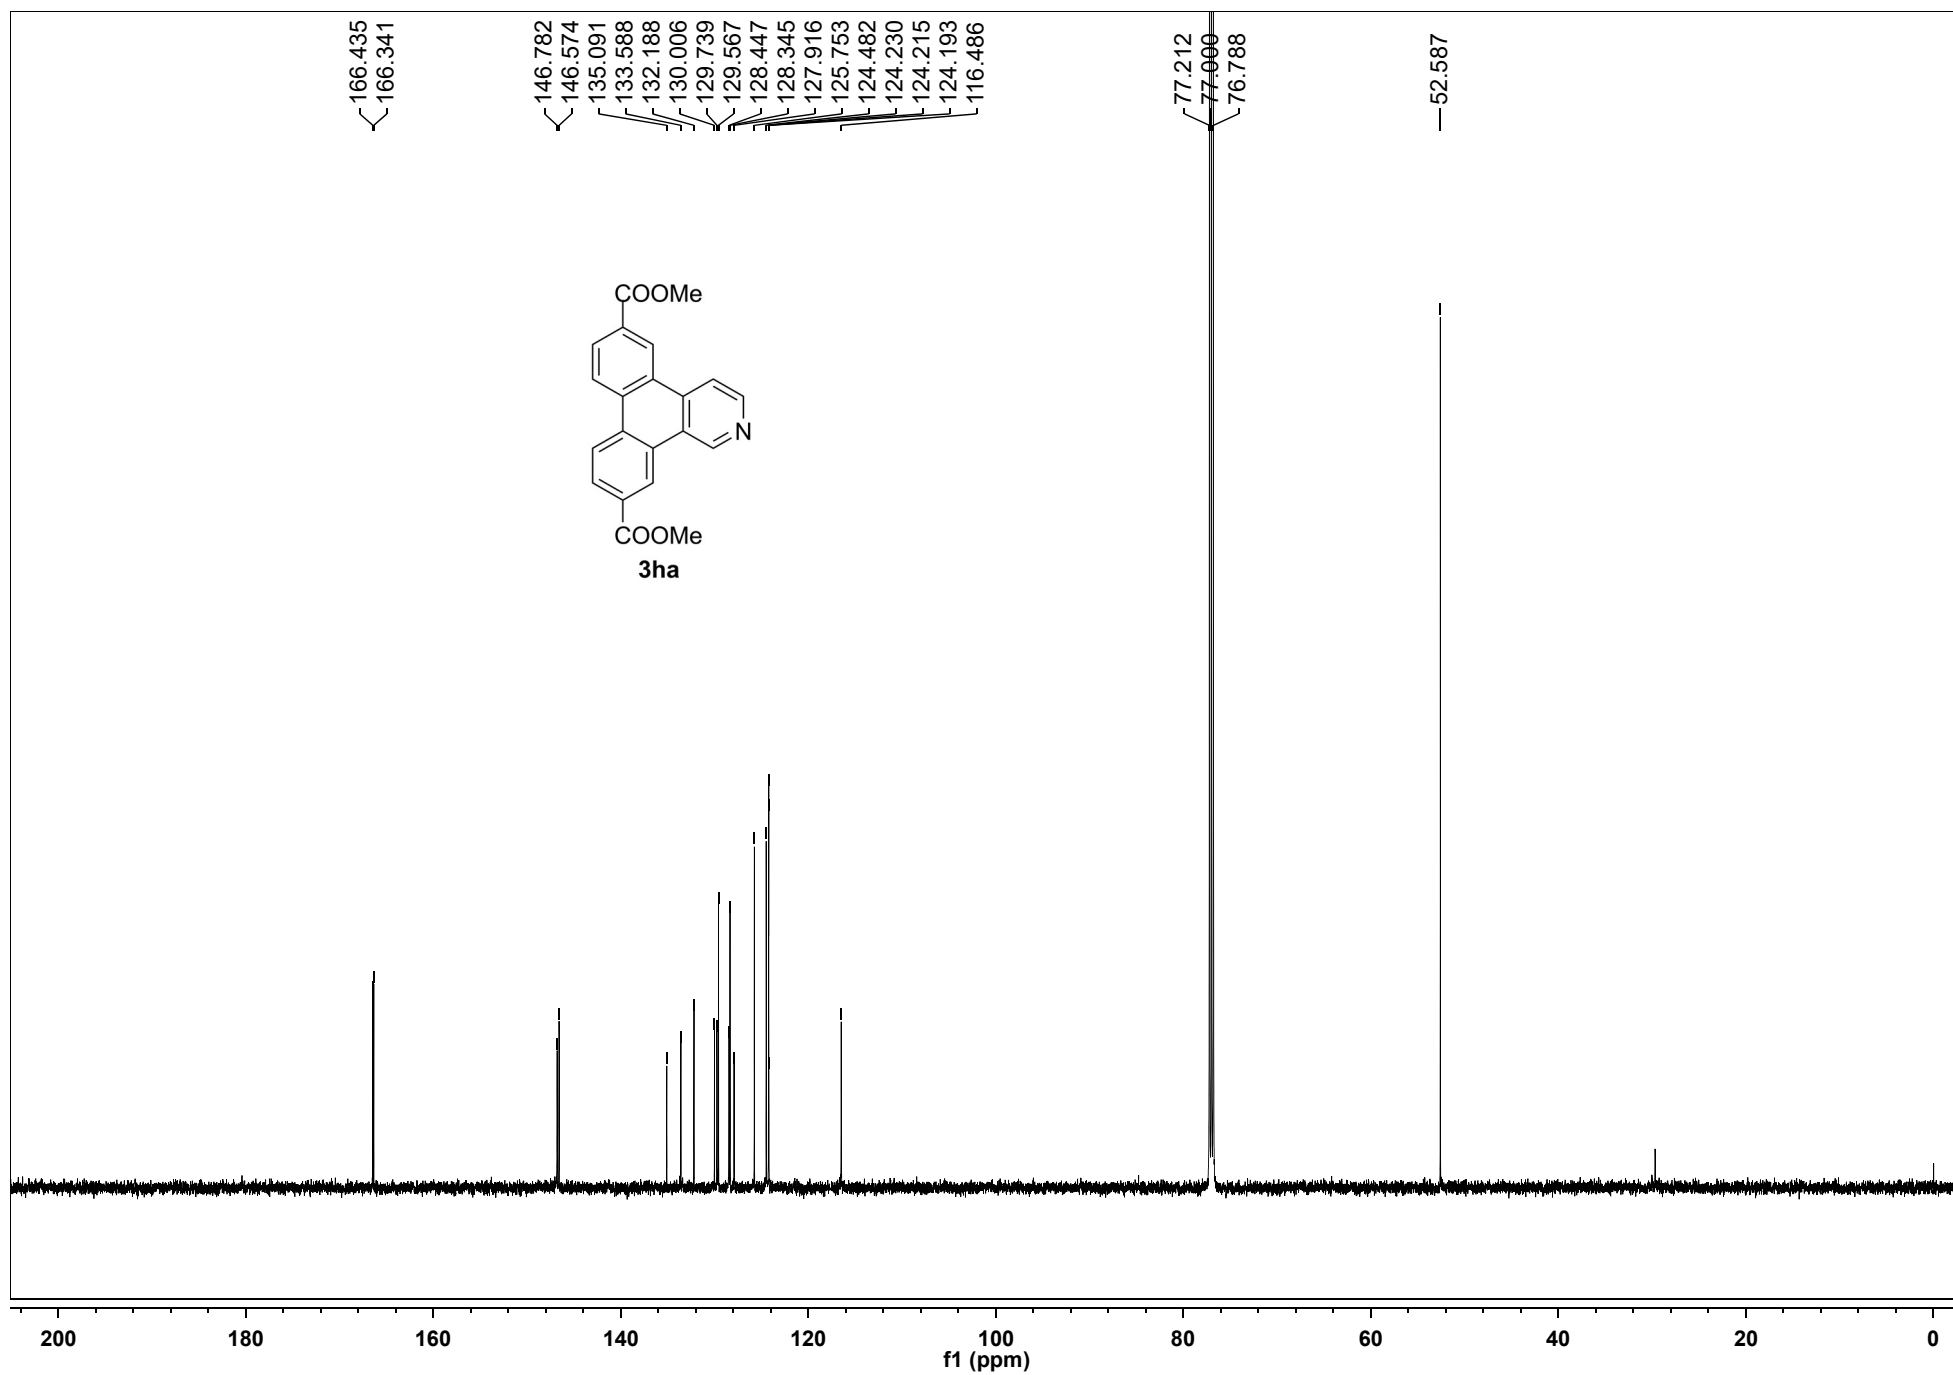

Figure S23. <sup>1</sup>H NMR spectrum (600 MHz, CDCl<sub>3</sub>) of 3ia

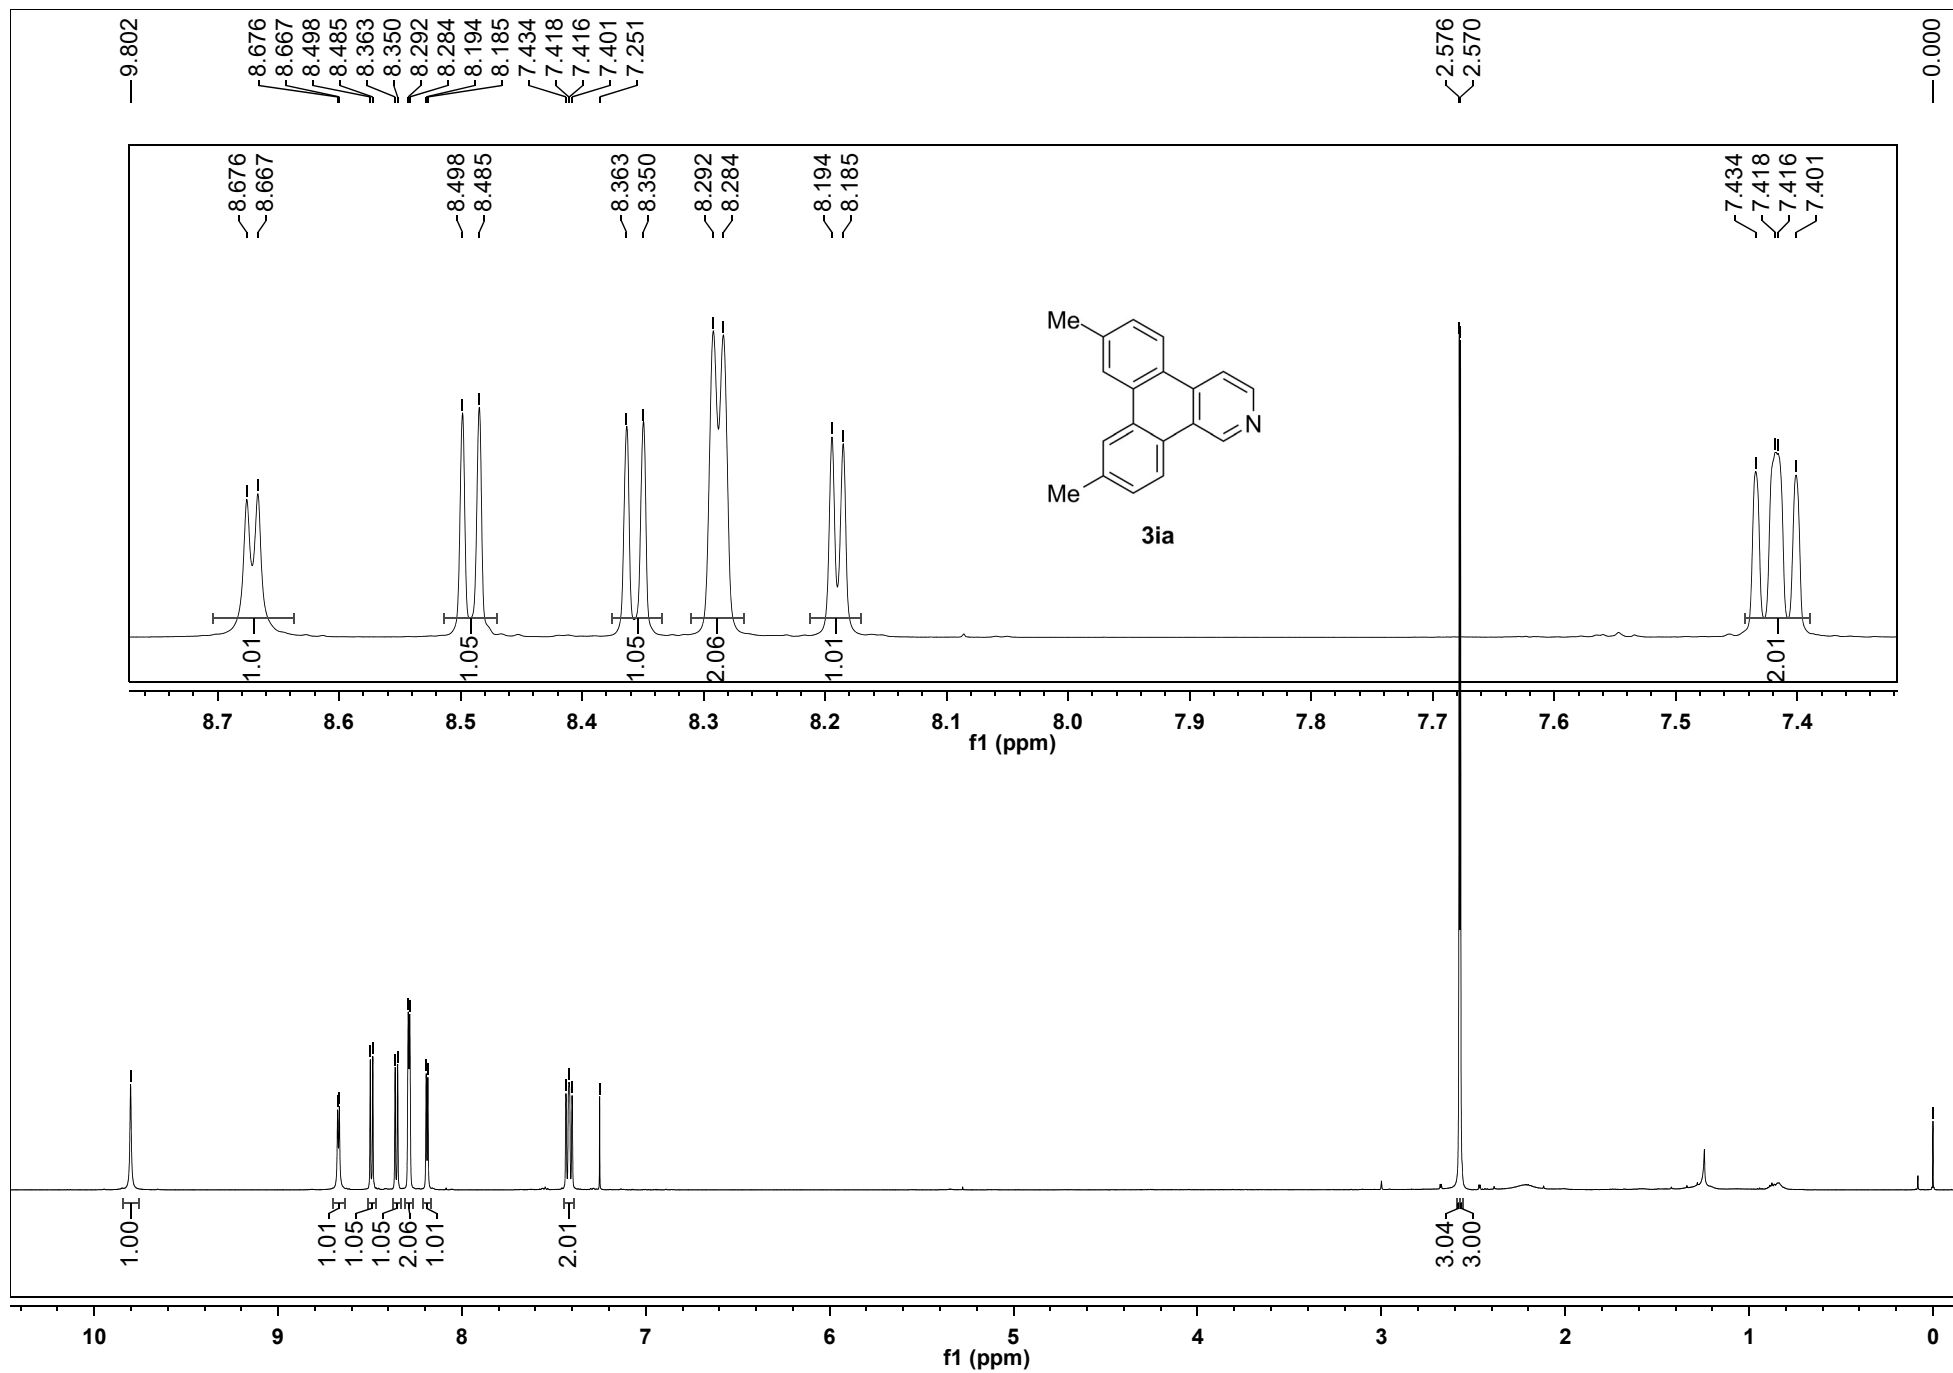



Figure S24.  $^{13}\text{C}\{^1\text{H}\}$  NMR spectrum (150 MHz,  $\text{CDCl}_3$ ) of 3ia

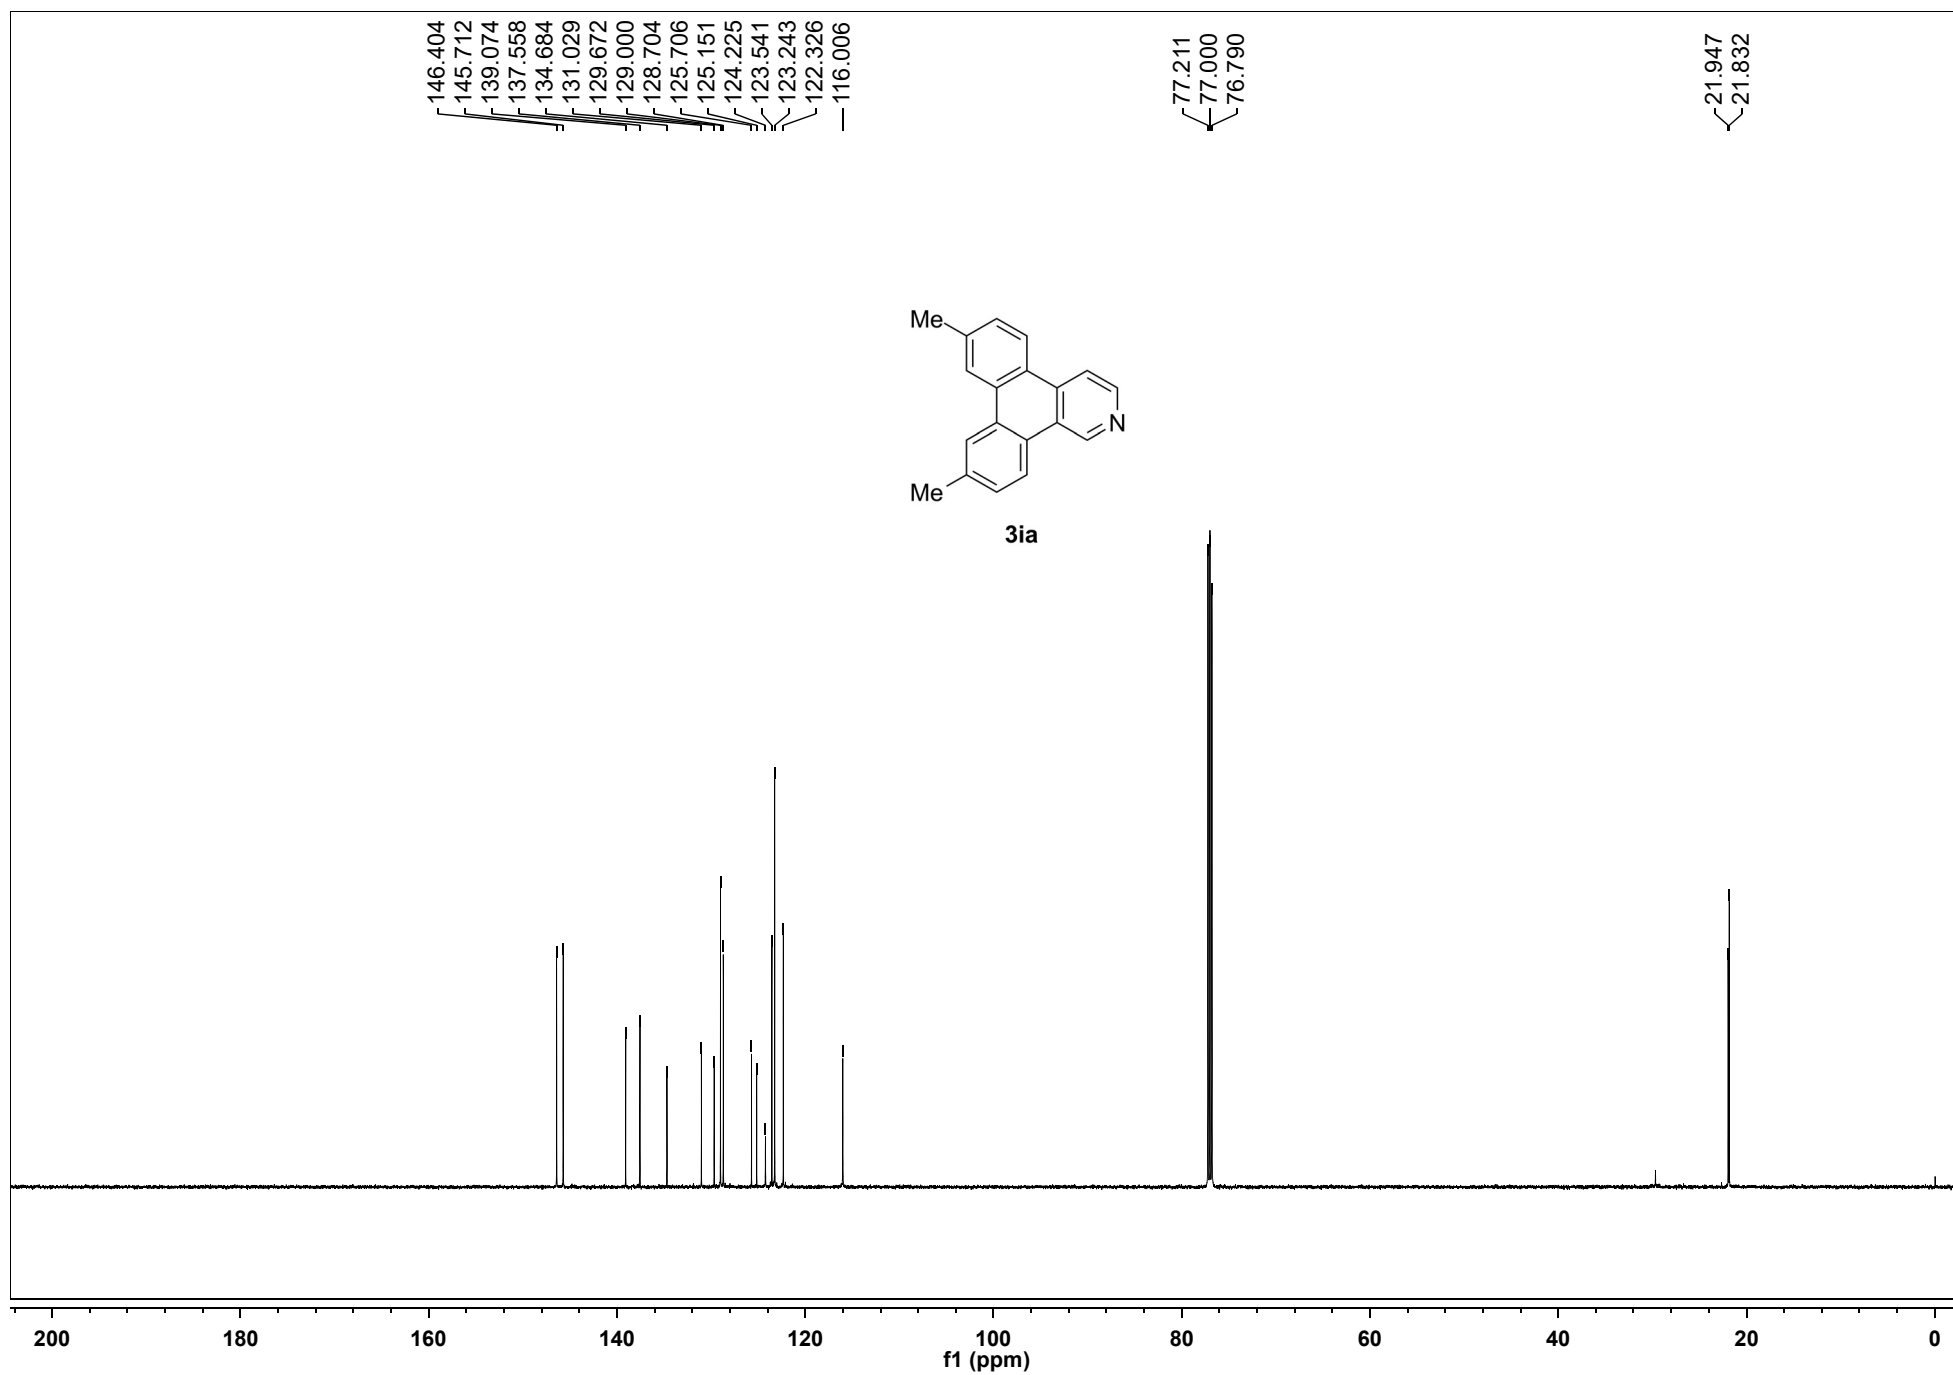

Figure S25. <sup>1</sup>H NMR spectrum (600 MHz, CDCl<sub>3</sub>) of 3ja

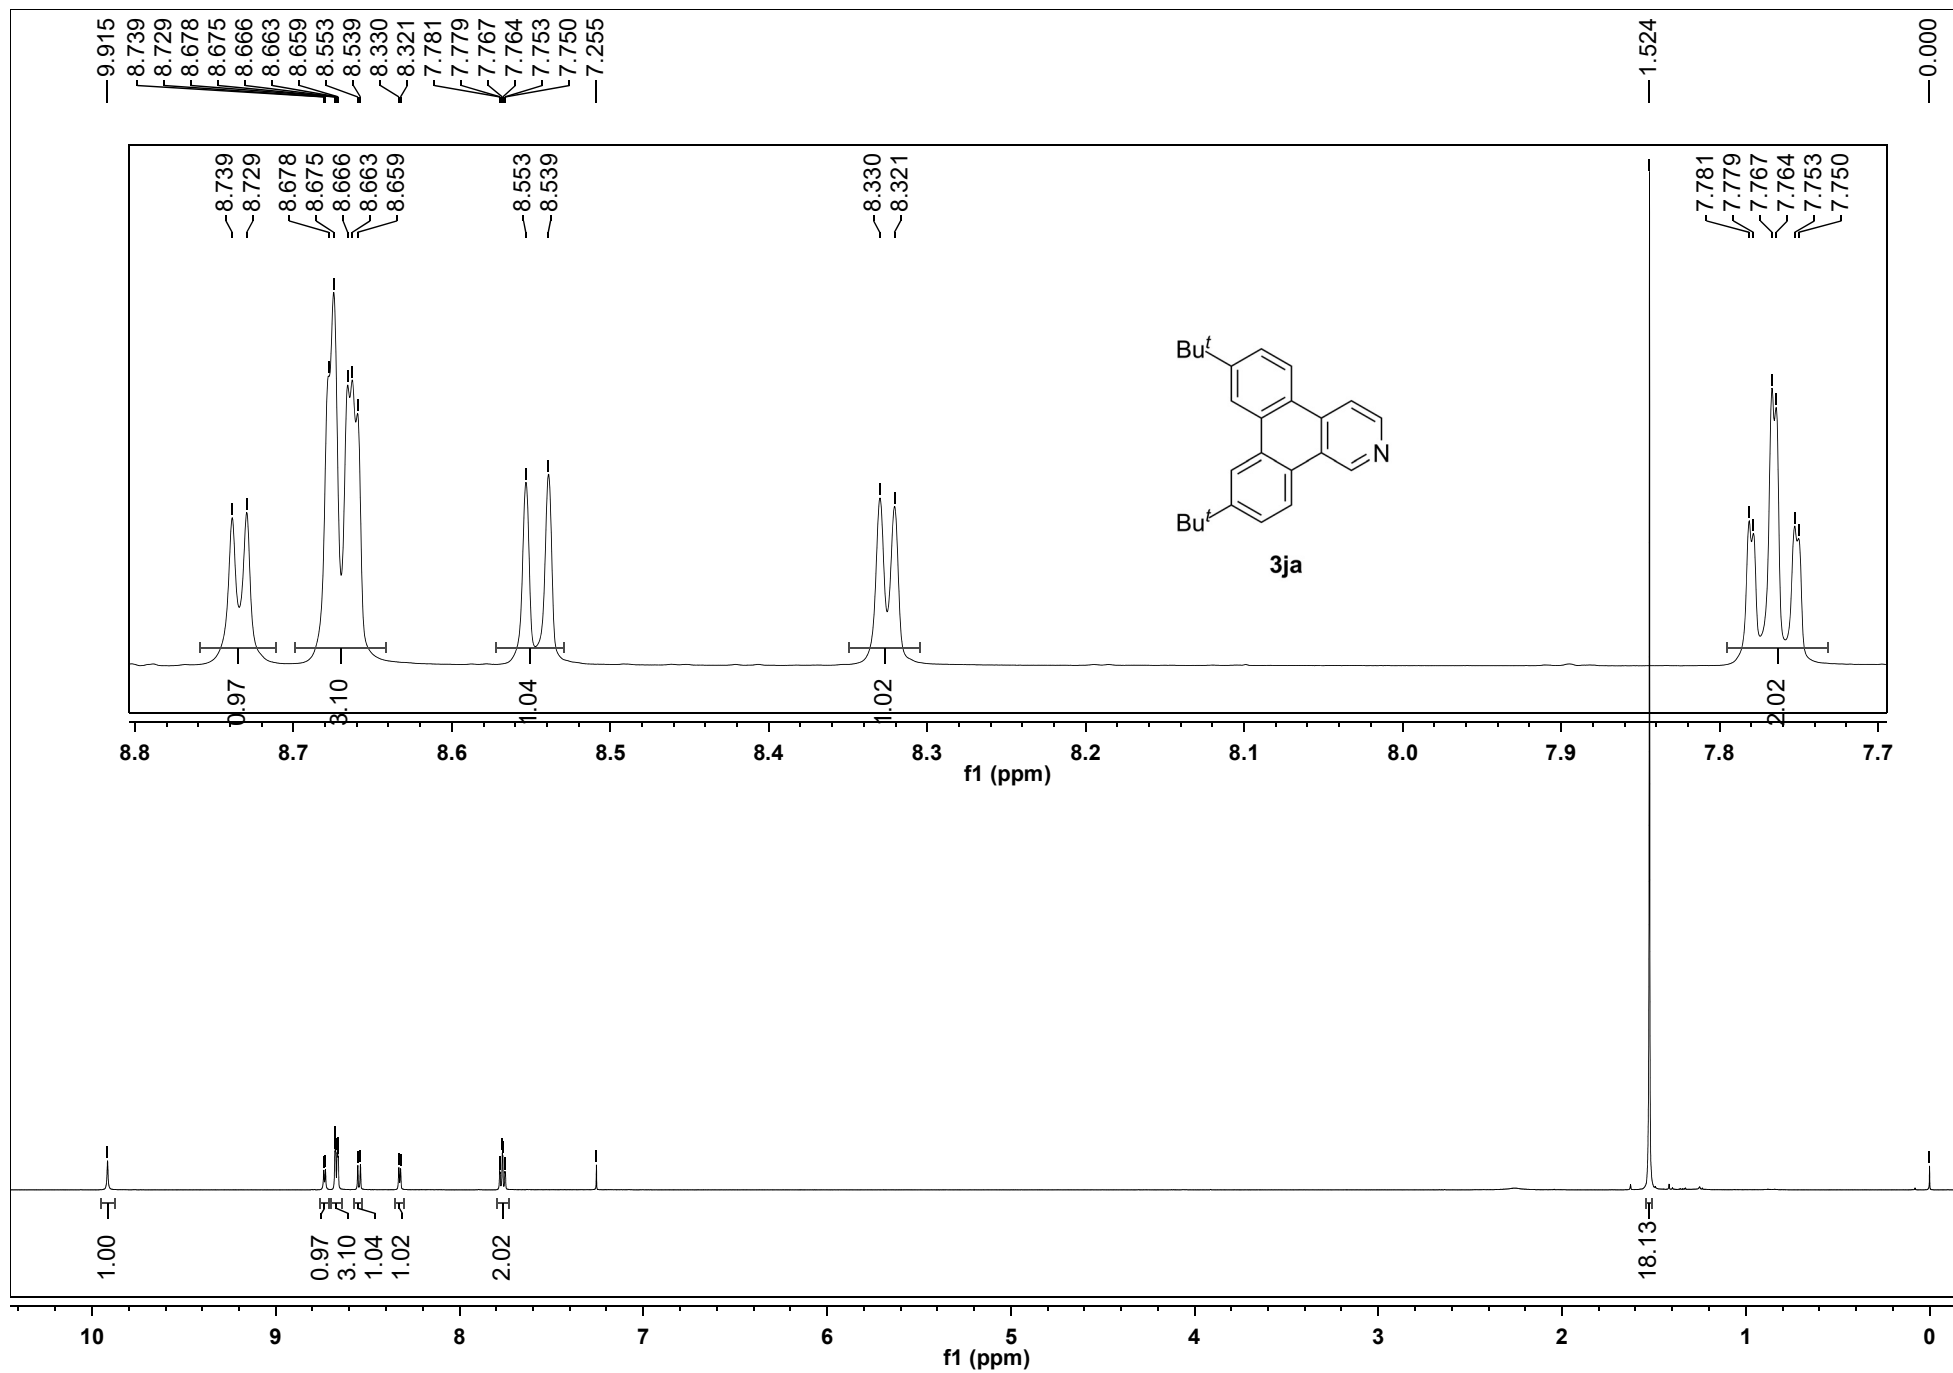

Figure S26.  $^{13}\text{C}\{^1\text{H}\}$  NMR spectrum (150 MHz,  $\text{CDCl}_3$ ) of 3ja

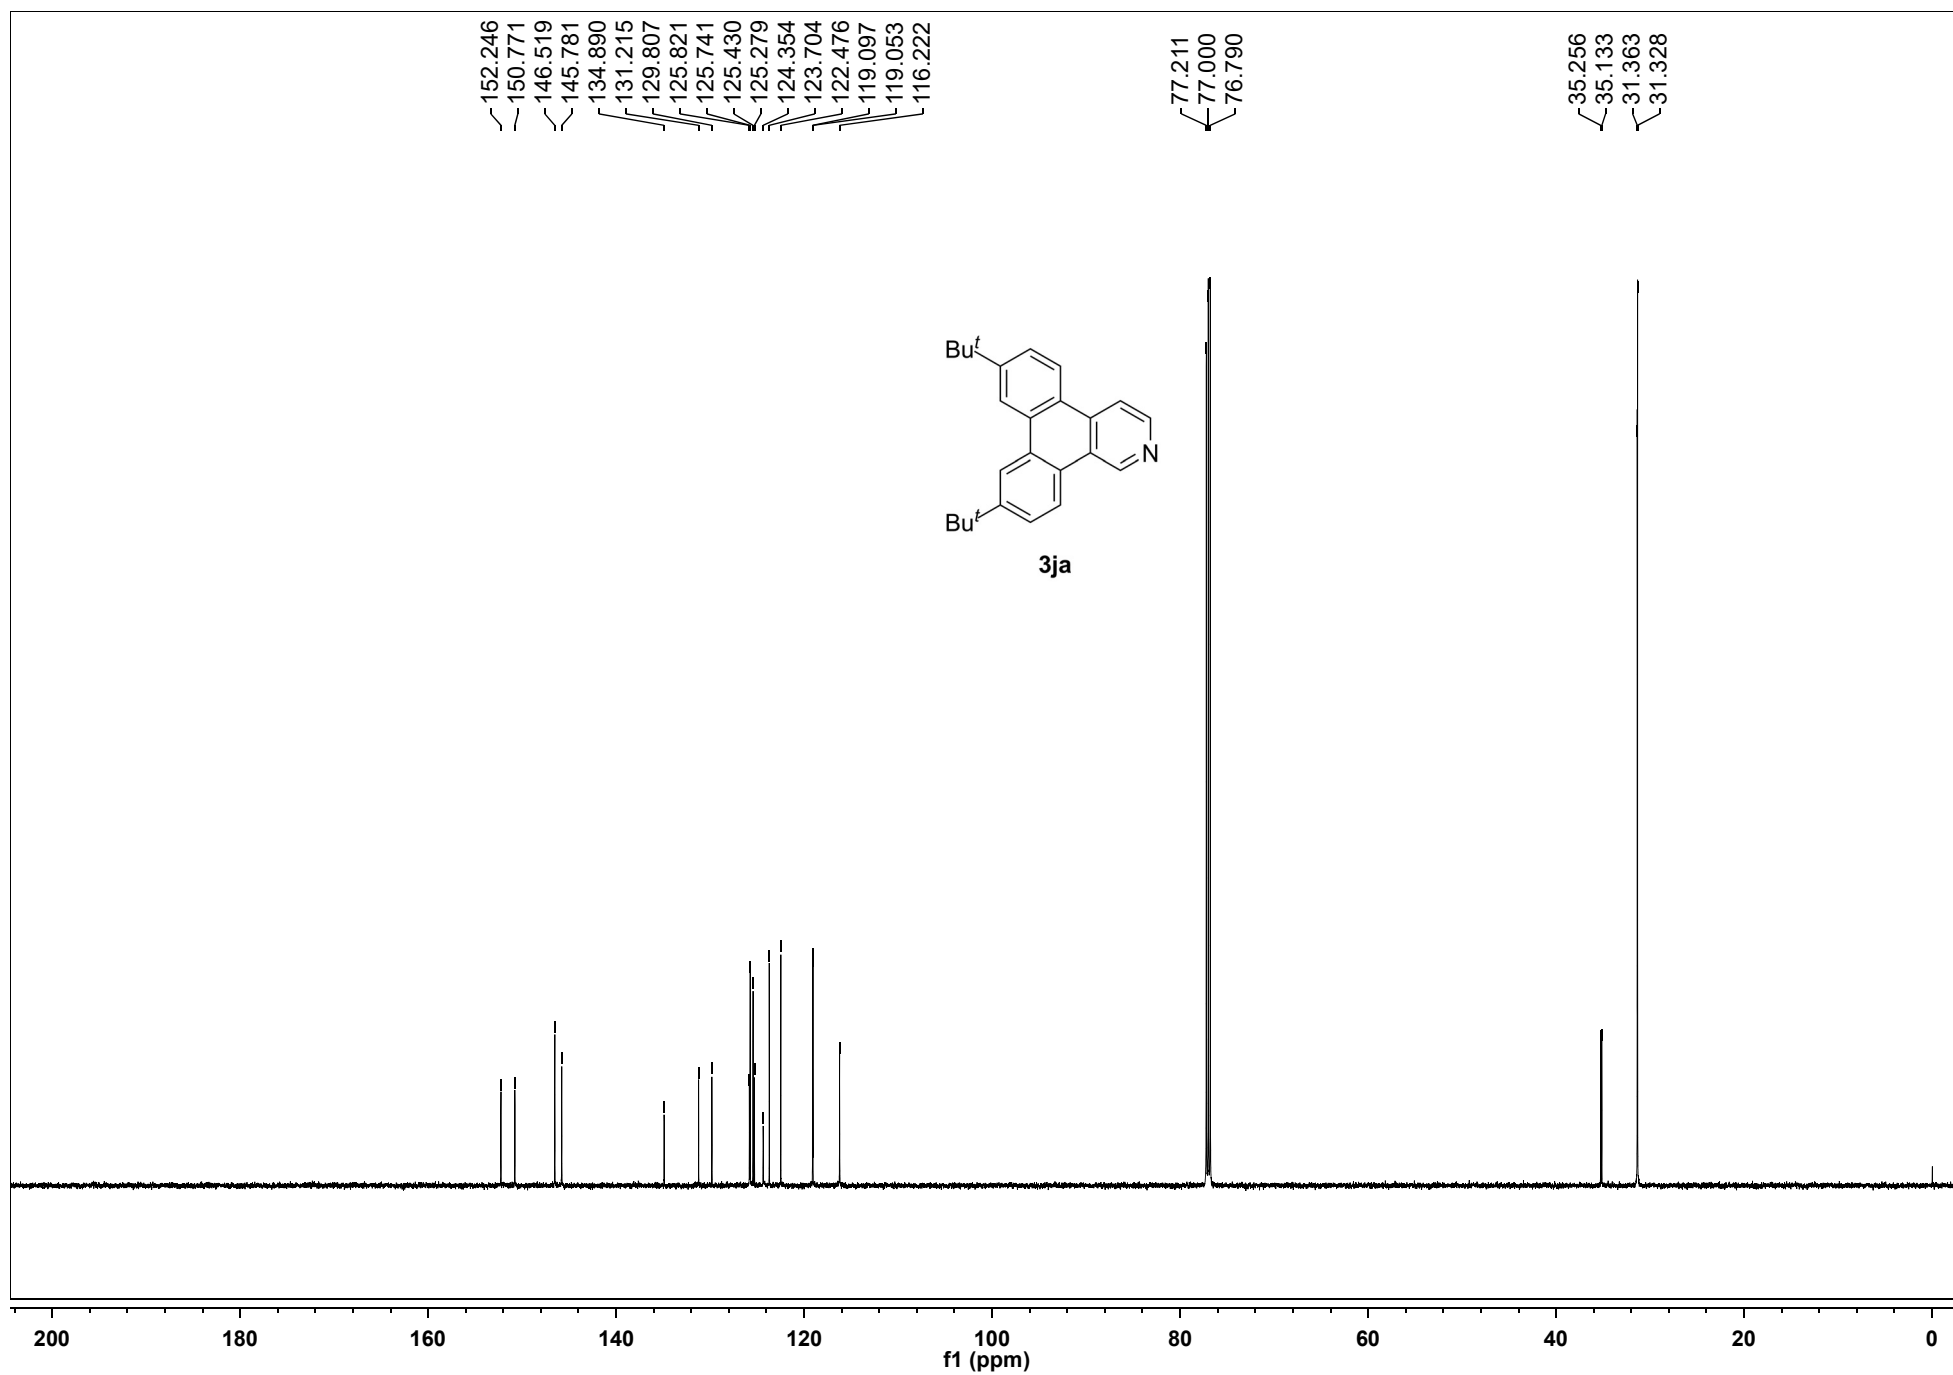

Figure S27. <sup>1</sup>H NMR spectrum (600 MHz, CDCl<sub>3</sub>) of 3ka

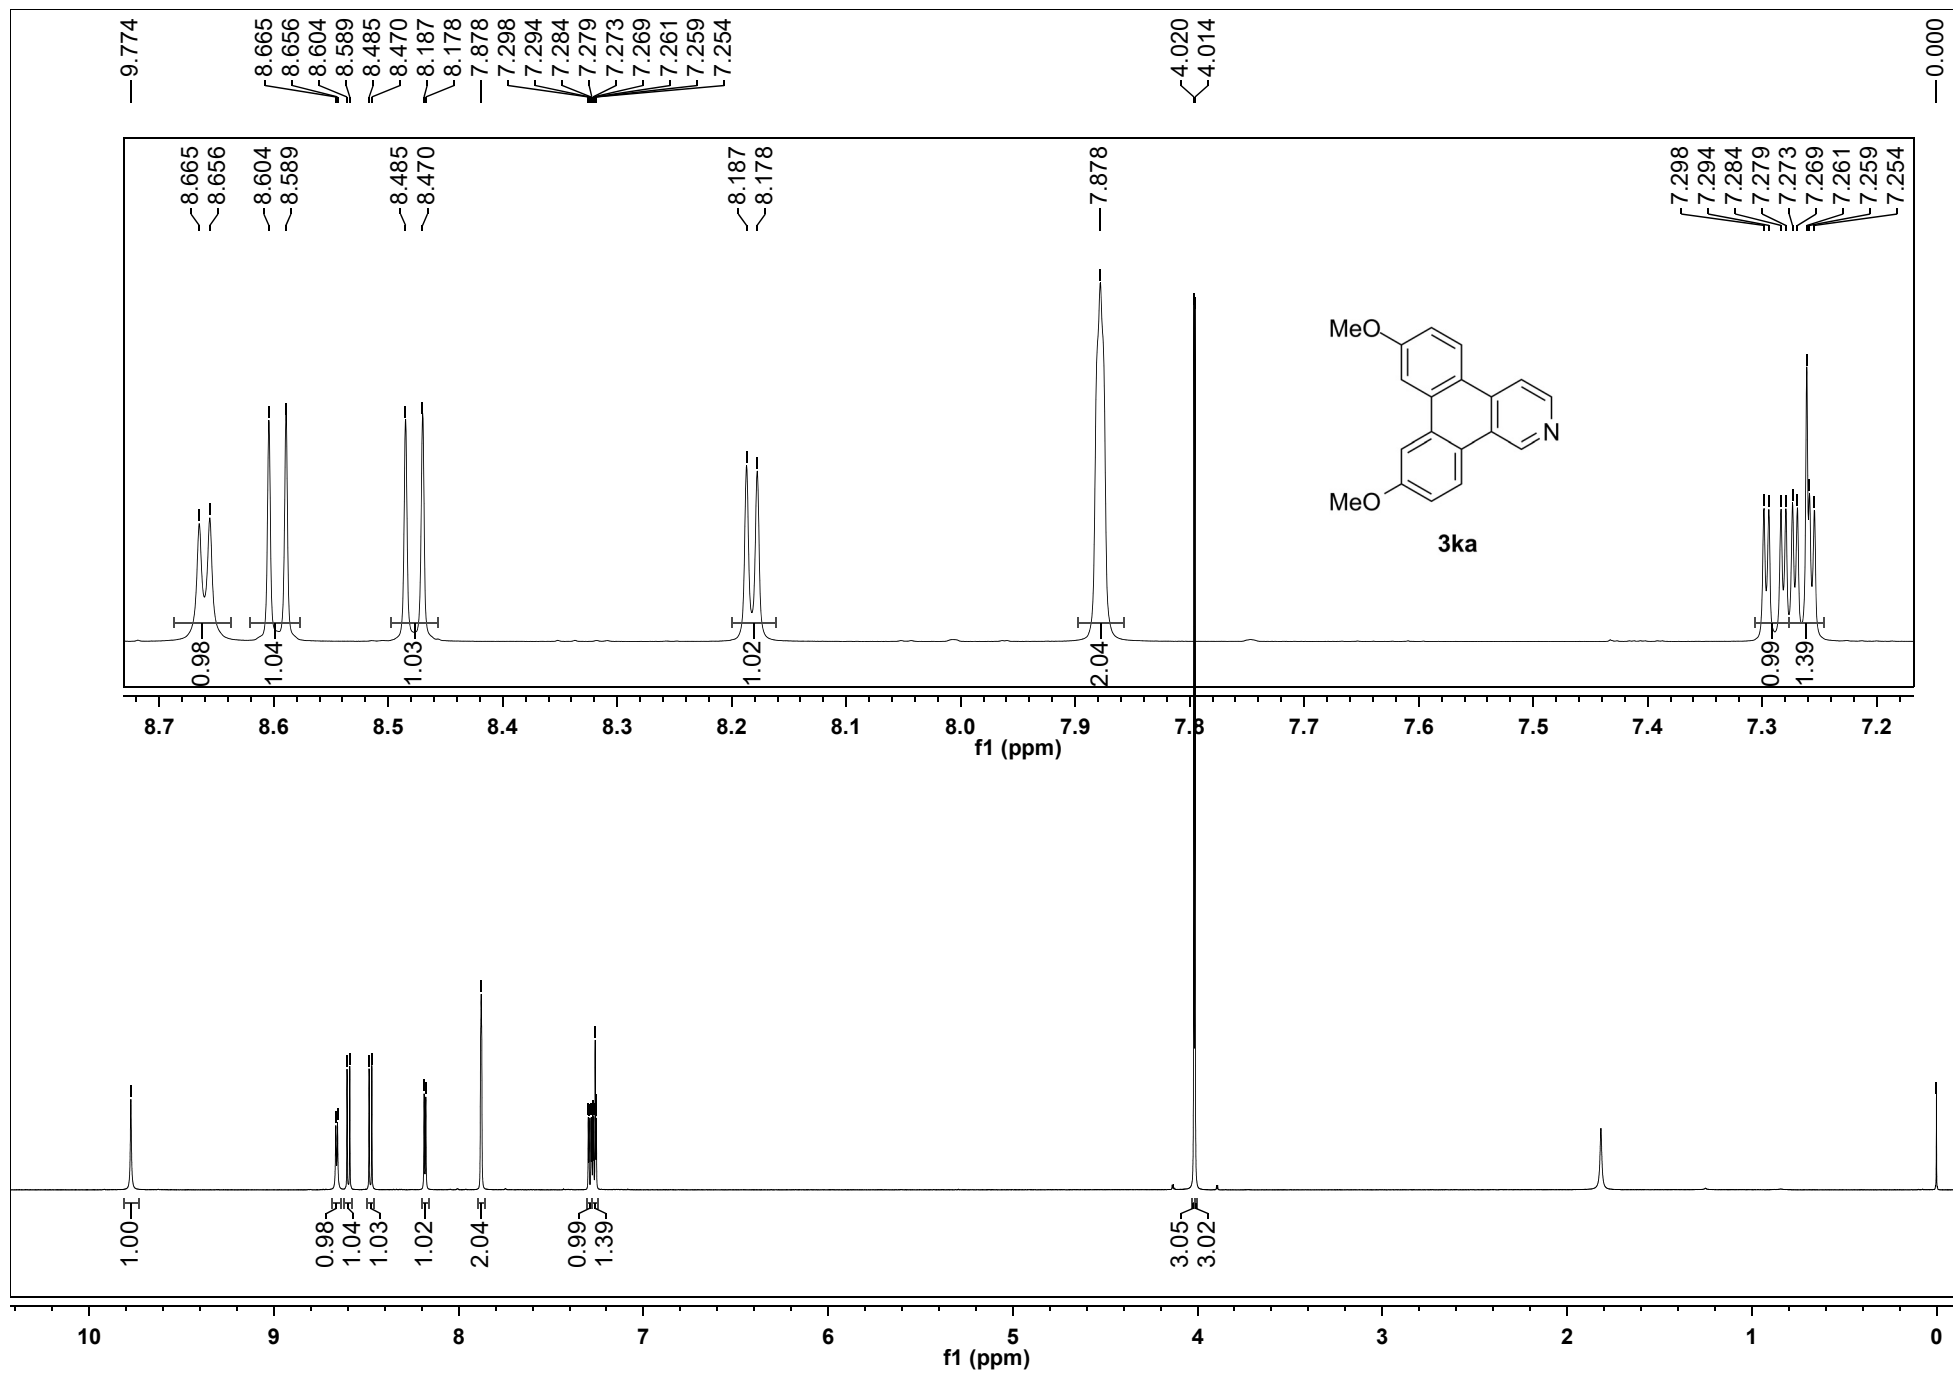

Figure S28.  $^{13}\text{C}\{^1\text{H}\}$  NMR spectrum (150 MHz,  $\text{CDCl}_3$ ) of 3ka

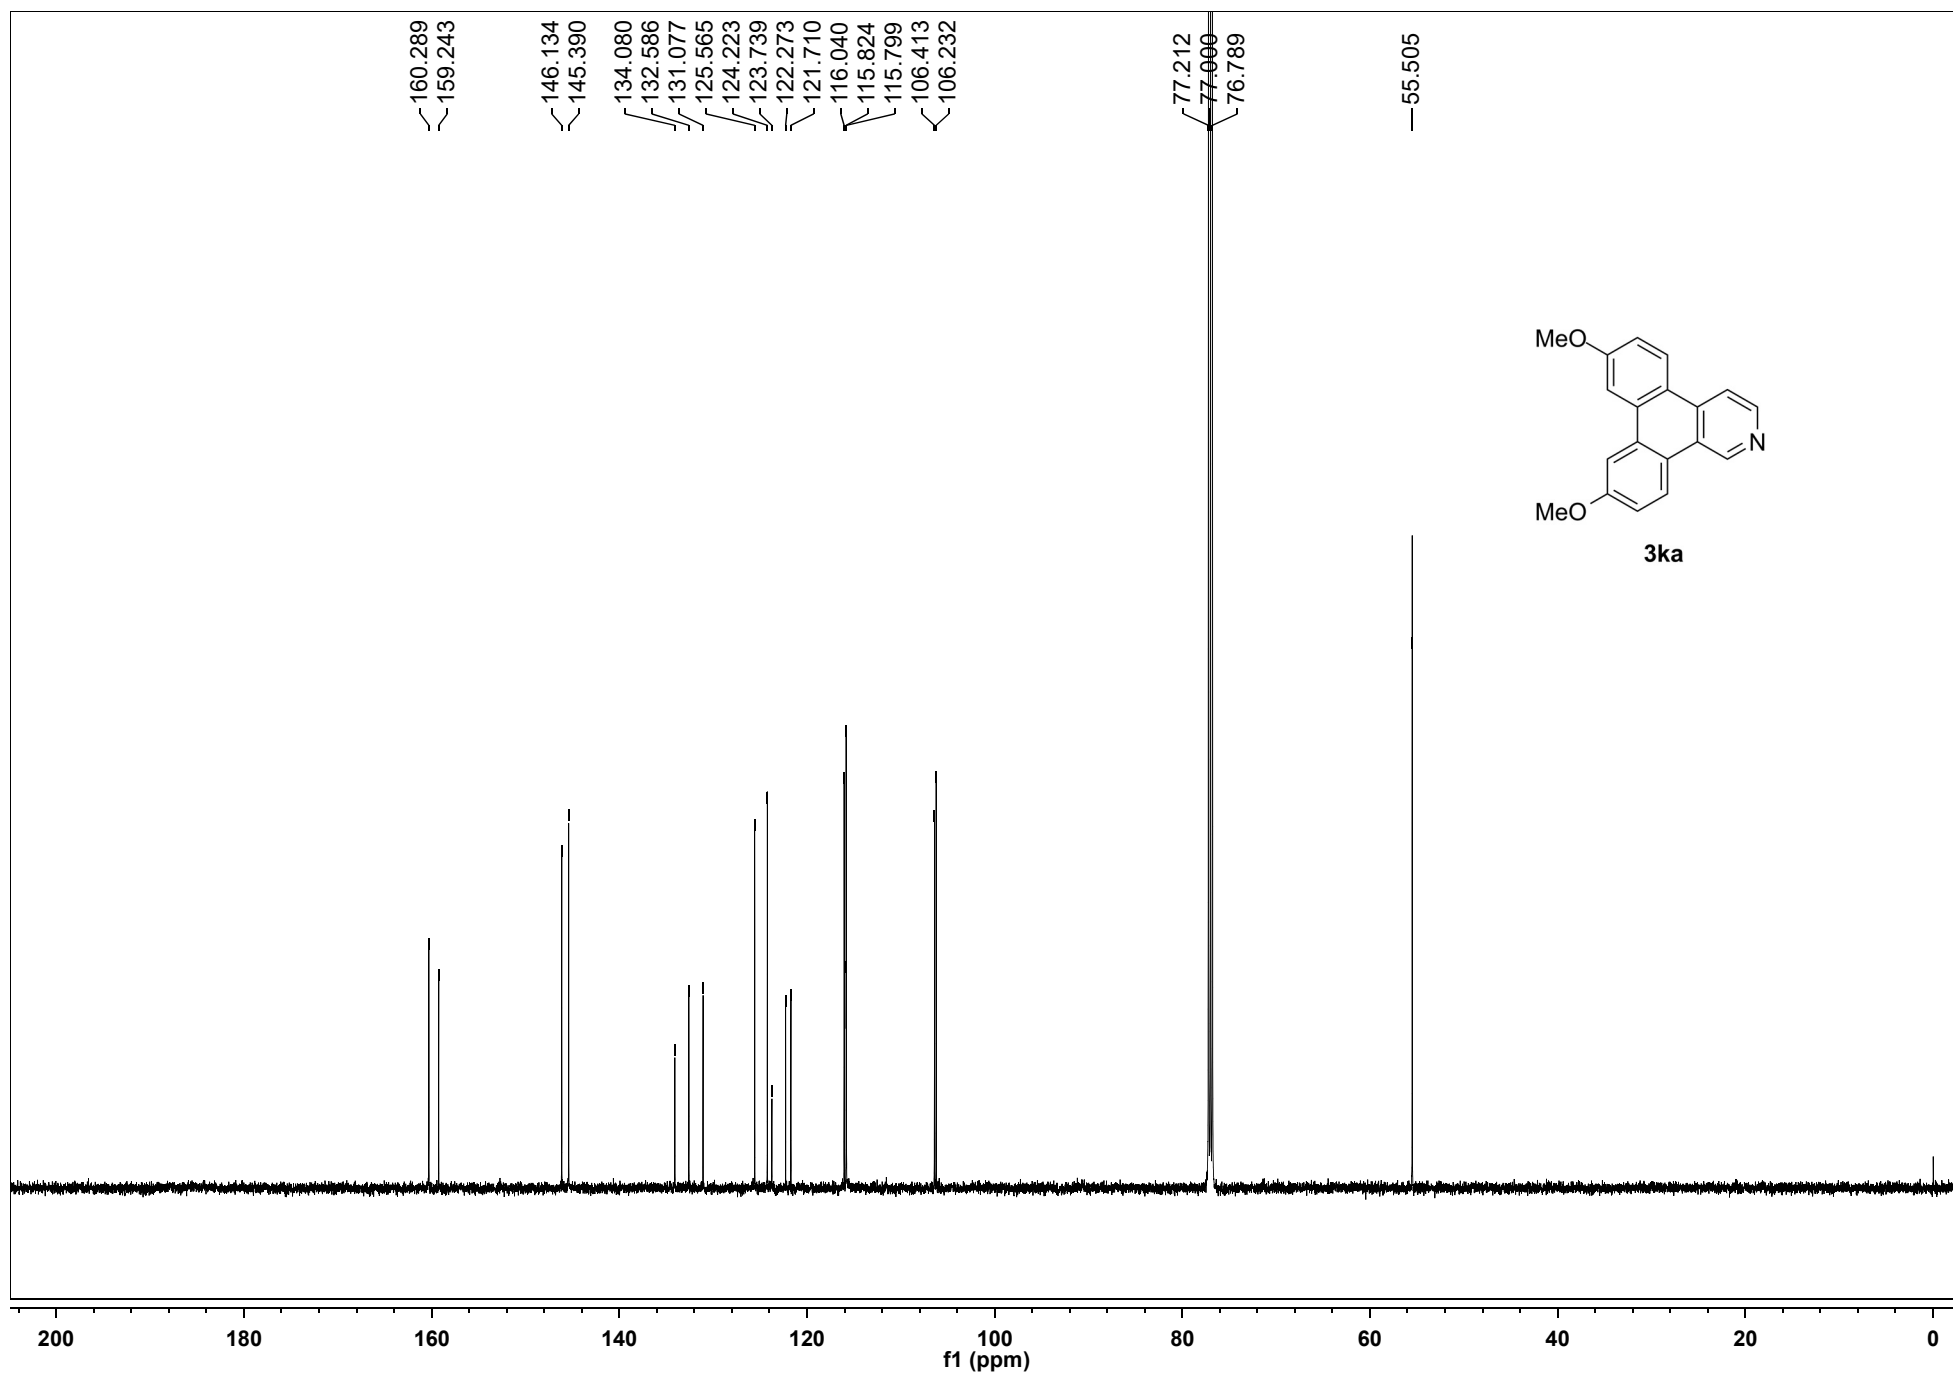

Figure S29. <sup>1</sup>H NMR spectrum (600 MHz, CDCl<sub>3</sub>) of 3a

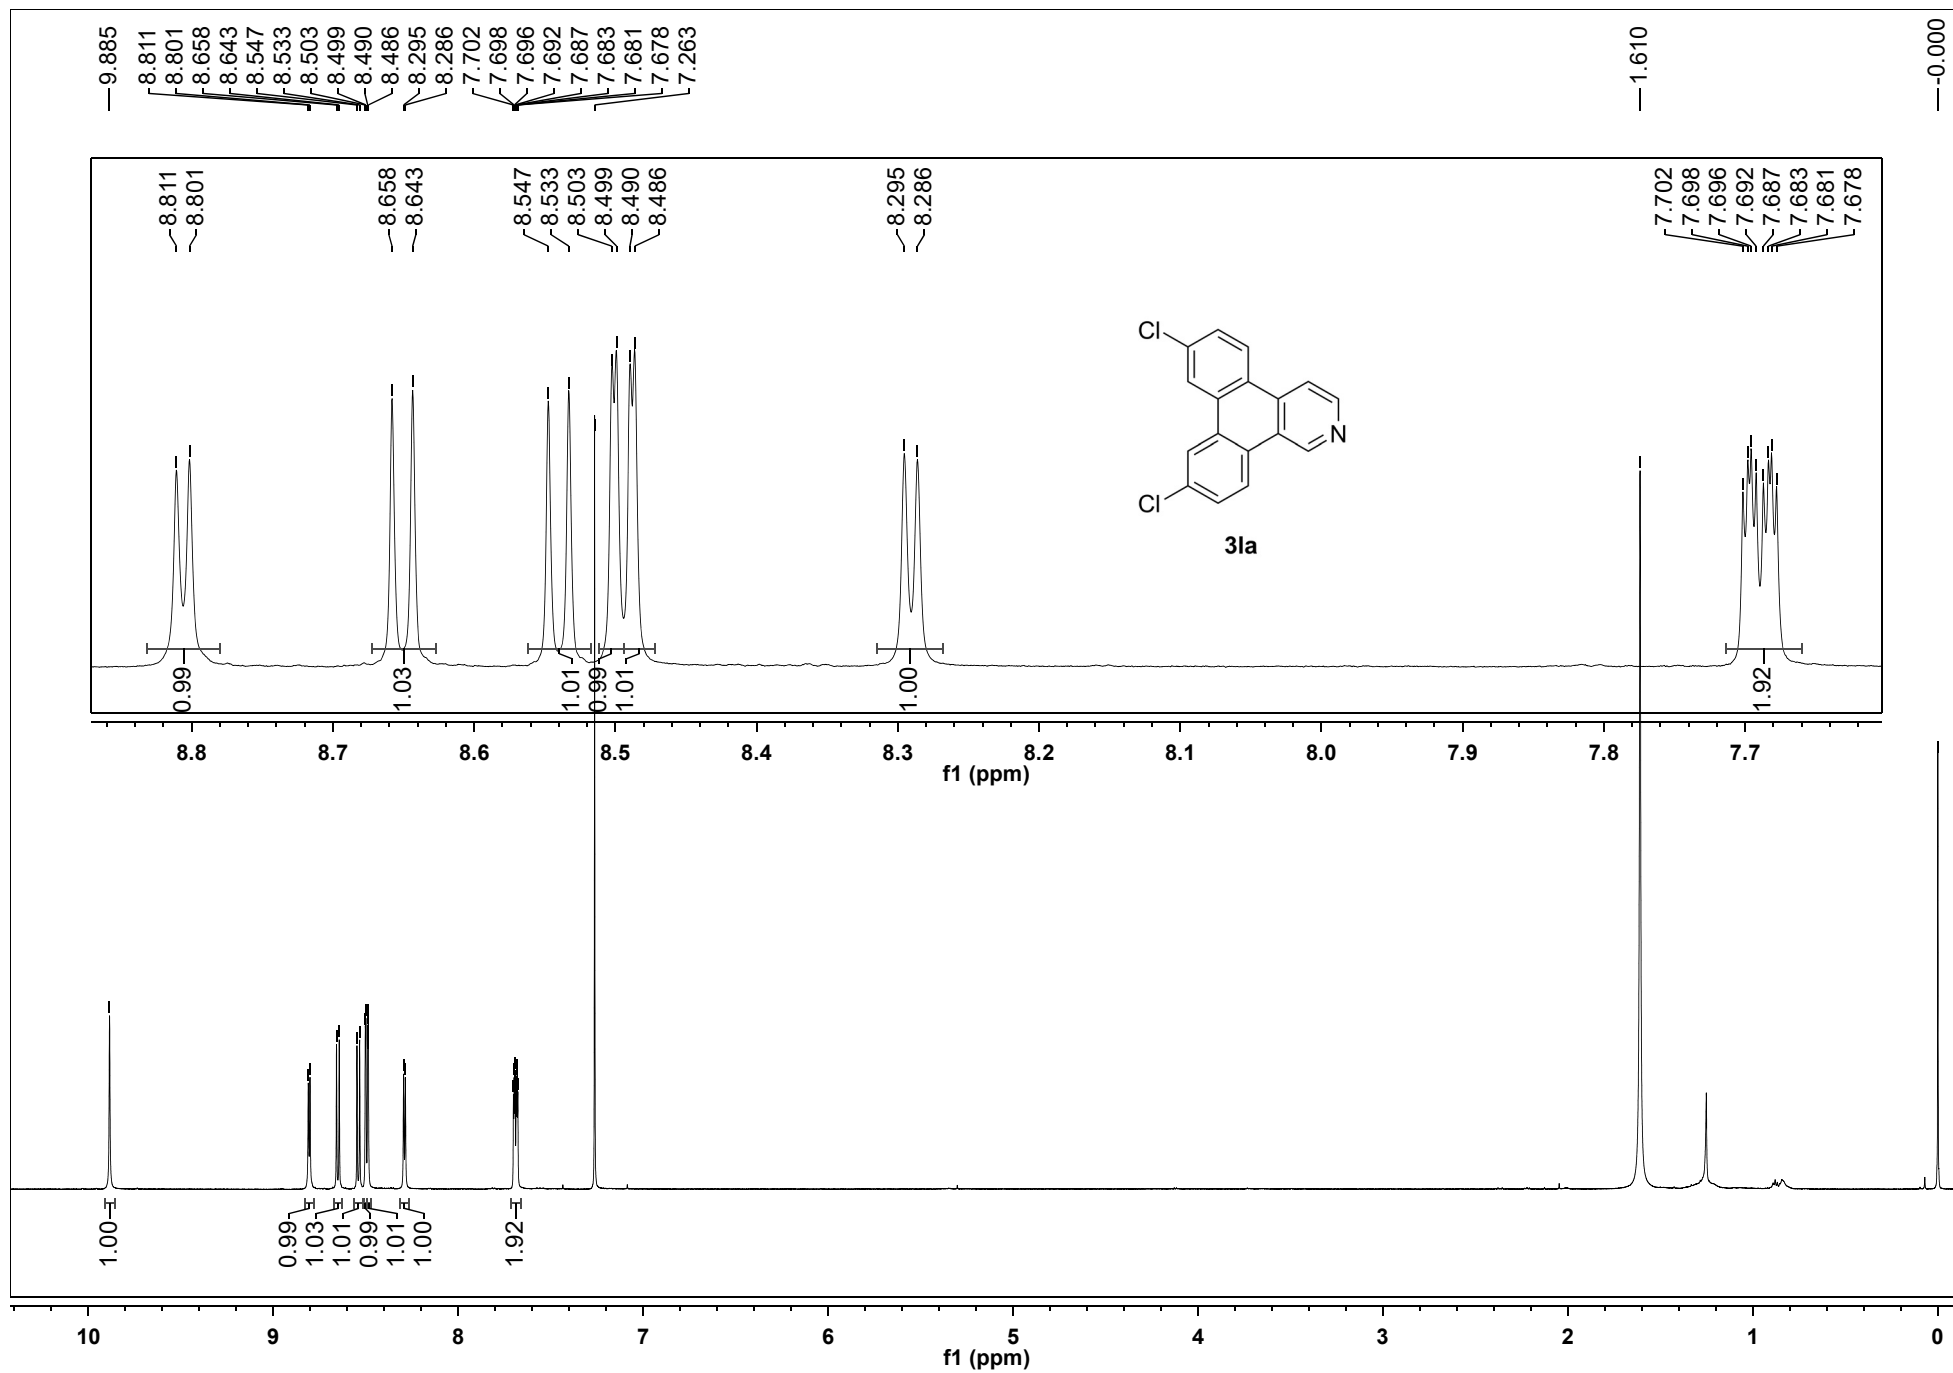

Figure S30.  $^{13}\text{C}\{^1\text{H}\}$  NMR spectrum (150 MHz,  $\text{CDCl}_3$ ) of 3la

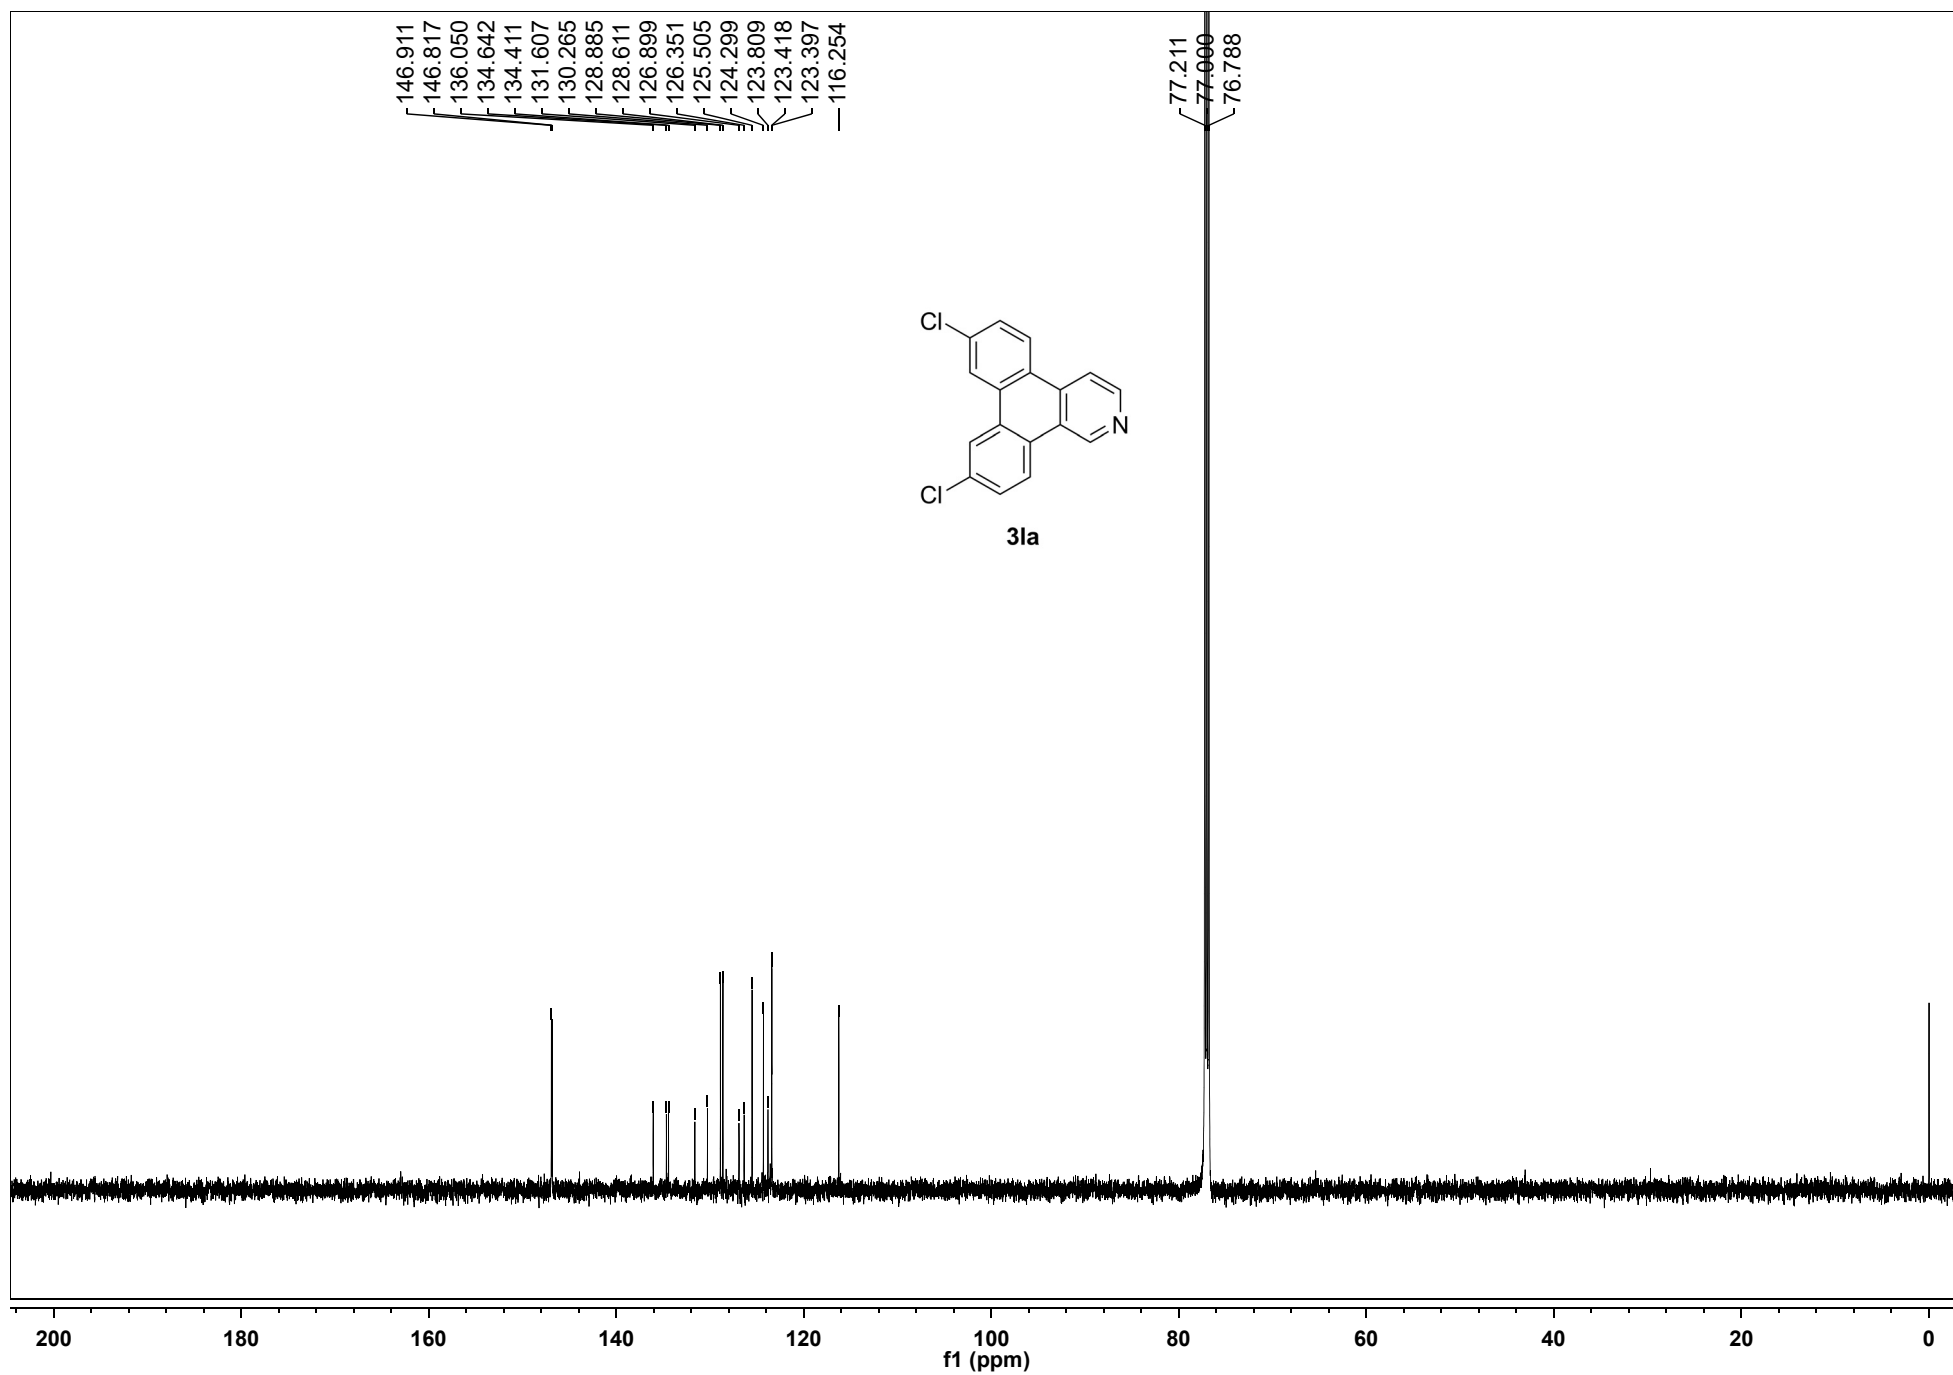

Figure S31. <sup>1</sup>H NMR spectrum (600 MHz, CDCl<sub>3</sub>) of 3ma

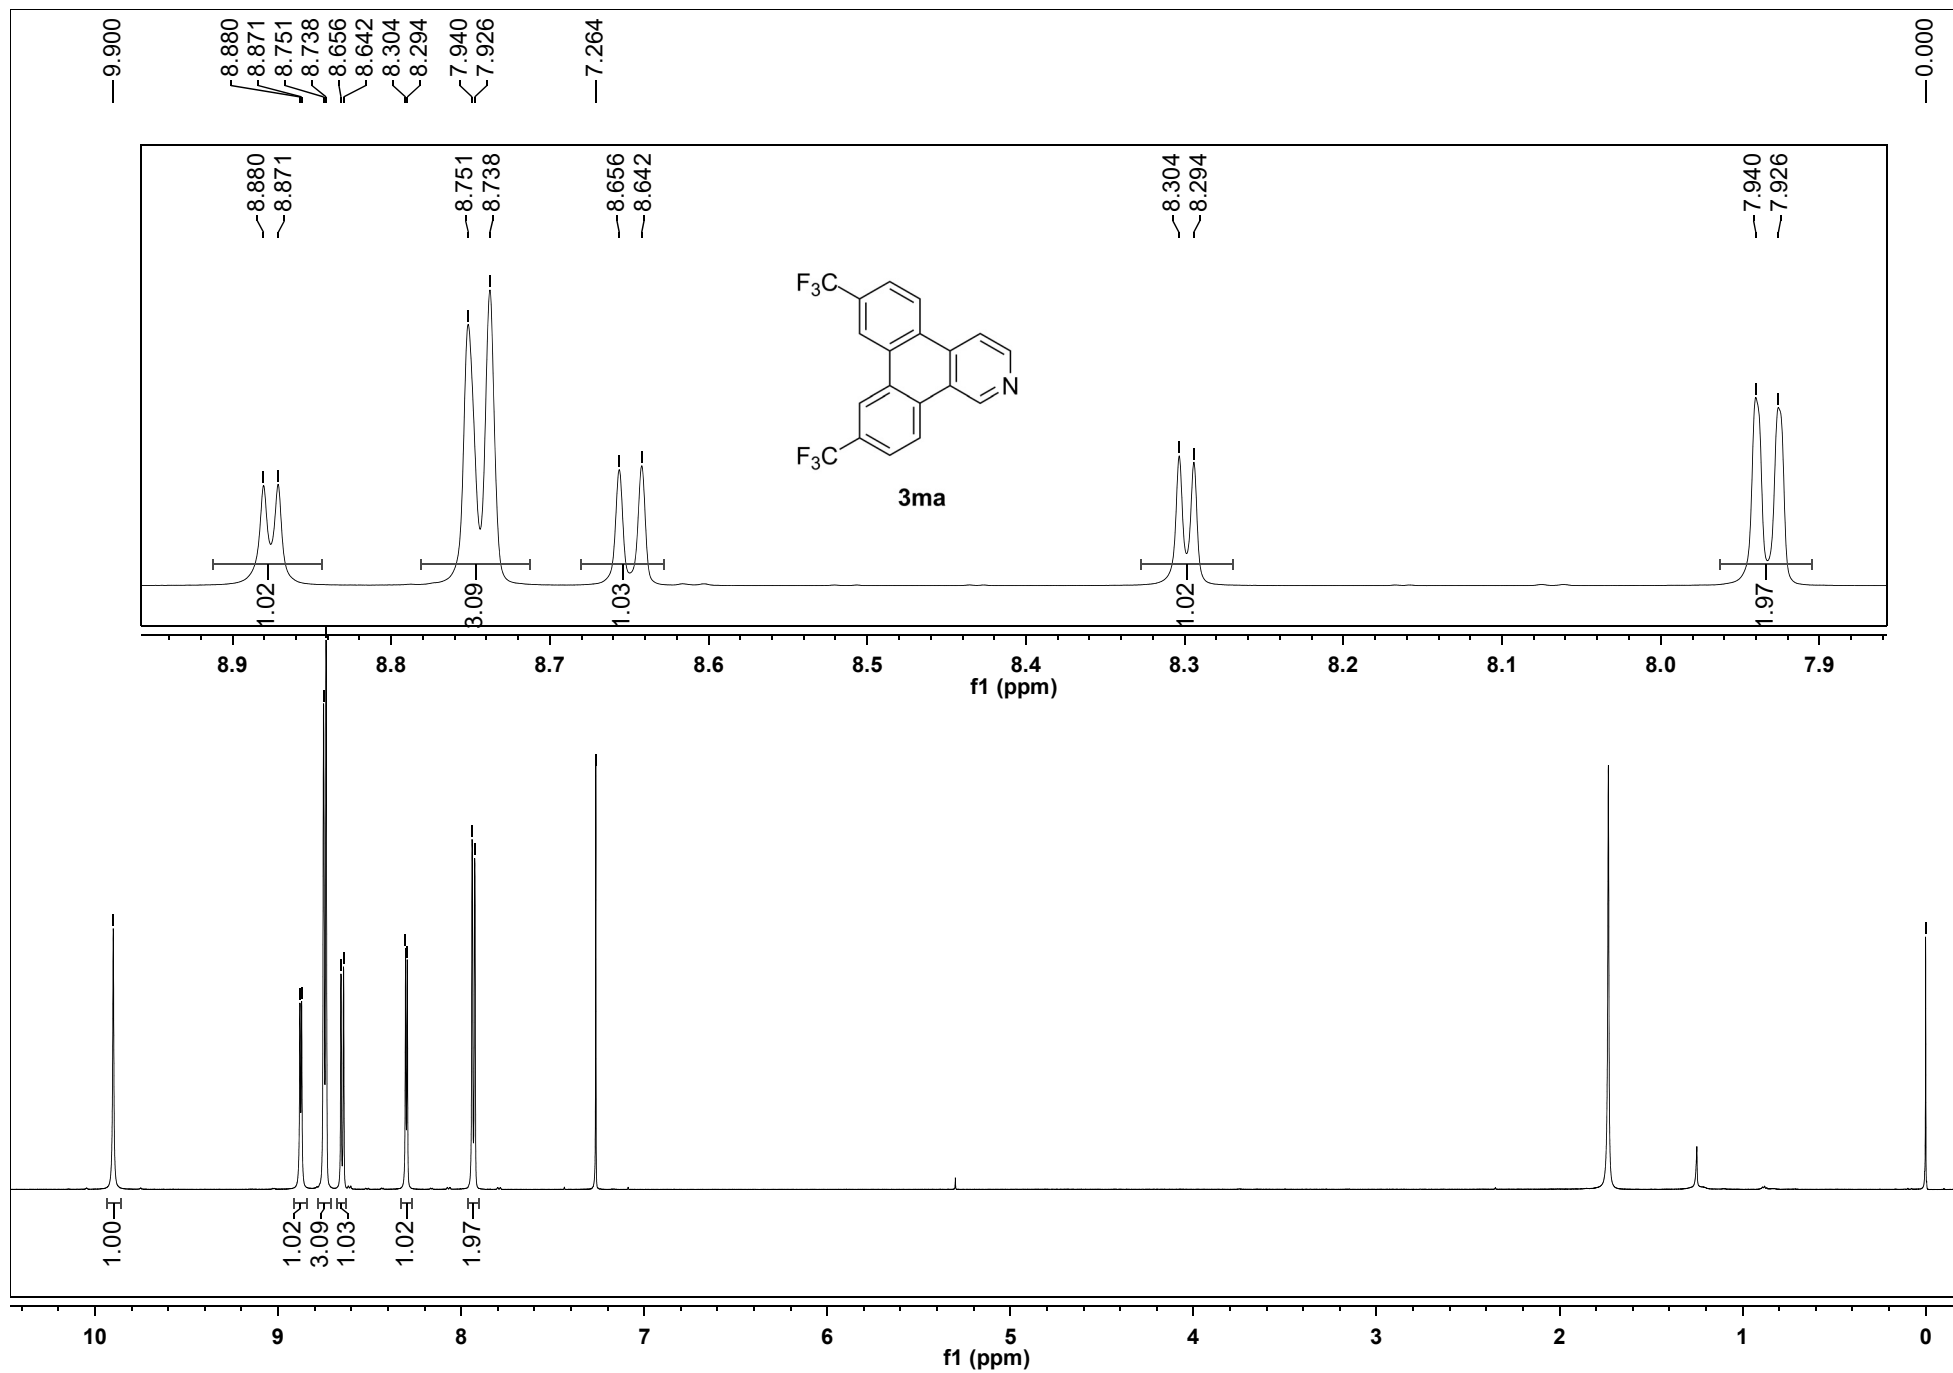



Figure S32.  $^{13}\text{C}\{^1\text{H}\}$  NMR spectrum (150 MHz,  $\text{CDCl}_3$ ) of 3ma

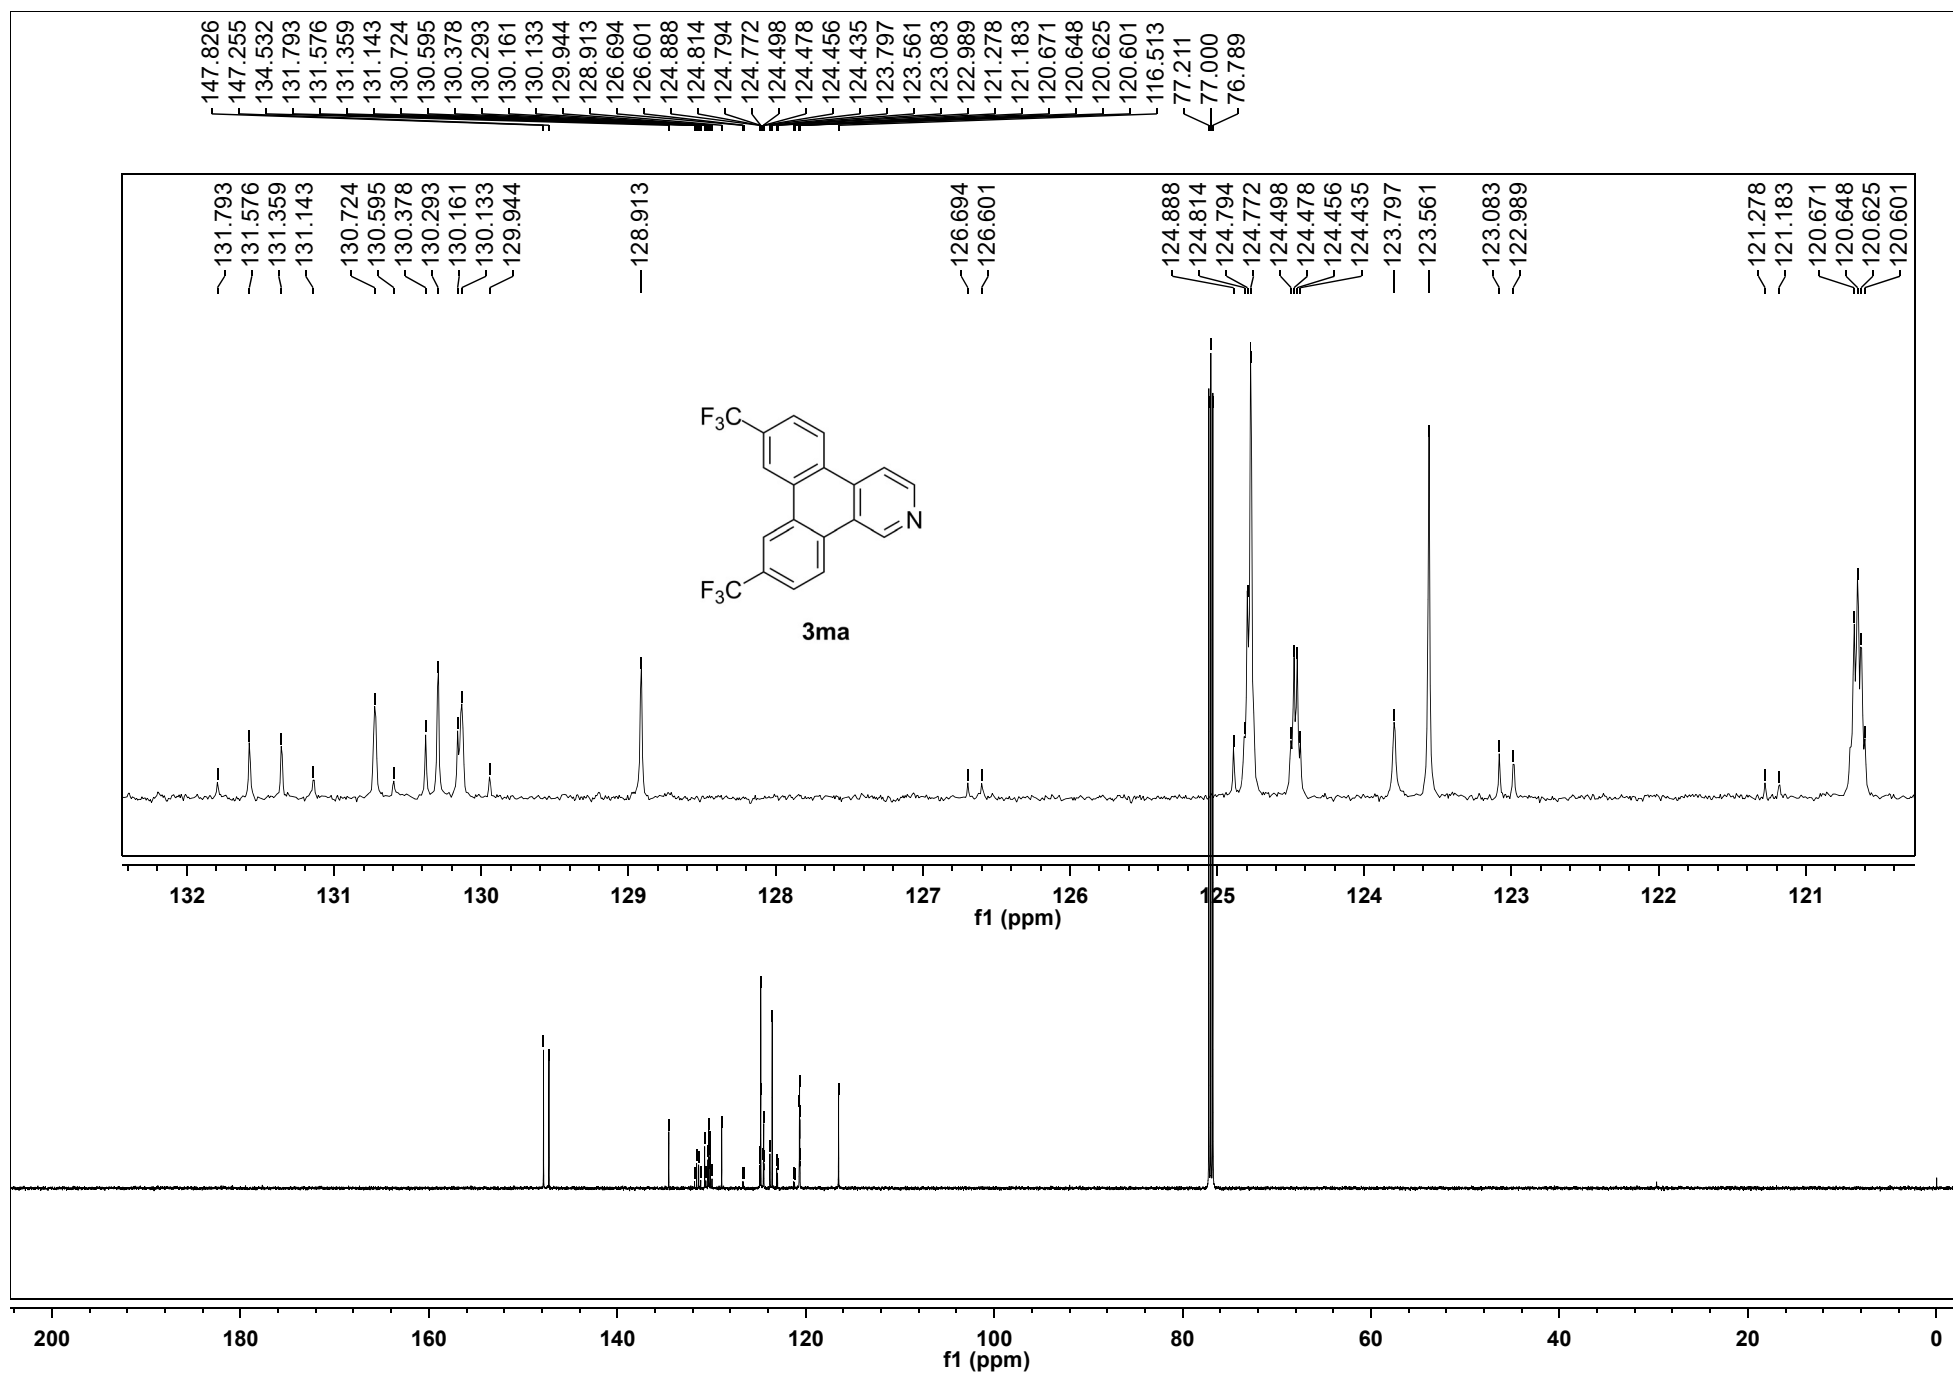

Figure S33. <sup>1</sup>H NMR spectrum (600 MHz, CDCl<sub>3</sub>) of 3na

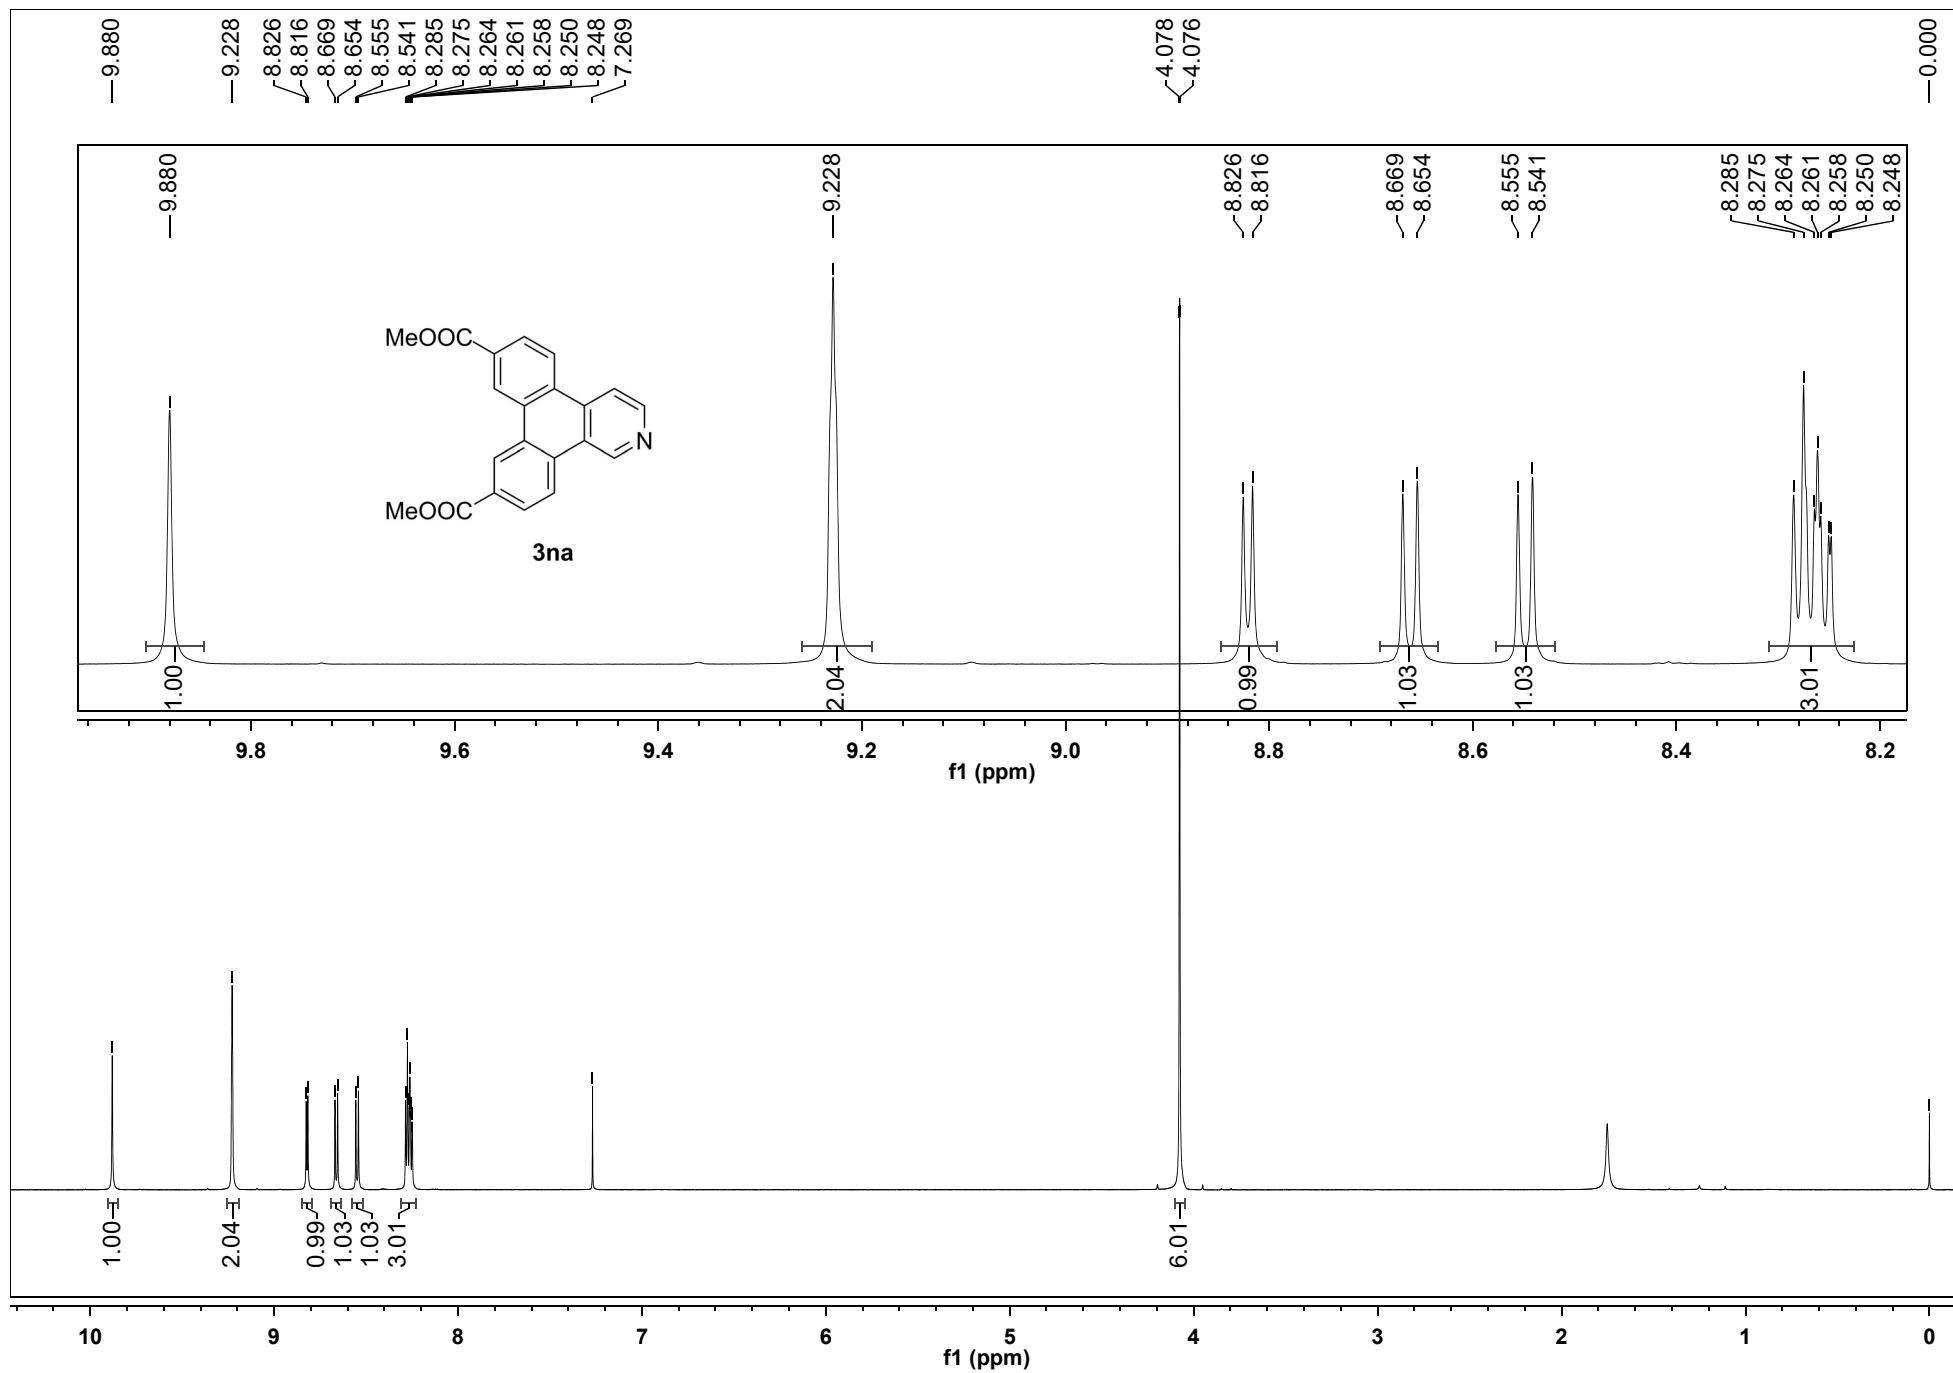

Figure S34.  $^{13}\text{C}\{^1\text{H}\}$  NMR spectrum (150 MHz,  $\text{CDCl}_3$ ) of 3na

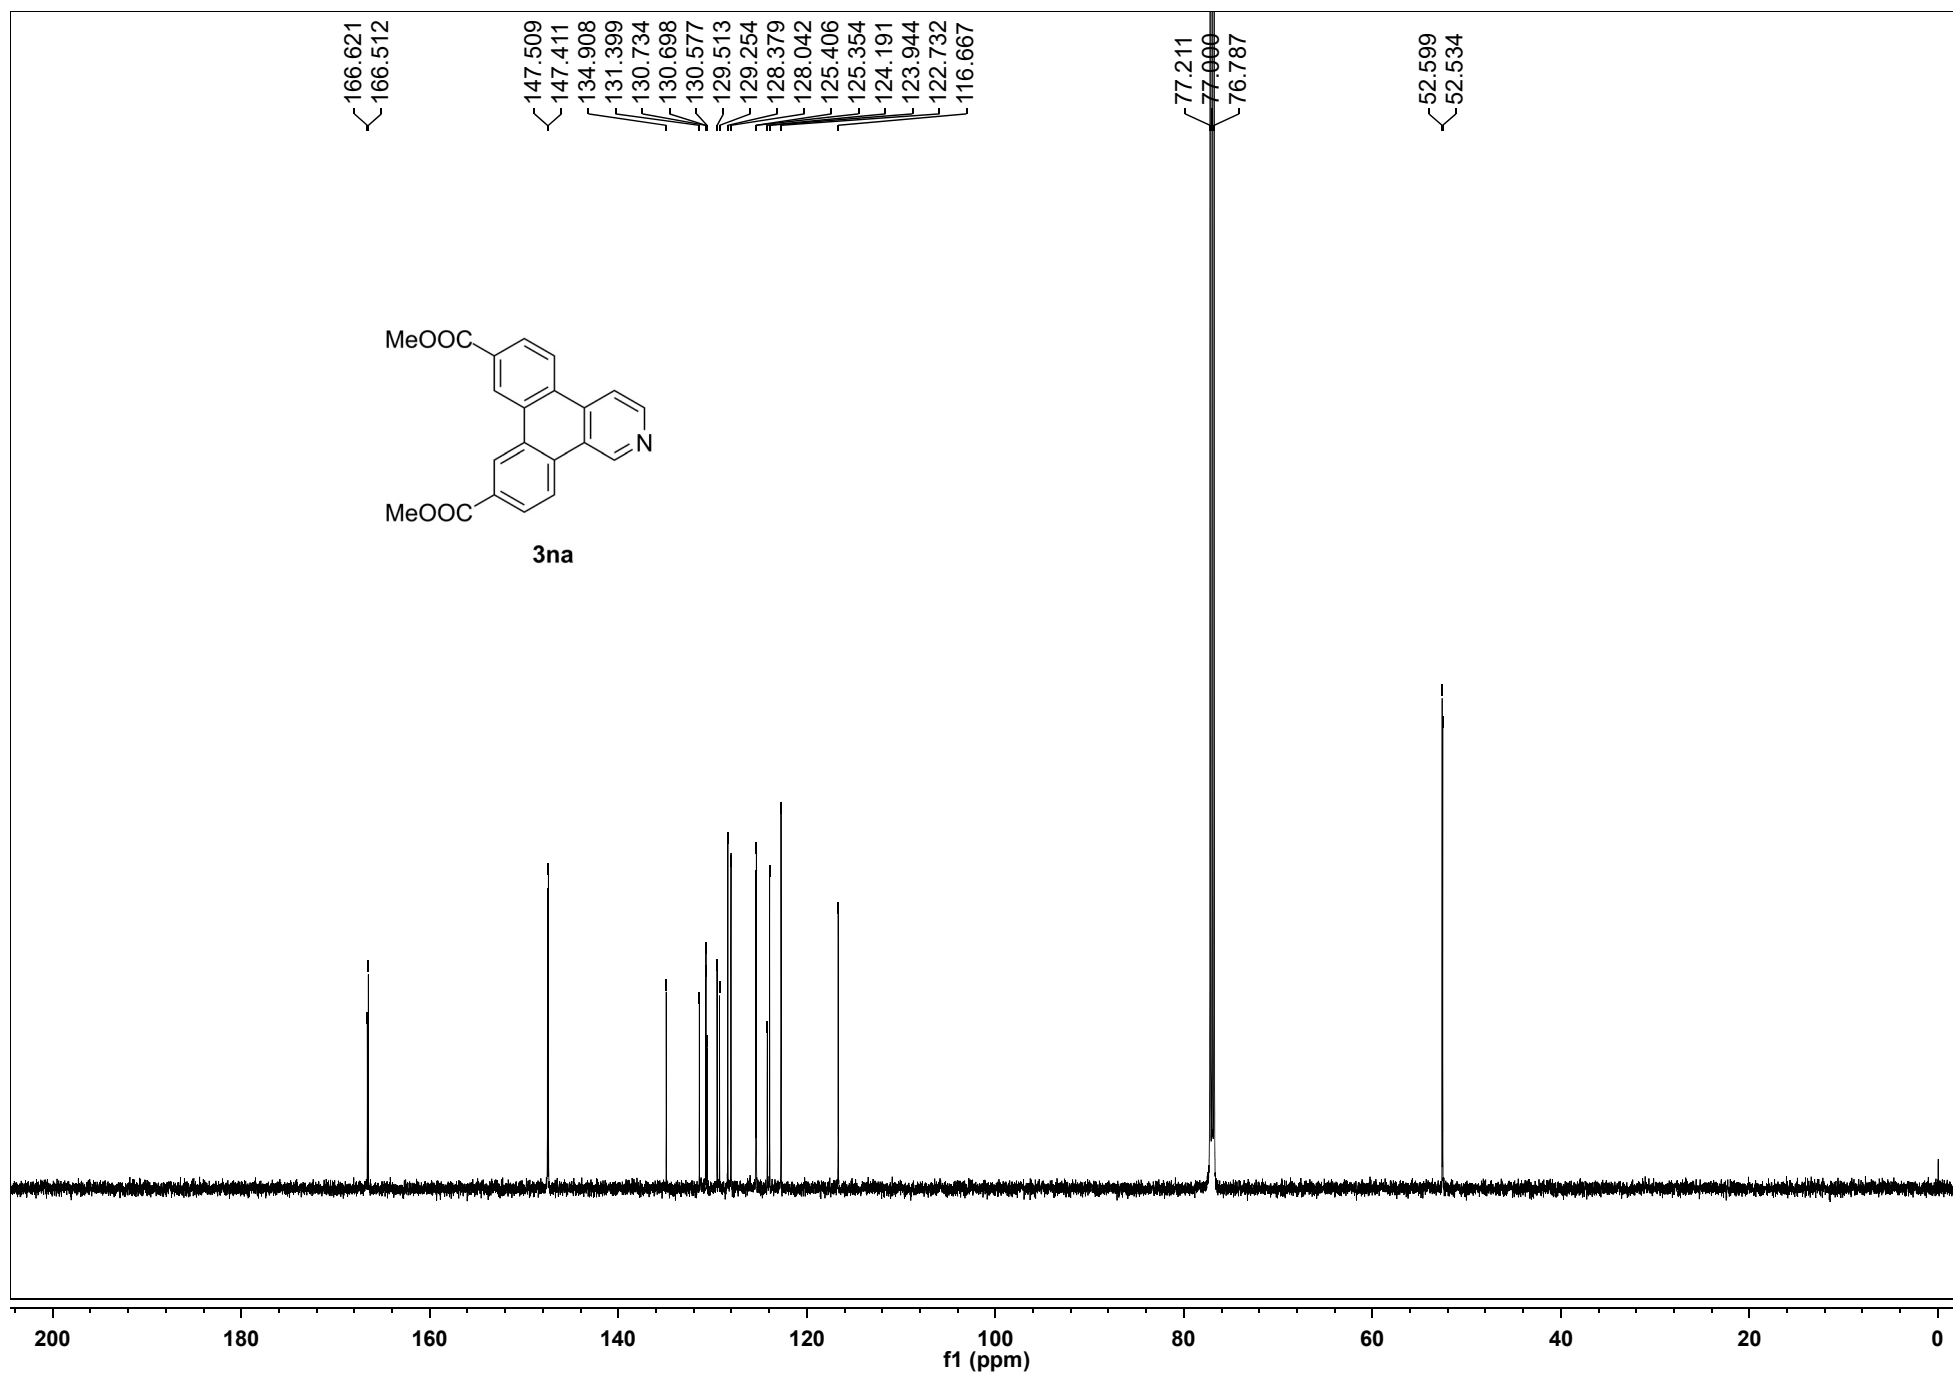

Figure S35. <sup>1</sup>H NMR spectrum (600 MHz, CDCl<sub>3</sub>) of 3oa

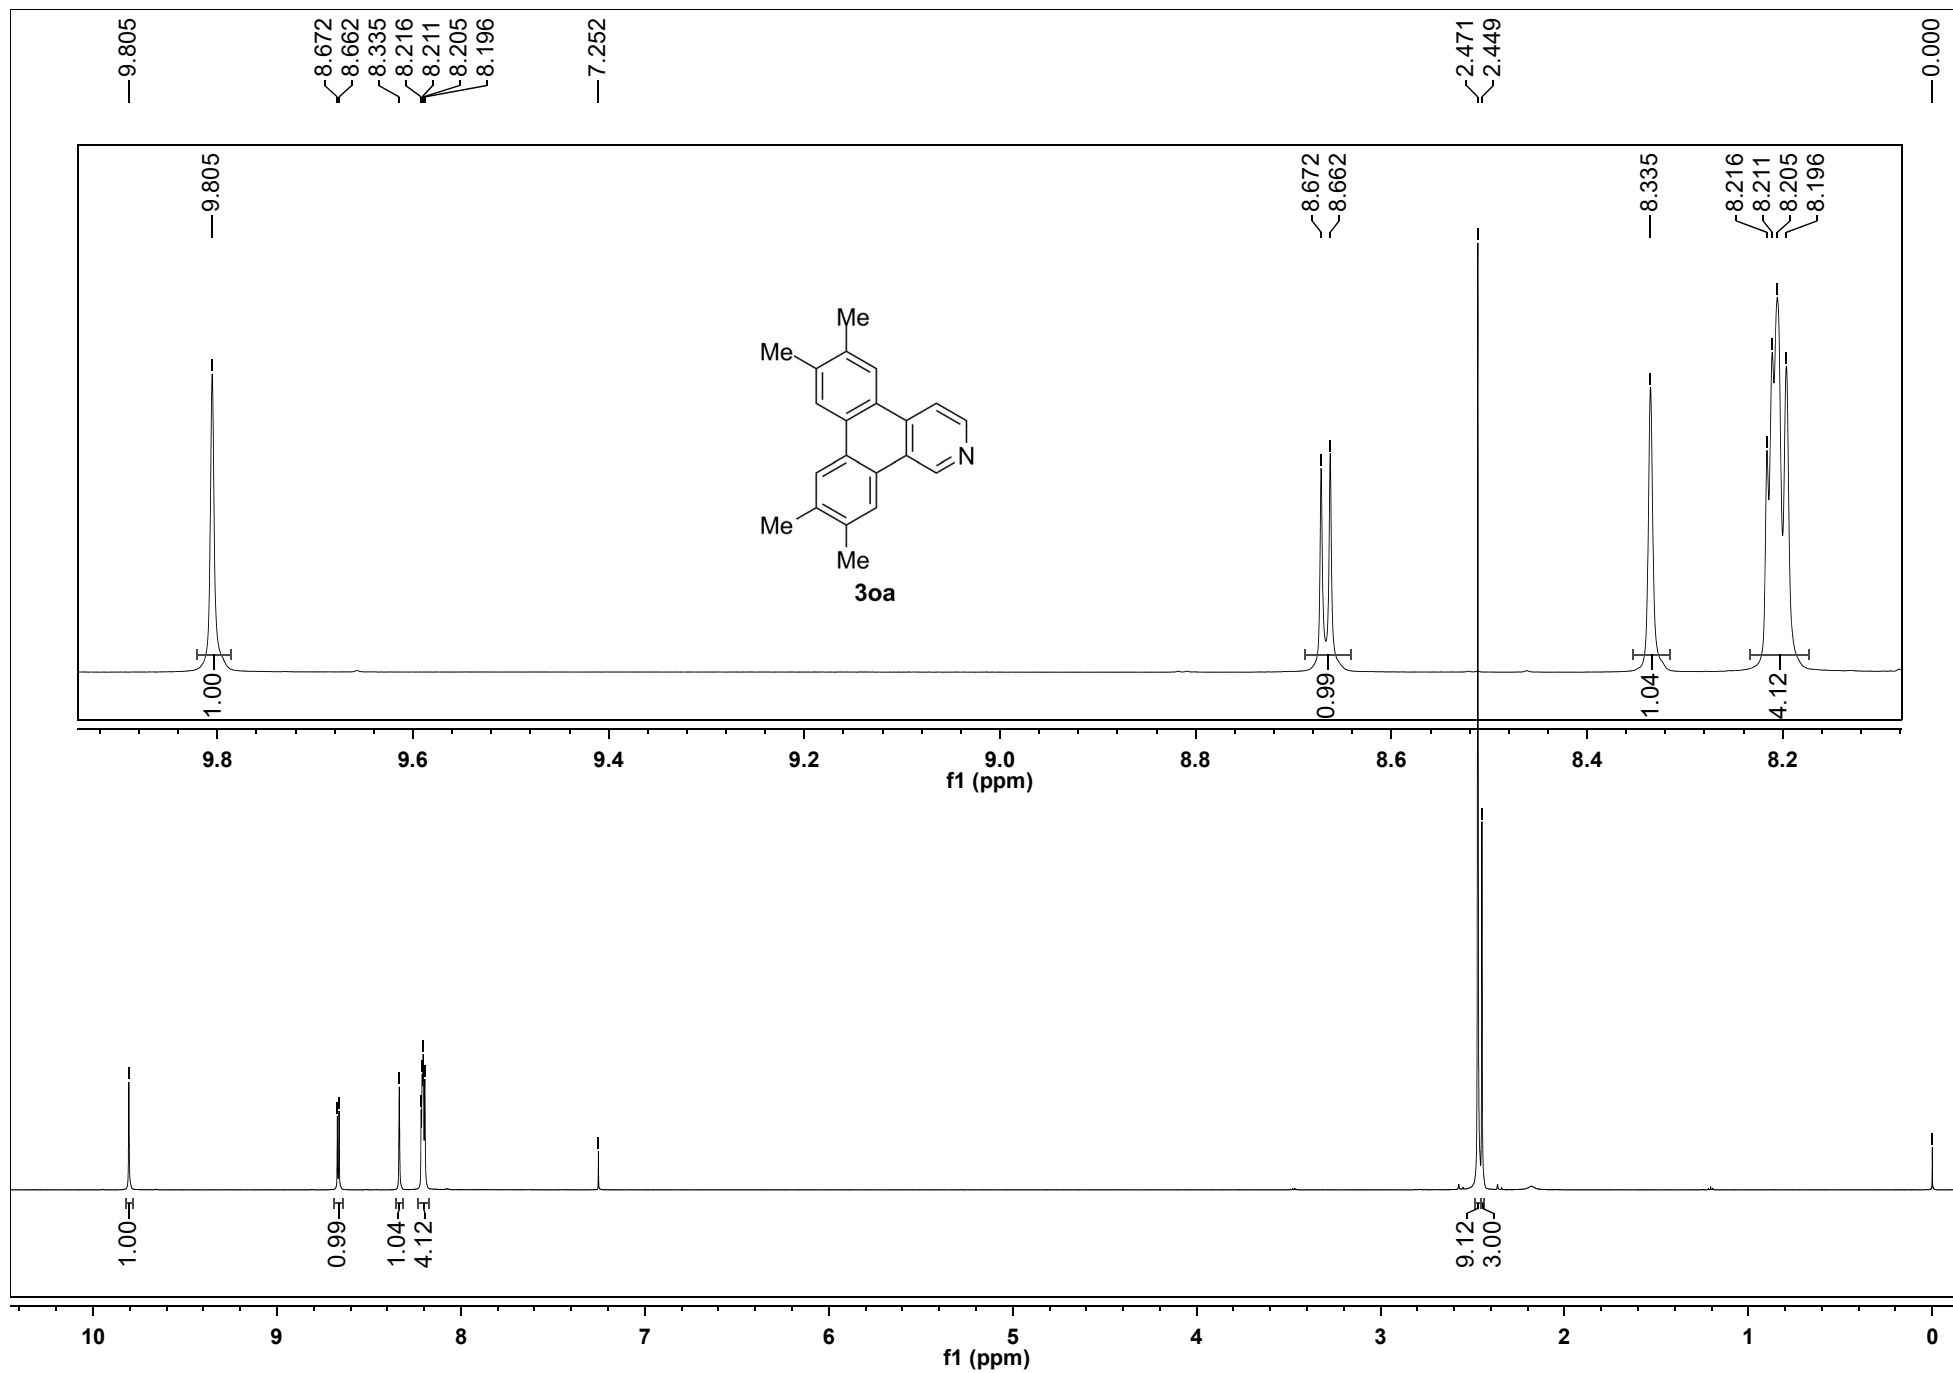

Figure S36.  $^{13}\text{C}\{^1\text{H}\}$  NMR spectrum (150 MHz,  $\text{CDCl}_3$ ) of 3oa

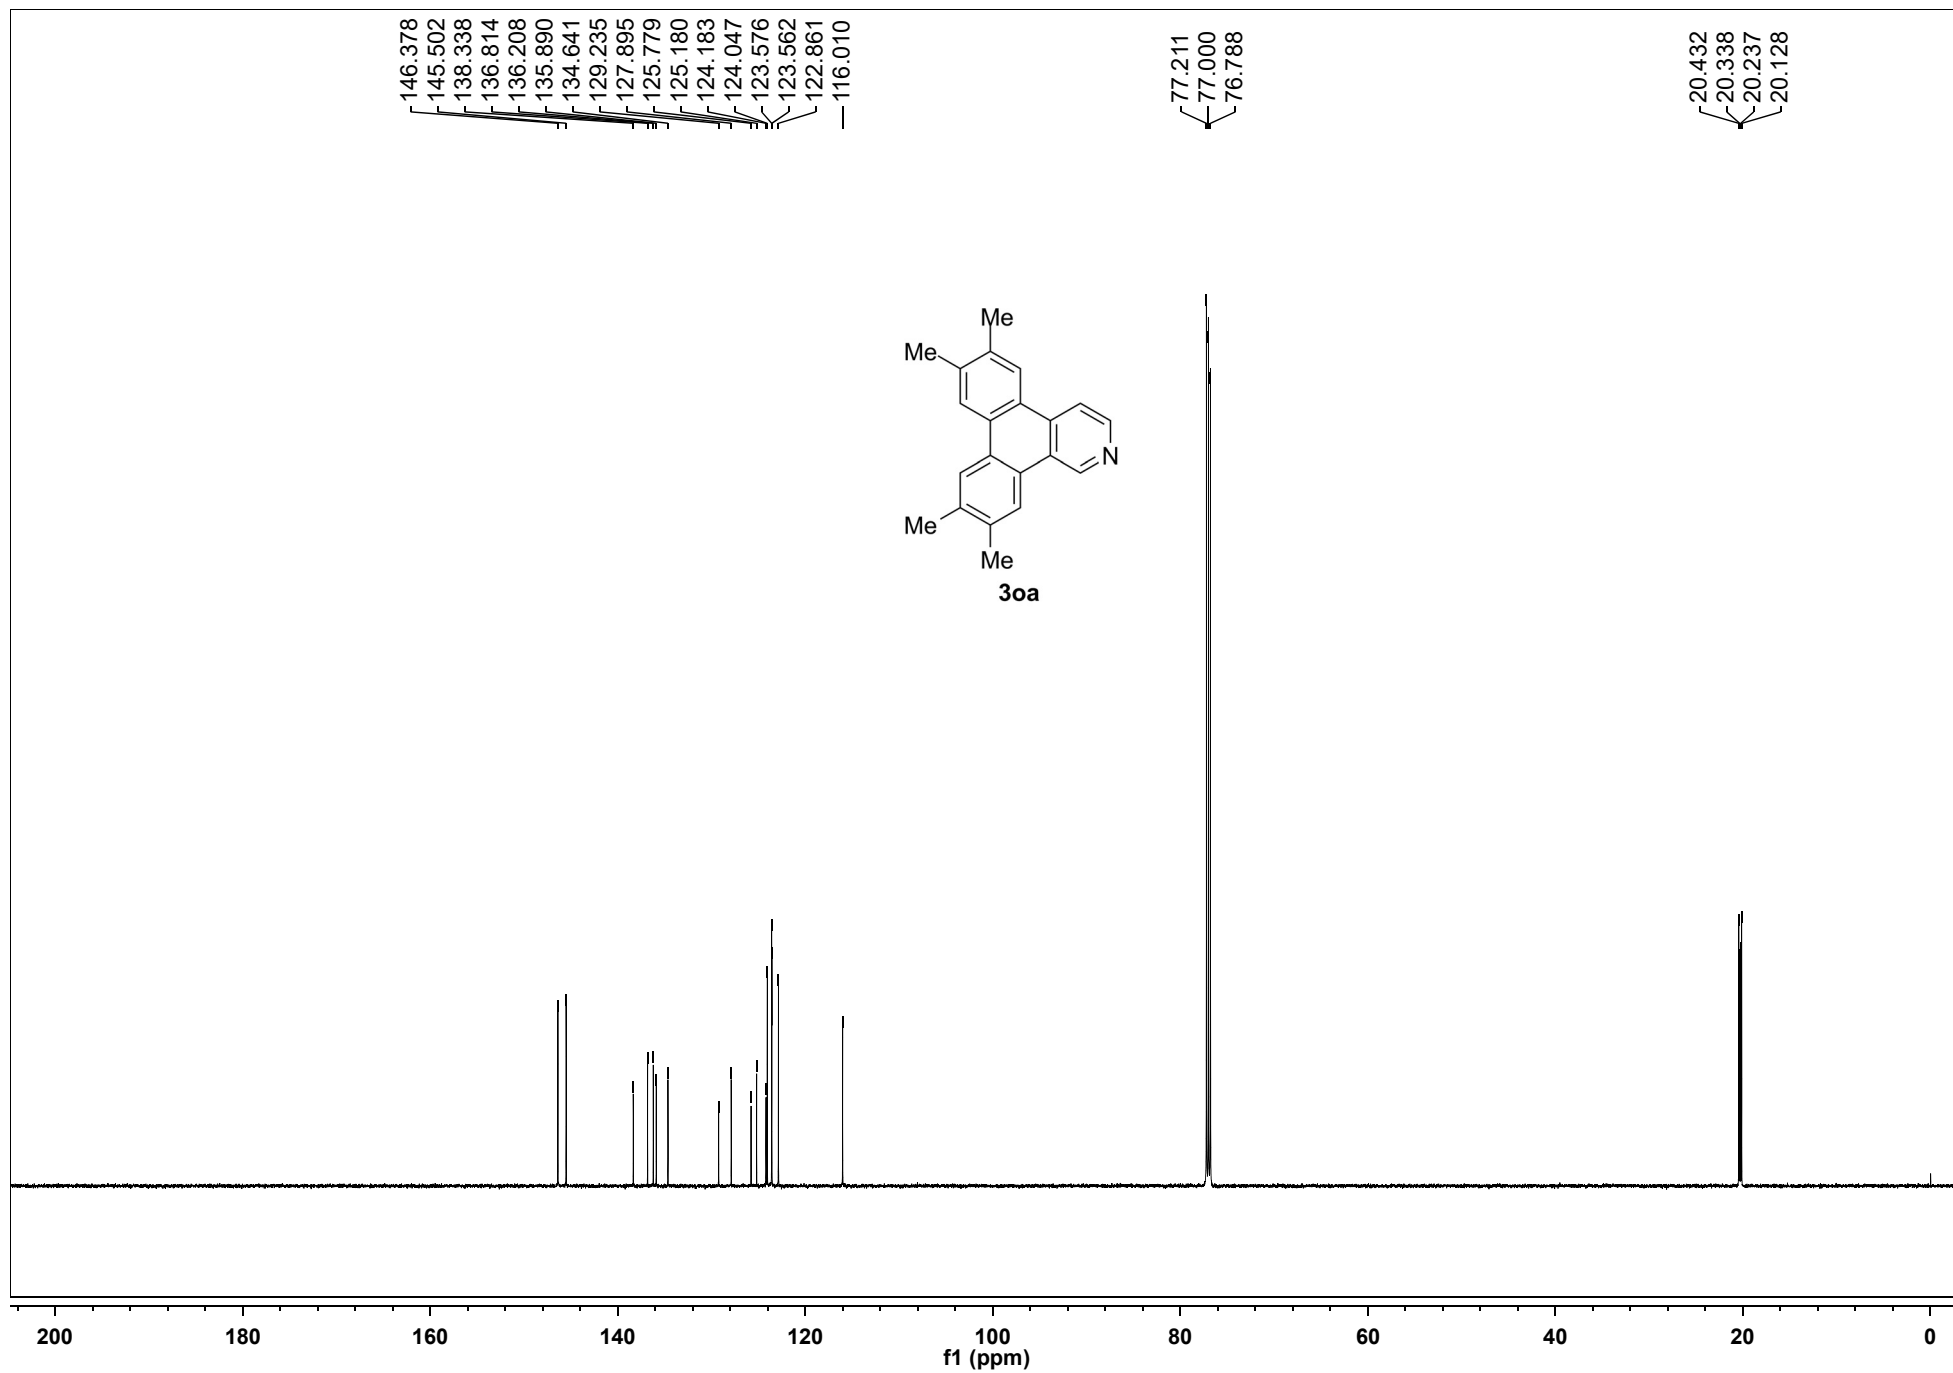

Figure S37. <sup>1</sup>H NMR spectrum (600 MHz, CDCl<sub>3</sub>) of 3pa

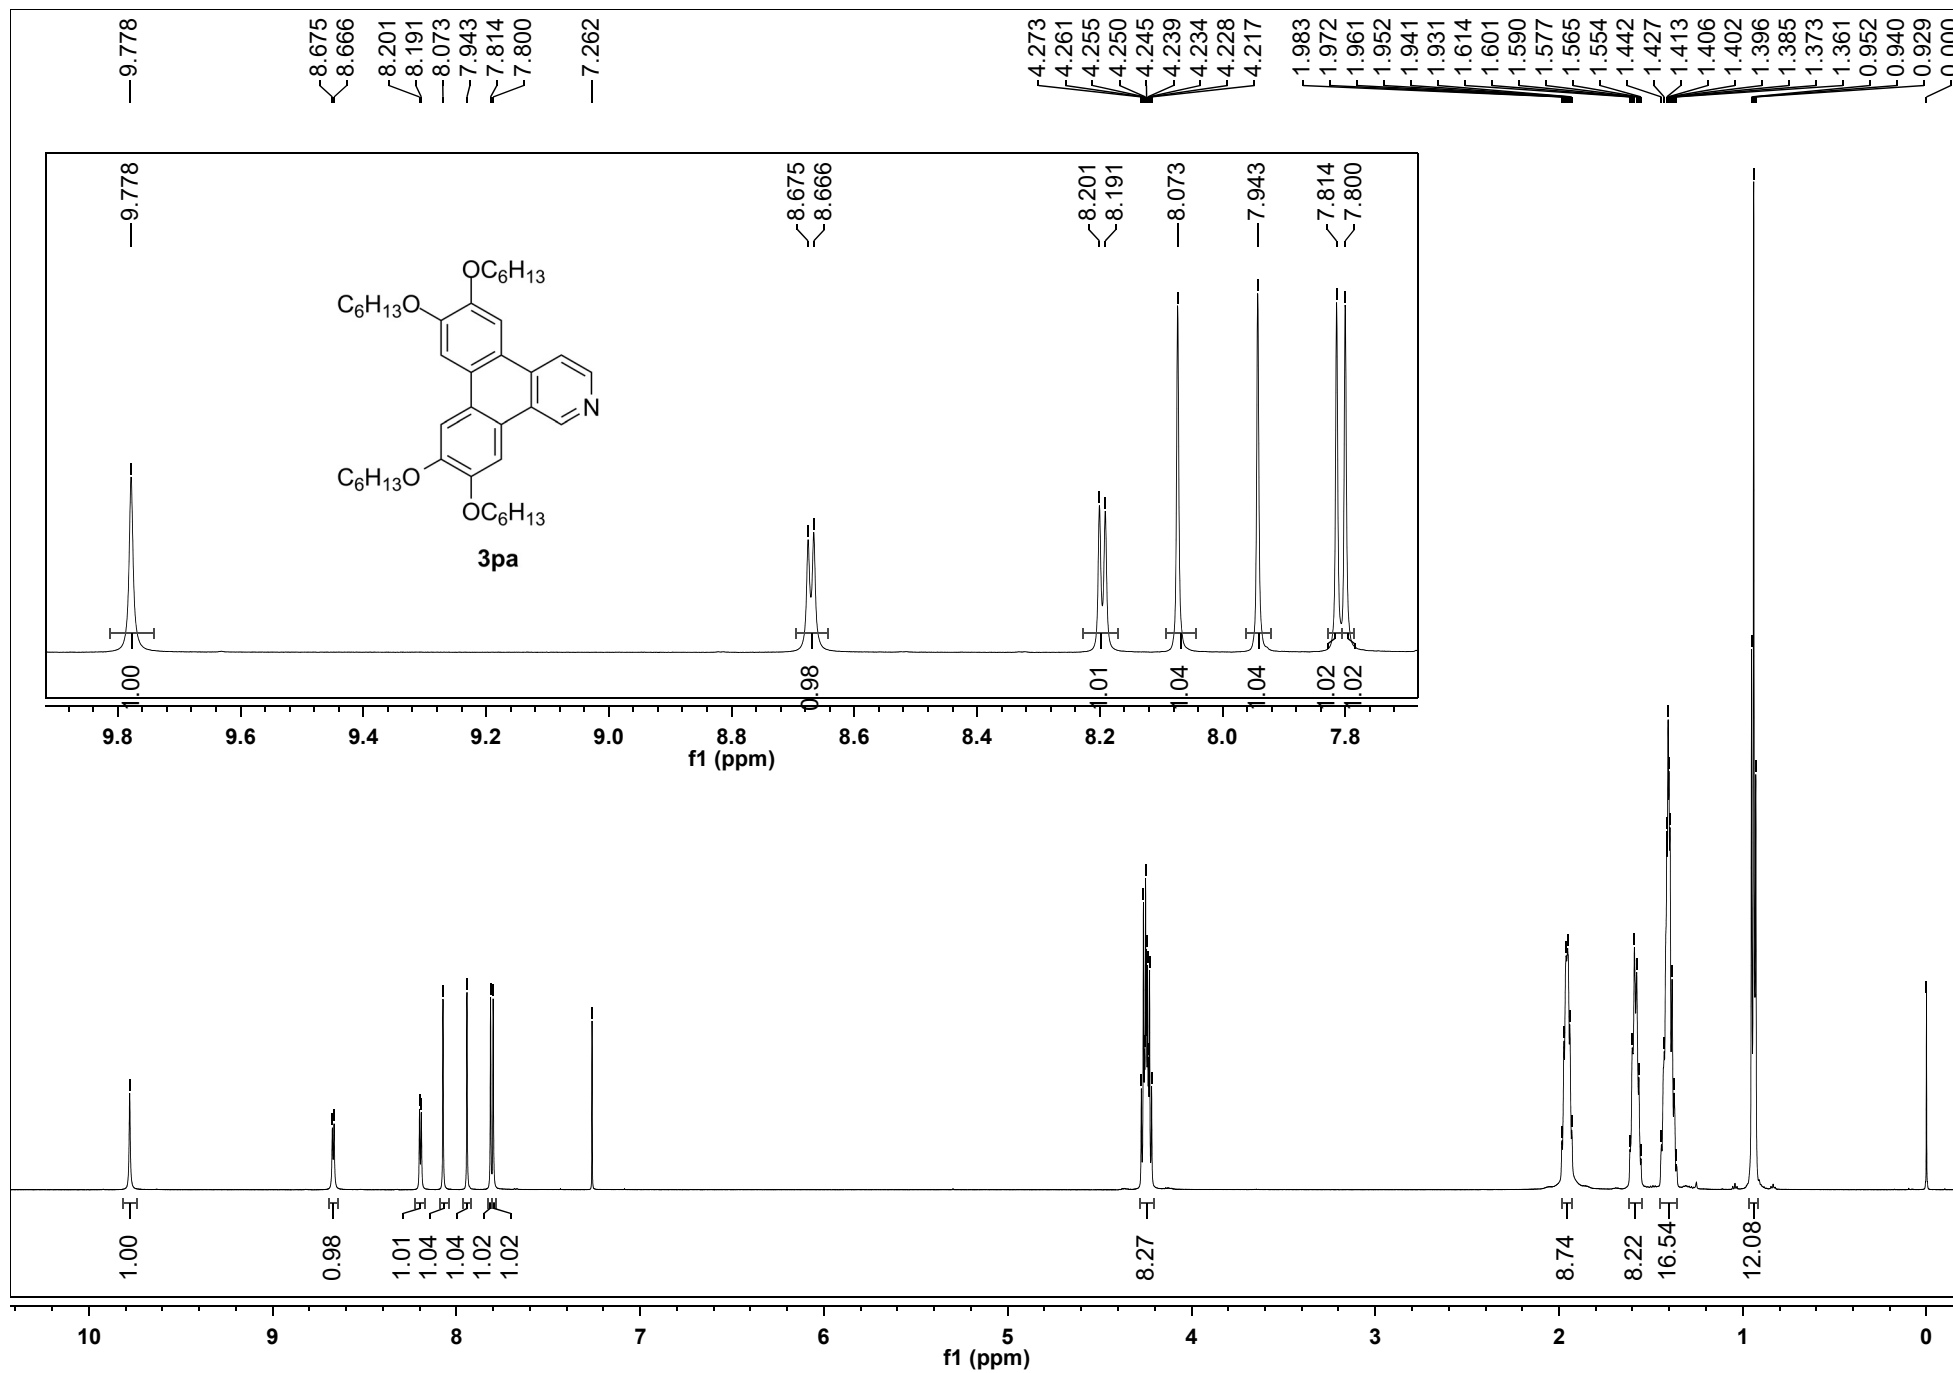

Figure S38.  $^{13}\text{C}\{^1\text{H}\}$  NMR spectrum (150 MHz,  $\text{CDCl}_3$ ) of 3pa

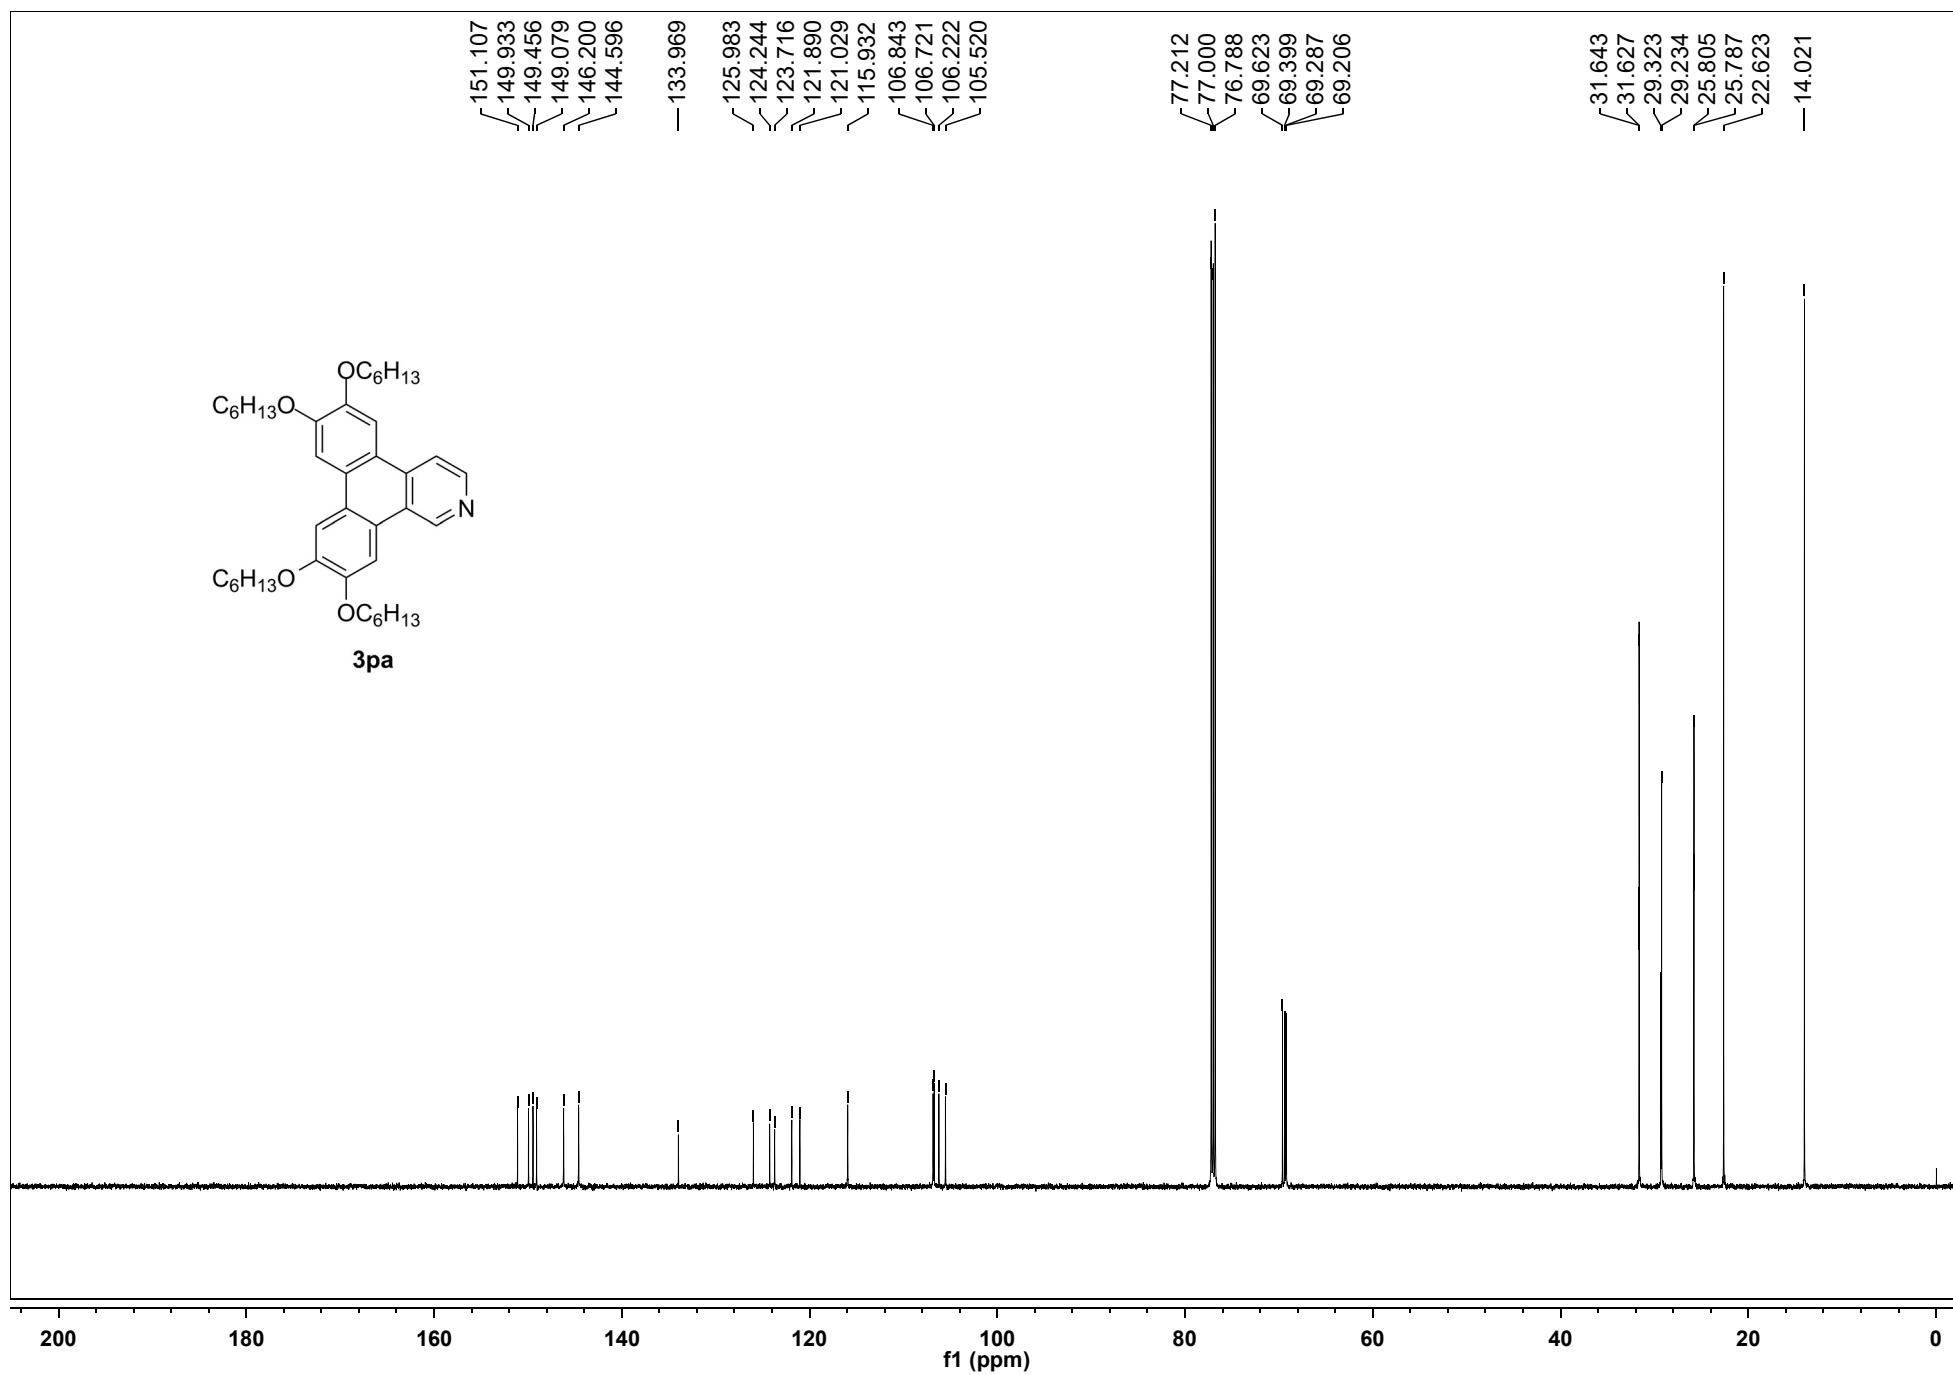

Figure S39. <sup>1</sup>H NMR spectrum (600 MHz, CDCl<sub>3</sub>) of 3ab

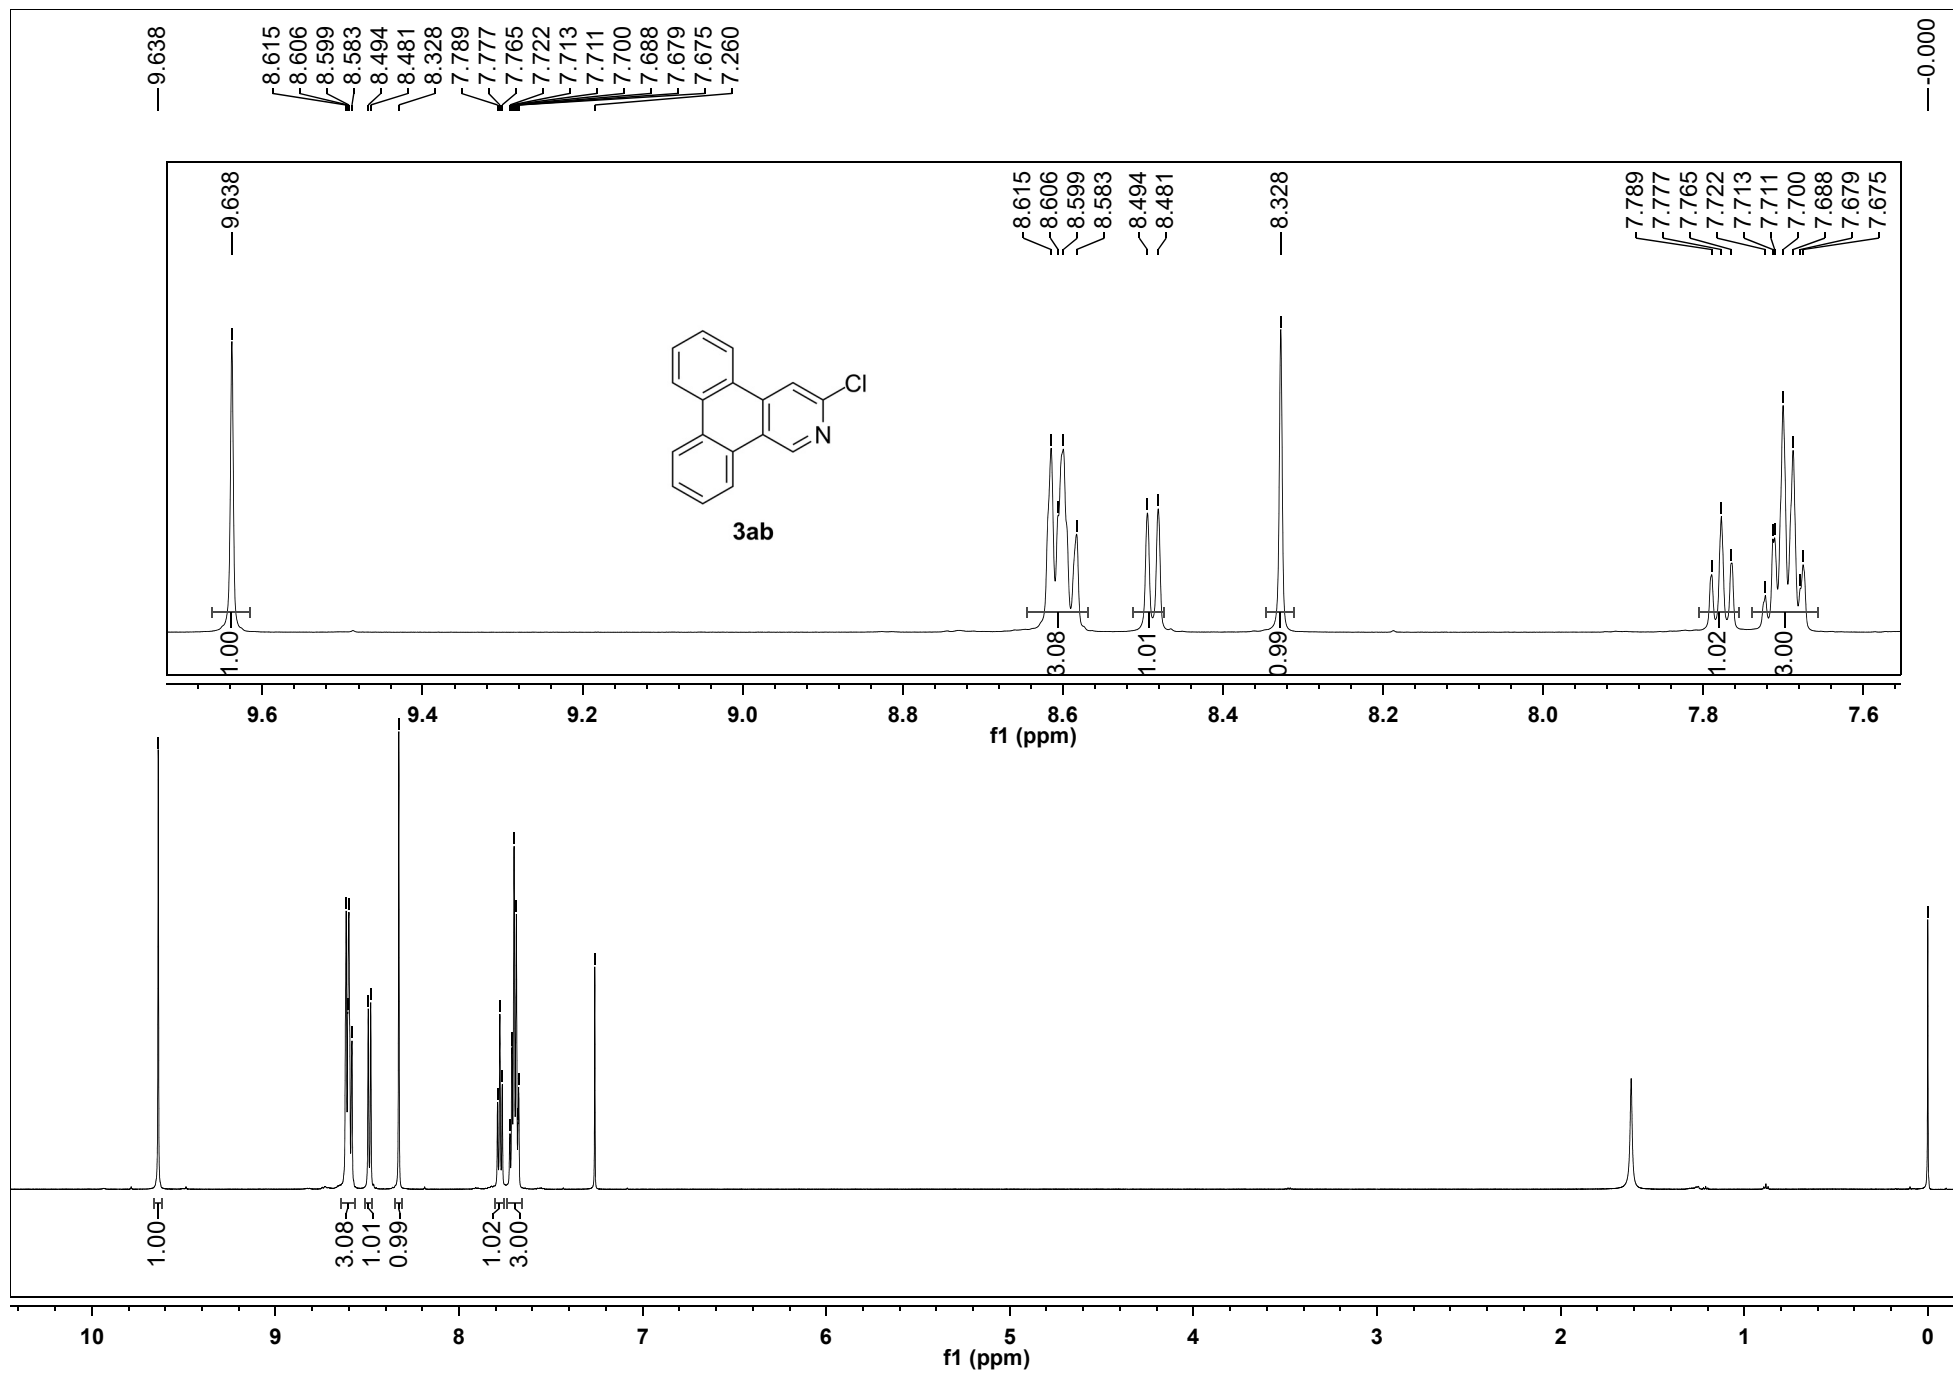



Figure S40.  $^{13}\text{C}\{^1\text{H}\}$  NMR spectrum (150 MHz,  $\text{CDCl}_3$ ) of 3ab

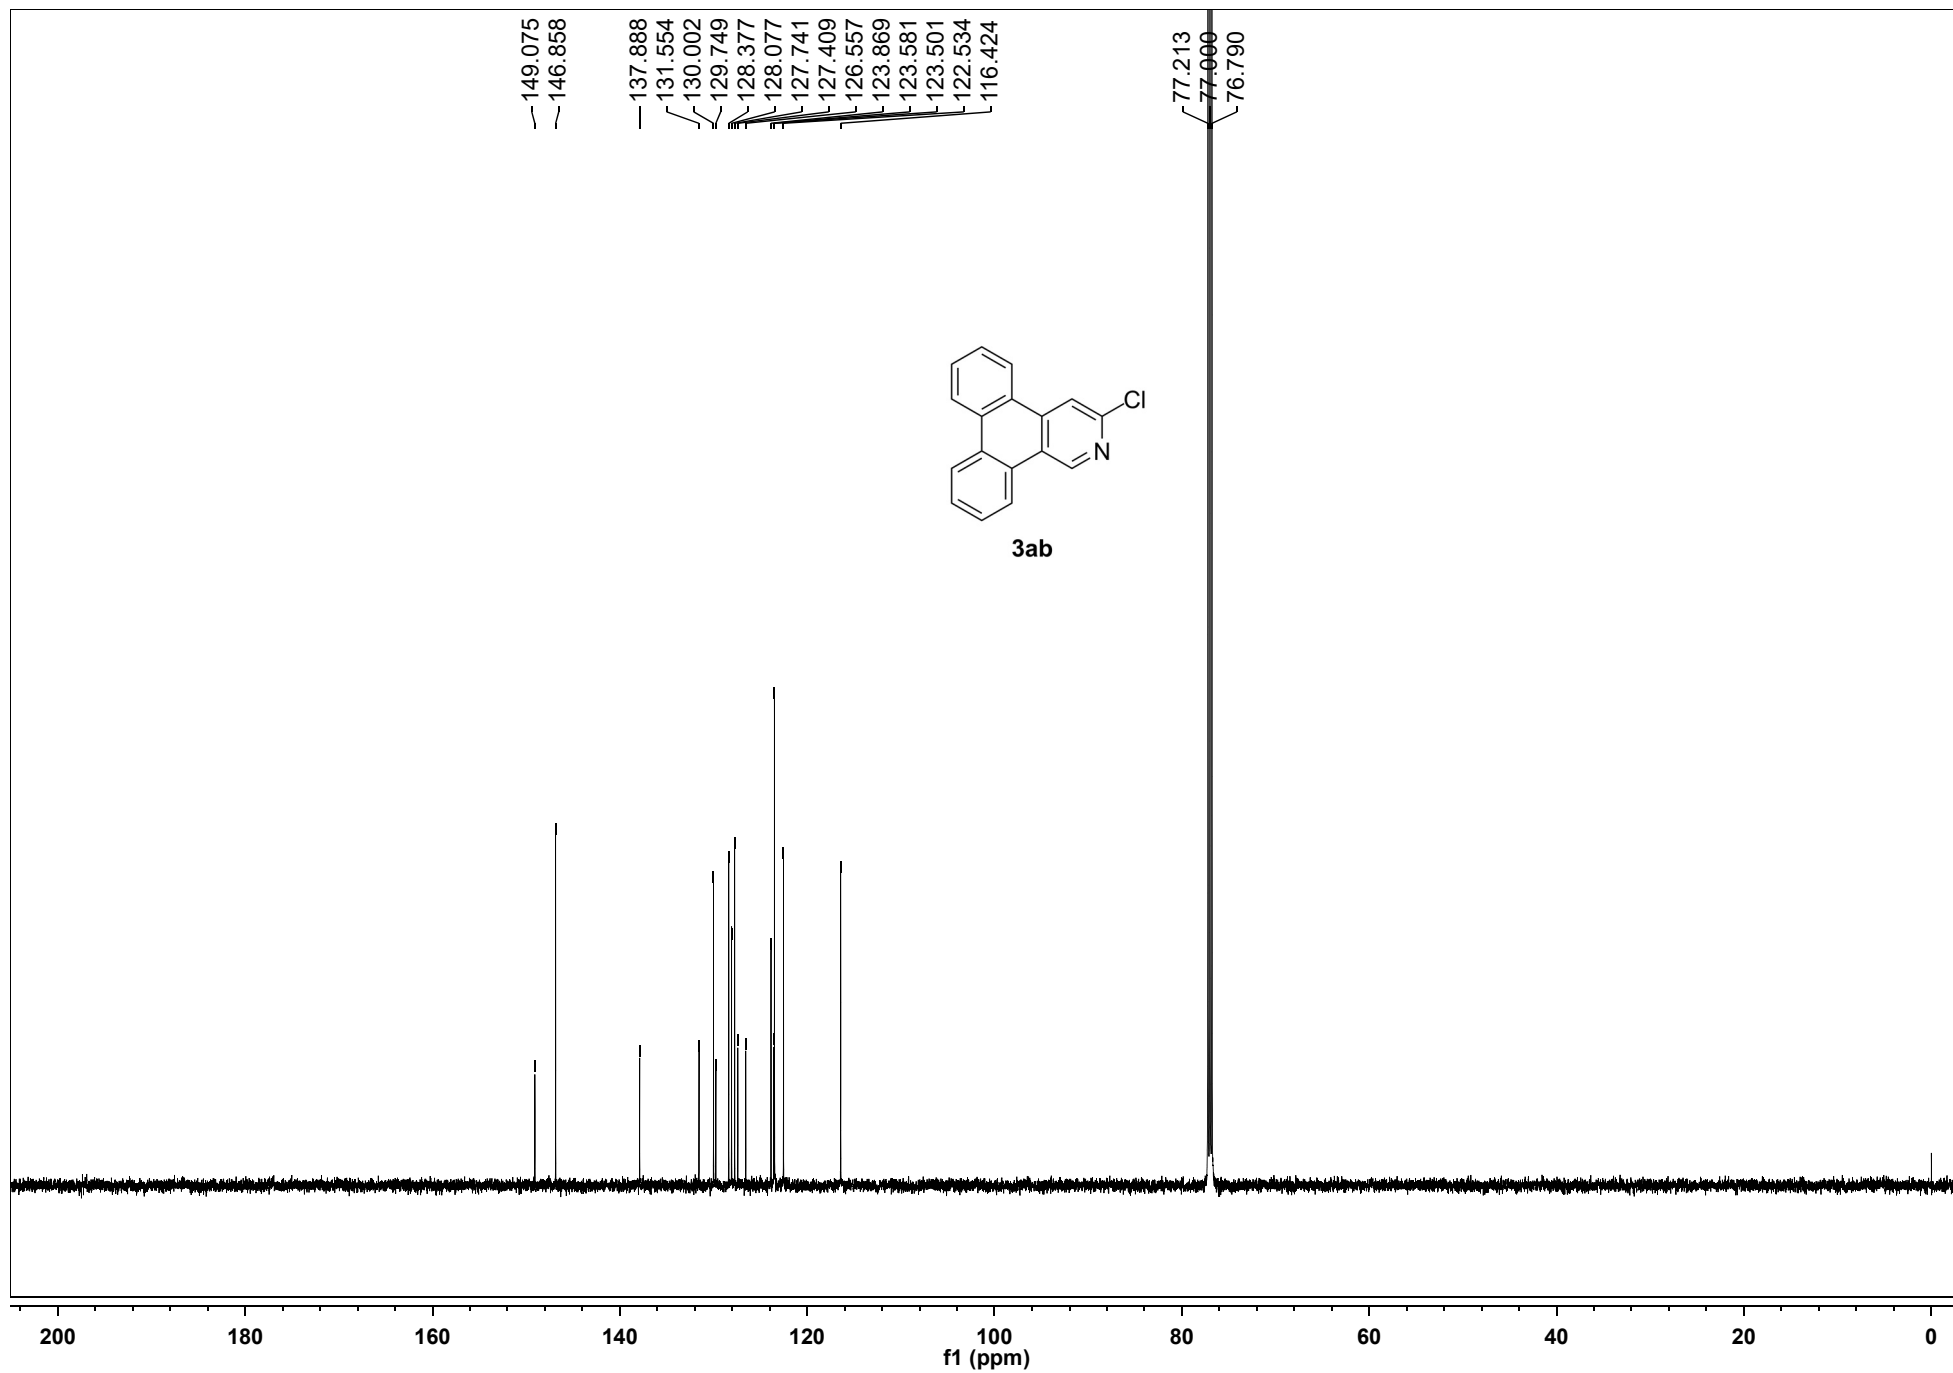

Figure S41. <sup>1</sup>H NMR spectrum (600 MHz, CDCl<sub>3</sub>) of 3ac

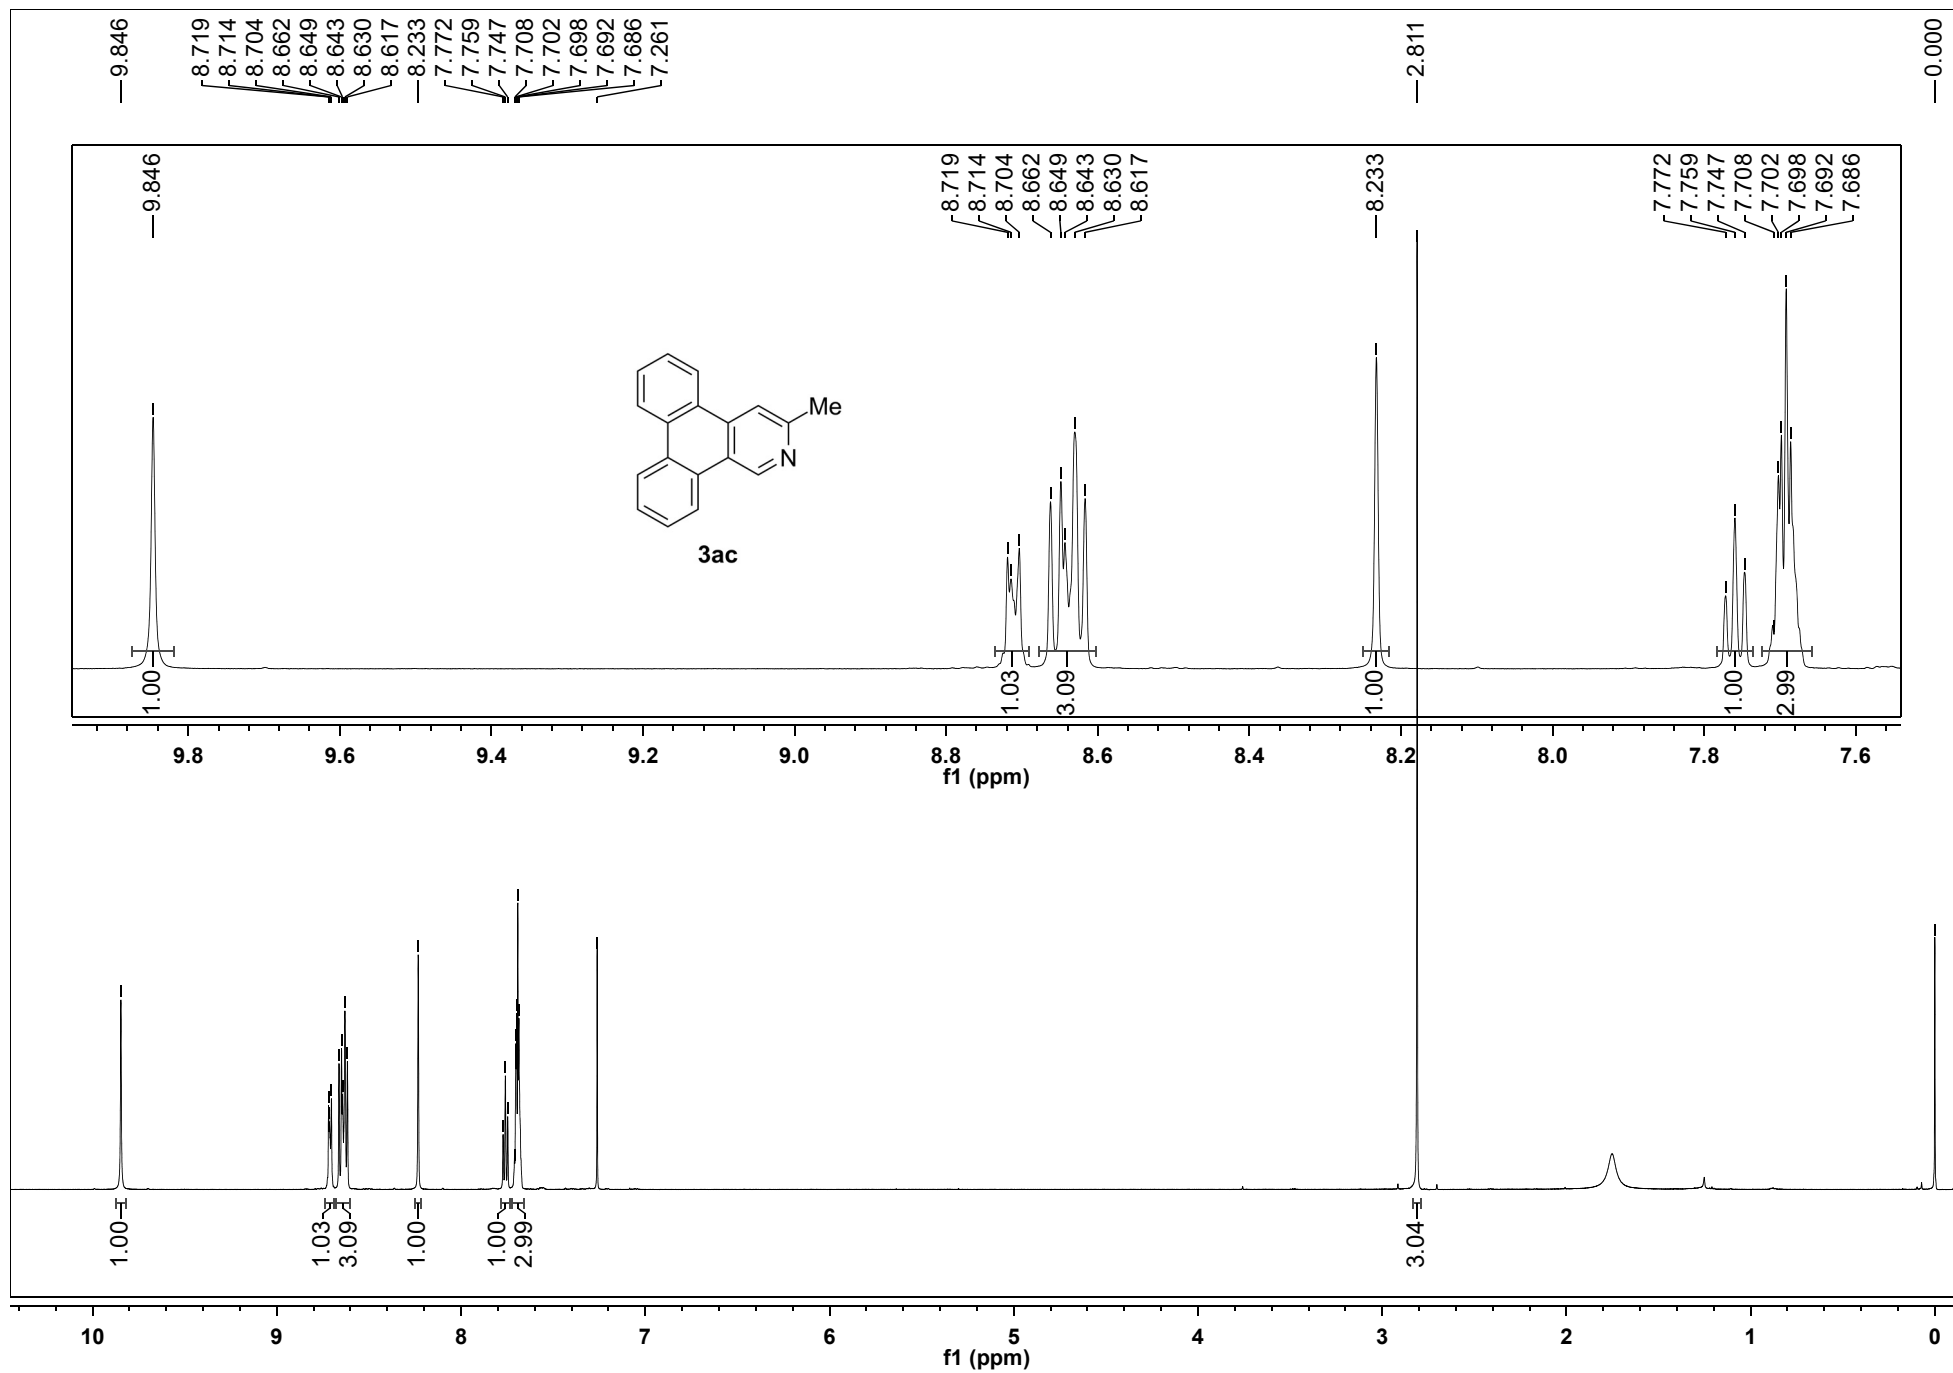

Figure S42.  $^{13}\text{C}\{^1\text{H}\}$  NMR spectrum (150 MHz,  $\text{CDCl}_3$ ) of 3ac

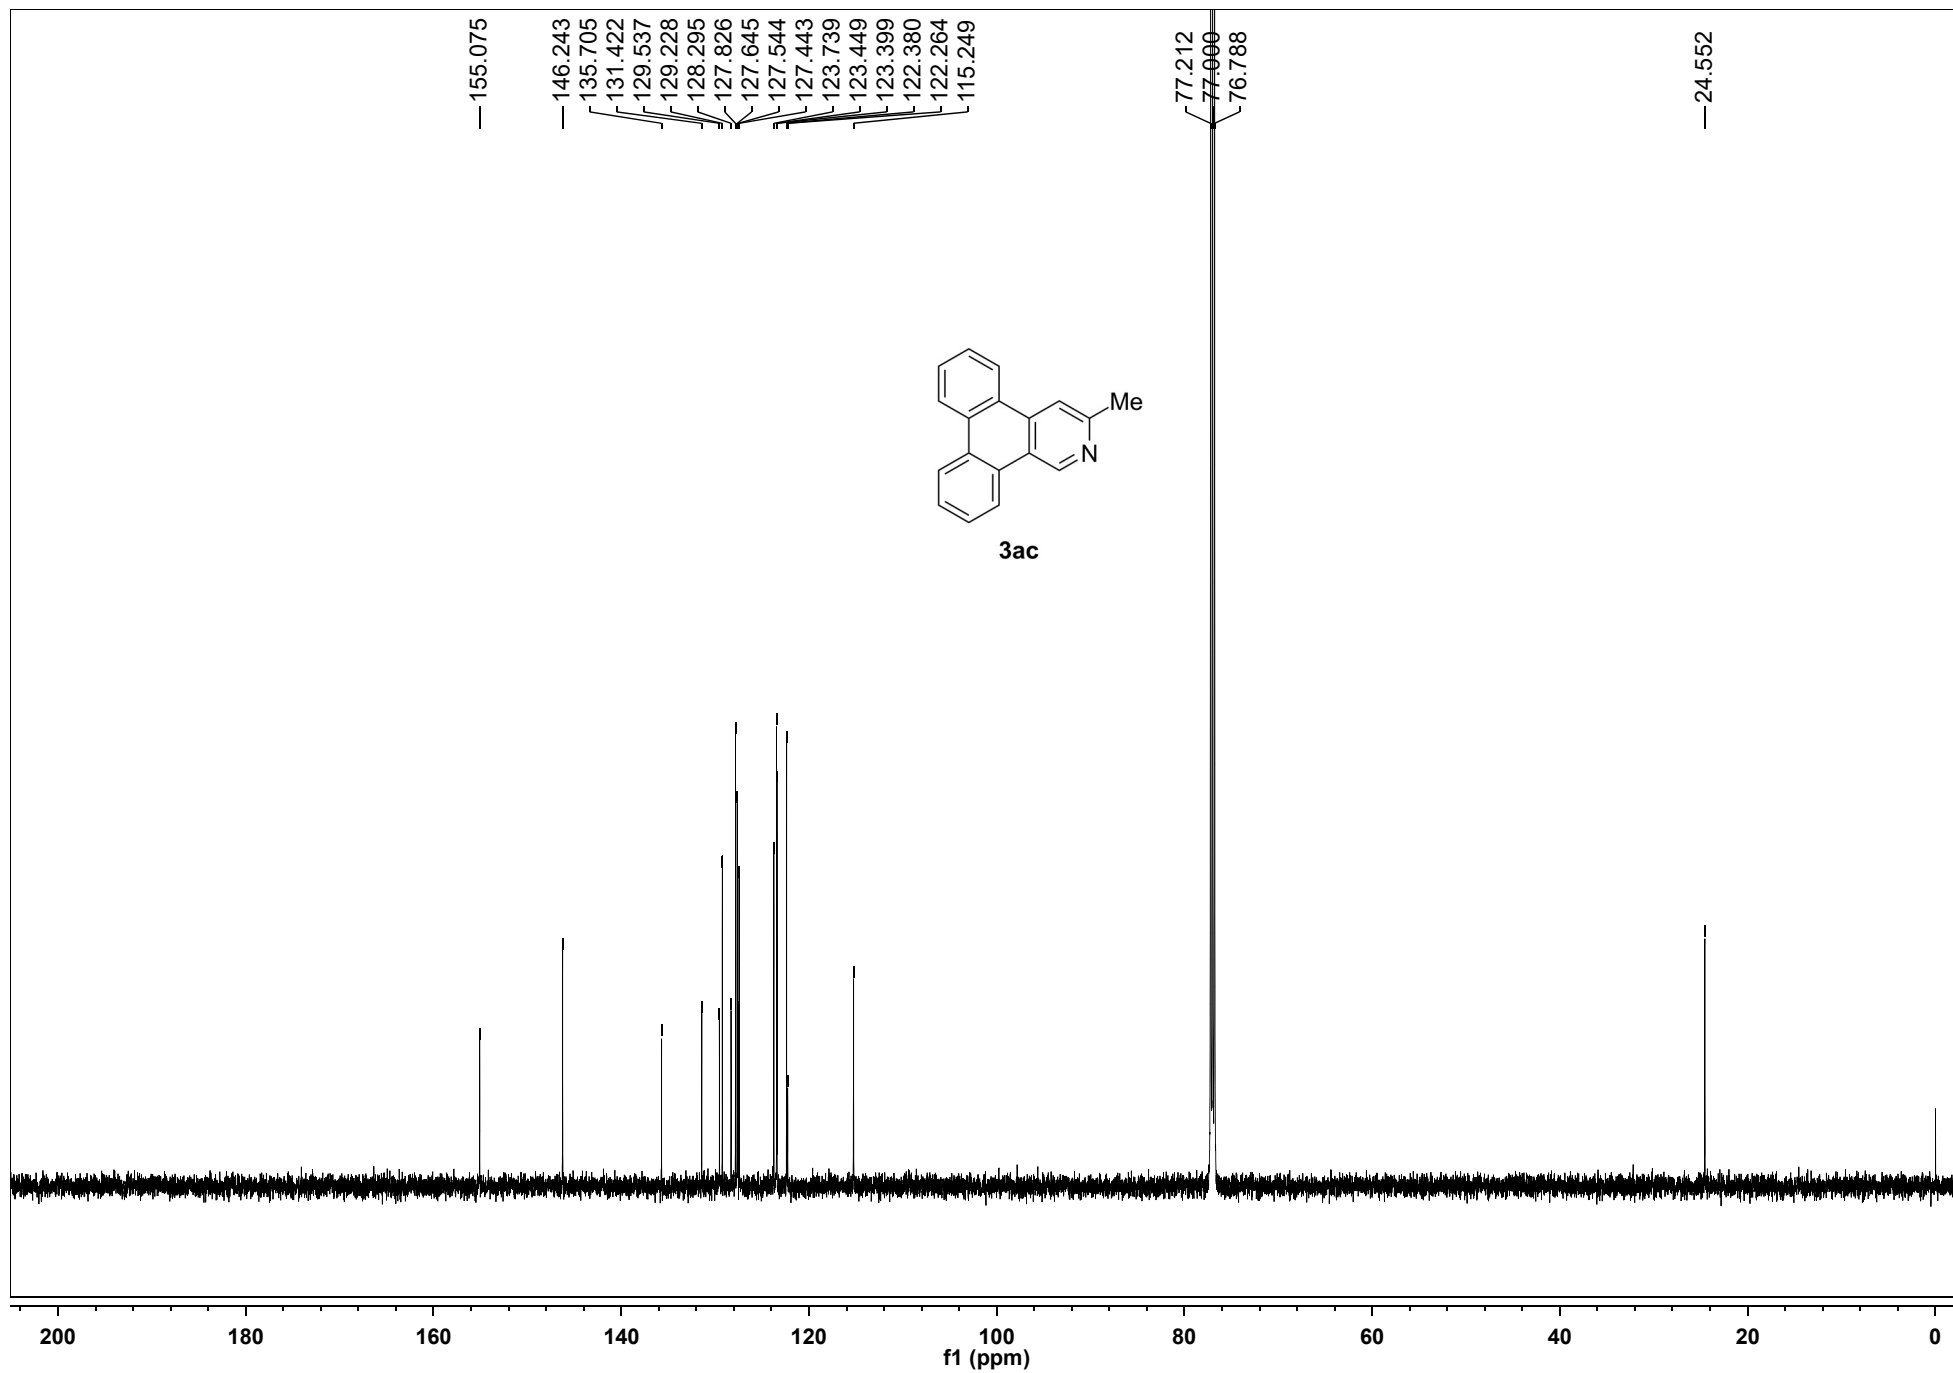

Figure S43. <sup>1</sup>H NMR spectrum (600 MHz, CDCl<sub>3</sub>) of 3ad

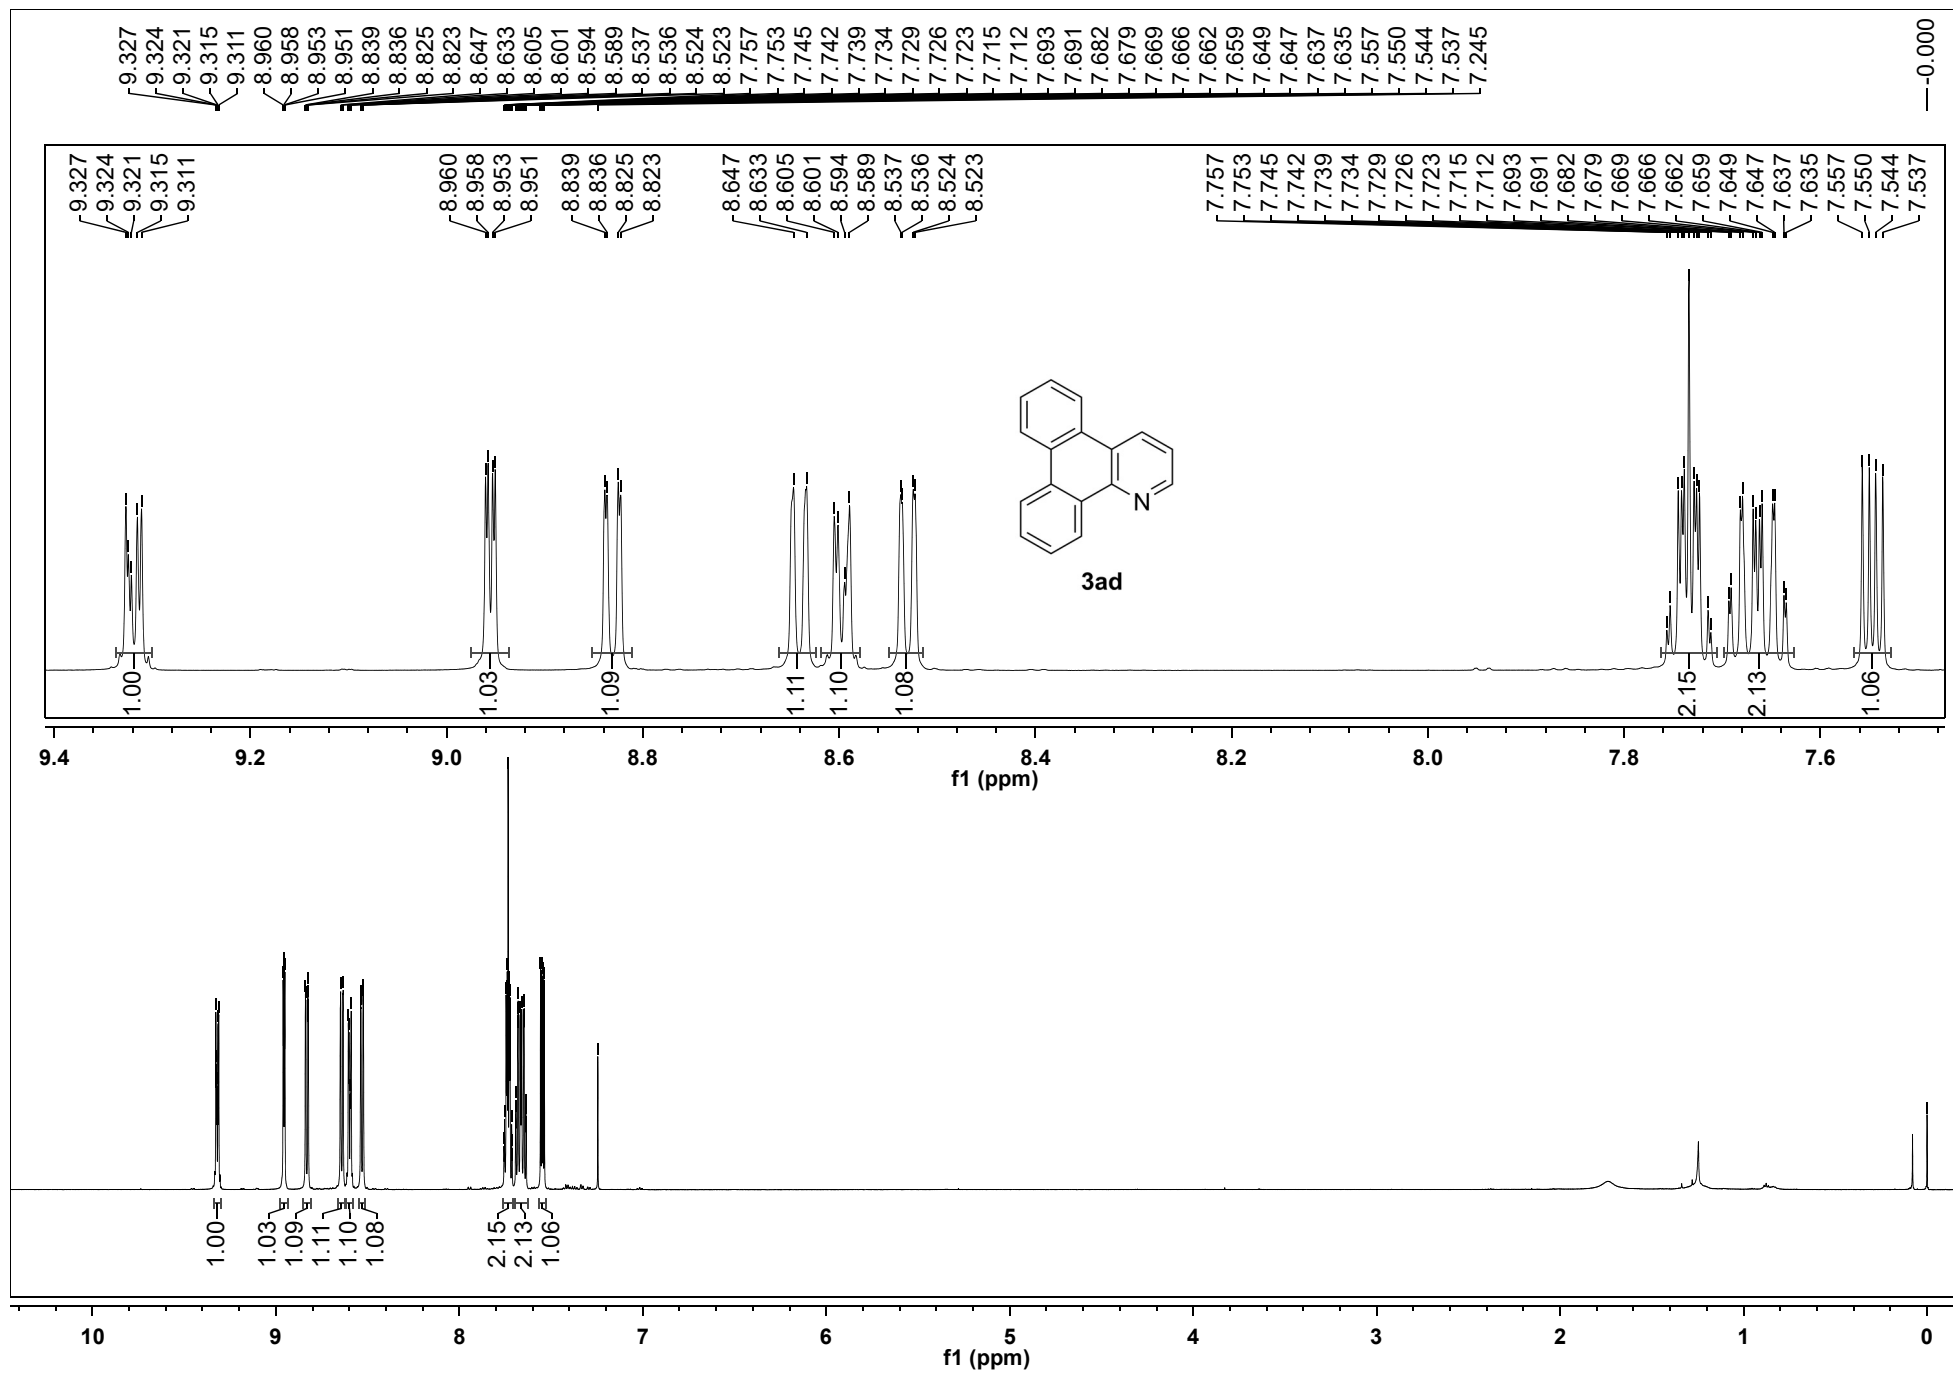

Figure S44.  $^{13}\text{C}\{^1\text{H}\}$  NMR spectrum (150 MHz,  $\text{CDCl}_3$ ) of 3ad

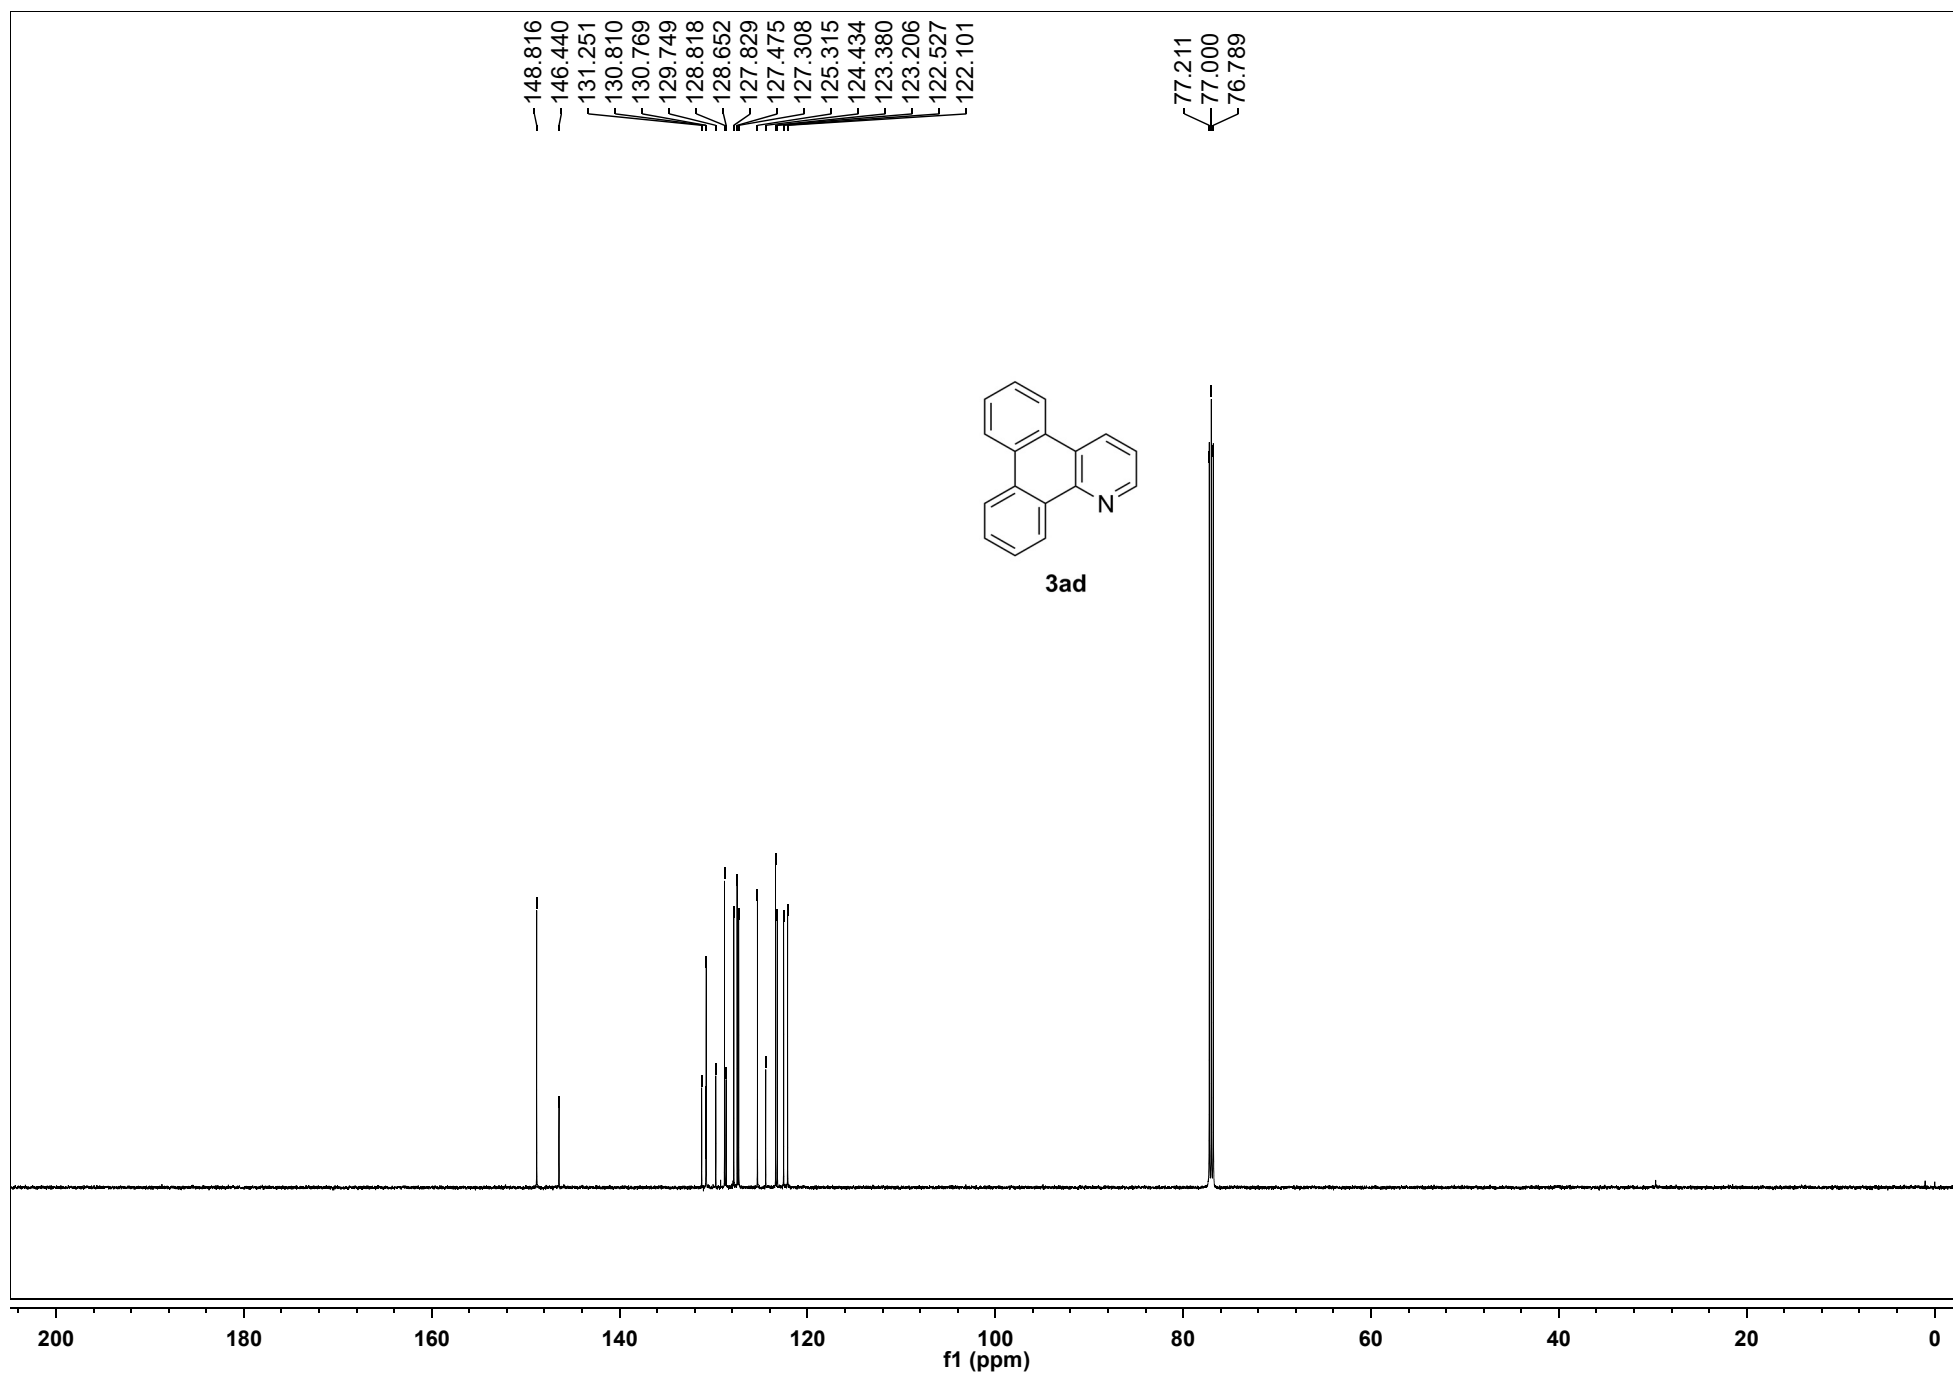

Supplement: d2ob01562e1.pdf [file d2ob01562e1.pdf]
